# Supplementary material
Source: PubMed Central journal article supplement (PMC4205641)
Supplement: pnas.1410932111.sapp.pdf [file pnas.1410932111.sapp.pdf]

## Supplementary Information

### **Seriniquinone, a selective anticancer agent, induces cell death by autophagocytosis, targeting the cancer protective protein dermcidin**

Lynnie Trzoss,<sup>1</sup> Takashi Fukuda,<sup>1</sup> Leticia V. Costa-Lotufo,<sup>1,2\*</sup> Paula Jimenez,<sup>2</sup> James J. La Clair,<sup>3\*</sup> and William Fenical<sup>1,4\*</sup>

<sup>1</sup> Center for Marine Biotechnology and Biomedicine, Scripps Institution of Oceanography, University of California at San Diego, La Jolla, CA 92093-0204

<sup>2</sup> Departamento de Fisiologia e Farmacologia, Universidade Federal do Ceará, Fortaleza, CE, Brazil, 60430-270

<sup>3</sup> Department of Chemistry and Biochemistry, University of California at San Diego, 9500 Gilman Drive, La Jolla CA 92093-0358

<sup>4</sup> Skaggs School of Pharmacy and Pharmaceutical Sciences, University of California at San Diego, La Jolla, CA 92093-0204

Correspondence and request for materials should be directed via email to:

William Fenical (wfenical@ucsd.edu), James J. La Clair (jlaclair@ucsd.edu) or Leticia V. Costa-Lotufo (costalotufo@gmail.com)

## Table of Contents

| <i>Contents</i>                                                                                                                                            | <i>Page</i> |
|------------------------------------------------------------------------------------------------------------------------------------------------------------|-------------|
| <b>A. General chemical methods</b>                                                                                                                         | <b>S3</b>   |
| A1. Selection and characterization of <i>Serinicoccus sp.</i>                                                                                              | S3          |
| A2. Isolation of seriniquinone ( <b>1</b> ) (Fig. 1a-1b, Table S1)                                                                                         | S3-S4       |
| A3. Chemical synthesis (Fig. 1c-1d)                                                                                                                        | S4-S11      |
| <b>B. General biological protocols</b>                                                                                                                     | <b>S11</b>  |
| B1. Tissue culture                                                                                                                                         | S11         |
| B2. Cell lysate preparation                                                                                                                                | S11-S12     |
| B3. SDS PAGE analysis                                                                                                                                      | S12         |
| B4. Western blot analysis                                                                                                                                  | S12         |
| B5. Confocal microscopy                                                                                                                                    | S13         |
| B6. Immunoprecipitation with the anti-IAF XRI-TF35 mAb                                                                                                     | S13         |
| <b>C. Experimental procedures</b>                                                                                                                          | <b>S13</b>  |
| C1. Subcellular localization studies (Fig. 2).                                                                                                             | S13         |
| C2. Time course imaging studies (Fig. 2c).                                                                                                                 | S13         |
| C3. Colocalization studies (Fig. 2d-2j).                                                                                                                   | S13         |
| C4. Trypan blue assays (Fig. 3a).                                                                                                                          | S14         |
| C5. Cytotoxicity analyses (Table S2).                                                                                                                      | S14         |
| C6. Cytotoxicity time course studies (Fig. 3b).                                                                                                            | S14         |
| C7. Validation of entry into autophagy (Fig. 3c).                                                                                                          | S14         |
| C8. Cell cycle and DNA fragmentation analyses (Fig. 3d-3e).                                                                                                | S14         |
| C9. Western blot analysis of cell cycle progression (Fig. 3f).                                                                                             | S15         |
| C10. Western blot analysis of apoptotic markers (Fig. 3g).                                                                                                 | S15         |
| C11. Immunoprecipitation with probe <b>15</b> (Fig. 4a).                                                                                                   | S15         |
| C12. Target identification (Fig. 4a and Fig. S1).                                                                                                          | S15-S16     |
| C13. Metabolic conversion studies (Fig. S2).                                                                                                               | S16         |
| C14. Immunoprecipitation with probe <b>16</b> (Fig. 4b).                                                                                                   | S16         |
| C15. Live cell immunoprecipitation with probe <b>16</b> (Fig. 4b).                                                                                         | S16         |
| C16. Iodoacetamide treatment after immunoprecipitation (L10, Fig. 4c).                                                                                     | S17         |
| C17. Iodoacetamide treatment before immunoprecipitation (L11, Fig. 4c).                                                                                    | S17         |
| C18. Western blot validation with probe <b>15</b> (Fig. 4d).                                                                                               | S18         |
| C19. Western blot validation with probe <b>16</b> (Fig. 4e).                                                                                               | S18         |
| C20. qPCR analysis (Fig. 4f).                                                                                                                              | S18         |
| C21. Confocal image analysis of probe <b>15</b> (Fig. S3).                                                                                                 | S19         |
| C22. Cell selectivity and bioactivity data (Table S2).                                                                                                     | S19         |
| Copies of <sup>1</sup> H, <sup>13</sup> C, gCOSY, <sup>1</sup> H, <sup>13</sup> C HSQC, <sup>1</sup> H, <sup>13</sup> C HMBC and LC/MS spectra on <b>1</b> | S20-S22     |
| Copies of <sup>1</sup> H and <sup>13</sup> C NMR spectra from <b>2, 7, 8, 9, 10, 11, 12, 13, 15, 16, and 18</b>                                            | S23-S33     |
| Copies of selected NCI60 analyses                                                                                                                          | S34-S51     |
| Copies of expanded images from Figure 2                                                                                                                    | S52-S53     |

**A. Chemical General Methods.** Unless otherwise noted, all reagents and chemical compounds were purchased from Alfa Aesar, GFS Chemicals, Strem Chemicals, Sigma-Aldrich or TCI America and used without further purification. Samples of seriniquinone (**1**) were obtained naturally or prepared in two steps using published methods as outlined in Fig. 1c [Matsuoka, M., Iwamoto, A. & Kitao, T. Reaction of 2,3-dichloro-1,4-naphthoquinone with dithiooxamide. Synthesis of dibenzo[b,i]thianthrene-5,7,12,14-tetrone. *J. Heterocyclic Chem.* **28**, 1445-1447 (1991)]. Tetraacetate **2**, probe **15** and probe **16** were prepared via chemical synthesis (Fig. 1d) with a purity >98% by NMR and HPLC analyses and stored as 1 mg/mL stocks in DMSO. While **2** and **16** proved stable as solid materials or DMSO stock solutions, probe **15** proved to be unstable and was prepared fresh and stored in 1 mg/mL stocks in DMSO at -80°C for up to 1 month. NMR spectra were recorded on a Mercury Plus 400 (Varian), ECA500 (Jeol), DMX500 (Bruker) or VX500 equipped with XSens cold probe (Varian) spectrometer. FID files were processed using MestRenova version 8.1 (MestreLab Research) and were referenced residual solvent peaks [S. Budavari, M.J. O'Neil, A. Smith, P.E. Heckelman, The Merck Index, an Encyclopedia of Chemicals, Drugs, and Biologicals, Eleventh Edition, Merck Co., Inc. Rahway, NJ, 1989]. High-resolution mass spectral (HRMS) data were obtained at the mass spectral facilities at the Scripps Research Institute, La Jolla, CA or at the University of California, San Diego Molecular Mass Spectroscopy Facility led by Dr. Yongxuan Su. Electrospray (ESI) and atmospheric pressure chemical ionization (APCI) analysis was performed using a LCQ Deca mass spectrometer (ThermoFinnigan), and fast atom bombardment (FAB) analysis was carried out using a MAT 900 XL mass spectrometer (ThermoFinnigan). UV spectra were measured on a DU800 spectrophotometer (Beckman) with a 1 cm cell. IR spectra were obtained with a Nicolet IR100 FT-IR (ThermoFinnigan). Reversed-phase HPLC separation was performed using a semi-preparative C18 Luna column (250 × 10 mm) at a flow rate of 2.5 mL/min using a 600E pump (Waters) and Lambda-Max model 480 UV detector (Waters).

**A1. Selection and characterization of *Serinicoccus sp.*** Strain CNJ927 was isolated from a sediment sample collected at a depth of 50 m near Palau in 2004. By analysis of the 16S rDNA gene sequence, CNJ927 was identified as *Serinicoccus sp.* A picture of this strain was provided in Fig. 1b. Strain CNJ927 was cultured at 27°C with shaking at 215 rpm in the medium A1BFe+C (10 g of starch, 4 g of yeast extract, 2 g of peptone, 1 g of CaCO<sub>3</sub>, 40 mg of Fe<sub>2</sub>(SO<sub>4</sub>)<sub>3</sub> • 4 H<sub>2</sub>O, 100 mg of KBr per 1 L of seawater) in a 2.8 L Fernbach flask. After 7 d, the 36 L broth (36 flasks) was extracted using with EtOAc (36 L). The EtOAc layer was dried over Na<sub>2</sub>SO<sub>4</sub> and concentrated by rotary evaporation to yield 2.0 g of crude extract.

**A2. Isolation of seriniquinone (**1**).** The crude extract was dissolved in a small volume of CHCl<sub>3</sub>, applied on a silica gel column (50 g, 3.2 × 20 cm, 200-450 mesh), and eluted stepwise with 100:0, 50:1, 25:1, 10:1, 5:1, 1:1 and 0:100 (v/v) of CHCl<sub>3</sub>:MeOH (150 mL/fraction). Seriniquinone was observed in the first fraction eluted with CHCl<sub>3</sub>. This fraction was purified by HPLC; 250 × 10 mm ODS column (Phenomenex), eluting with 70% aq. CH<sub>3</sub>CN at a flow rate 2.5 mL/min with detection at 210 nm. Under this condition, seriniquinone (**1**) was eluted as peak with retention time of 28.0 min. This peak was collected and concentrated to afford 2.4 mg of seriniquinone (**1**), as orange crystals (inset of Fig. 1b).

**Seriniquinone (**1**).** IR (plate)  $\nu_{\max}$  1664, 1588, 1500, 1258 cm<sup>-1</sup>; UV (CHCl<sub>3</sub>)  $\lambda_{\max}$  ( $\epsilon$ ) 342 (6900), 289 (24,000), 250 (20,700); <sup>1</sup>H NMR and <sup>13</sup>C NMR data are summarized in Table S1; HR-ESI-TOFMS [M+H]<sup>+</sup>  $m/z$  345.0210 (C<sub>20</sub>H<sub>9</sub>O<sub>4</sub>S, calcd. 345.0222). The structure and key COSY and HMBC correlations from **1** are provided in Fig. 1a.

| #  | $\delta$ H, mult ( <i>J</i> in Hz) | $\delta$ C, type | COSY | HMBC      |
|----|------------------------------------|------------------|------|-----------|
| 1  |                                    | 177.3, C         |      |           |
| 2  |                                    | 152.6, C         |      |           |
| 3  |                                    | 141.0, C         |      |           |
| 4  |                                    | 178.6, C         |      |           |
| 4a |                                    | 131.9, C         |      |           |
| 5  | 8.25, d (6.6)                      | 127.0, CH        | 6    | C4,C7,C8a |
| 6  | 7.81, t (6.6)                      | 133.9, CH        | 5,7  | C4a,C8    |
| 7  | 7.87, t (6.6)                      | 135.3, CH        | 6,8  | C5,C8a    |
| 8  | 8.35, d (6.6)                      | 128.6, CH        | 7    | C1,C4a,C6 |
| 8a |                                    | 134.8, C         |      |           |

**Table S1.** NMR spectroscopic data for serinoquinone (**1**) in CDCl<sub>3</sub>. Assignments are based on COSY, HSQC and HMBC analyses. Carbons C1 and C4, C4a and C8a, C5 and C8 or C6 and C7 could not be distinguished. <sup>1</sup>H NMR and <sup>13</sup>C NMR data was collected at 500 MHz and 125 MHz, respectively.

**A3. Chemical synthesis.** Synthetic efforts were conducted as noted in Fig. 1c-1d of the manuscript. High purity anhydrous solvents were used at all steps. Dichloromethane (CH<sub>2</sub>Cl<sub>2</sub>), tetrahydrofuran (THF) and *N,N*-dimethylformamide (DMF) were obtained by passing through a solvent column composed of dry activated A1 alumina. DMF was stored on oven dried 4Å molecular sieves for 24 h prior to use. EtN<sup>*i*</sup>Pr<sub>2</sub> was distilled from ninhydrin, dried (Na<sub>2</sub>SO<sub>4</sub>), and then redistilled from sodium. Water was obtained after purification via a Milli-Q water purifier (Millipore). All reactions were performed under a positive pressure of dry Ar in oven-dried thick walled round bottom flasks (ChemGlass) or glass vial (VWR Scientific) stirred with a Teflon coated stirbar. Flash chromatography was carried out on 40–63 mesh Geduran Silica Gel 60 (EM Biosciences). Thin layer chromatography (TLC) was conducted on 250 μm Silica Gel 60 F254 glass plates (EMD Chemicals). Visualization was achieved with UV light and stained with ceric ammonium molybdate. Yields and characterization data correspond to isolated, homogeneous materials. Unless otherwise noted, all solvent mixtures are given in v:v ratios. Several reactions were conducted on materials directly prepared without chromatographic purification. In these cases, flash chromatography was used to provide analytical samples for spectroscopic analyses.

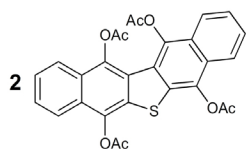

**Dinaphtho[2,3-*b*:2',3'-*d*]thiophene-5,7,12,13-tetraol tetraacetate (**2**).** A mixture of serinoquinone (**1**) (50.0 mg, 0.15 mmol), Zn dust (81.0 mg, 1.23 mmol) and Ac<sub>2</sub>O (2 mL) was brought to reflux. After 2 h, the reaction mixture was cooled to rt and the unreacted Zn dust was filtered off and the filtrate was concentrated by rotary evaporation. The crude product was



purified by flash chromatography (1:1 hexanes:CH<sub>2</sub>Cl<sub>2</sub> to CH<sub>2</sub>Cl<sub>2</sub>) to provide peracetoxyhydroquinone **2** (51.2 mg, 67%).

**Peracetoxyhydroquinone 2:** <sup>1</sup>H NMR (CDCl<sub>3</sub>, 500 MHz) δ 8.12 (td, *J* = 1.0, 8.3 Hz, 2H), 7.80 (td, *J* = 0.9, 8.2 Hz, 2H), 7.64 (ddd, *J* = 1.2, 6.8, 8.3 Hz, 2H), 7.59 (ddd, *J* = 1.3, 6.8, 8.1 Hz, 2H), 2.61 (s, 6H), 2.59 (s, 6H); <sup>13</sup>C NMR (CDCl<sub>3</sub>, 125MHz) δ 168.8, 168.7, 140.2, 137.7, 128.7, 127.2, 126.6, 126.2, 125.6, 122.9, 120.6, 20.8, 20.5; HR-ESI-MS *m/z* calcd. for C<sub>28</sub>H<sub>20</sub>O<sub>8</sub>SNa [M+Na]<sup>+</sup>:539.0879, found 539.0775.

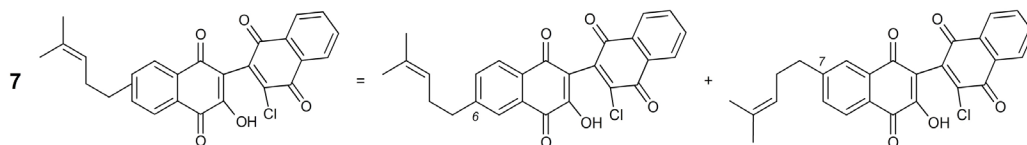

**3'-chloro-3-hydroxy-6(7)-(4-methylpent-3-en-1-yl)-[2,2'-binaphthalene]-1,1',4,4'-tetraone**

**(7).** Hydroxynaphthylquinone **6** (2.59 g, 10.11 mmol) prepared according to the methods of [José M. M. del Corral, M. A. Castroa, M. Gordaliza, M. L. Martin, A. B. Oliveira, S. A. Gualberto, M. D. García-Grávalos, A. San Feliciano, Synthesis and biological evaluation of cytotoxic 6(7)-alkyl-2-hydroxy-1,4-naphthoquinones. *Arch. Pharm. Pharm. Med. Chem.* **2002**, *9*, 427–437] and 2,3-dichloro-1,4-naphthoquinone (**3**) (2.30 g, 10.12 mmol) were dissolved in anhydrous CH<sub>3</sub>CN (200 mL). The flask was charged with an Ar atmosphere by repeated degassing. Anhydrous CsCO<sub>3</sub> (6.60 g, 20.21 mmol) was added and the contents were recharged with an Ar atmosphere by repeated degassing. The flask was wrapped in foil, to exclude light, and the slurry was stirred at rt. After 72 h, 2 N HCl was added until the pH was 2. The mixture was diluted with H<sub>2</sub>O (200 mL) and extracted with EtOAc (3 × 100 mL). The combined organic layers were washed with H<sub>2</sub>O (100 mL) then brine (100 mL), dried over Na<sub>2</sub>SO<sub>4</sub>, and concentrated by rotary evaporation. The crude product (4.55 g) was dried by azeotropic removal of toluene (3 × 100 mL), and used directly in the next step.

**Adduct 7:** <sup>1</sup>H NMR (CDCl<sub>3</sub>, 400 MHz) δ 8.24 (m, 1H), 8.15 (m, 1H), 8.08 (d, *J* = 7.9 Hz, 1H), 8.00 (d, *J* = 1.8 Hz, 1H), 7.80 (m, 2H), 7.66 (bs, 1H), 7.63 (dd, *J* = 1.8, 7.9 Hz, 1H), 5.13 (dddd, *J* = 1.4, 2.8, 5.8, 7.1 Hz, 1H), 2.80 (t, *J* = 7.6 Hz, 2H), 2.37 (q, *J* = 7.1 Hz, 2H), 1.69 (d, *J* = 1.3 Hz, 3H), 1.56 (d, *J* = 1.4 Hz, 3H); <sup>13</sup>C NMR (CDCl<sub>3</sub>, 125 MHz) δ 181.6, 181.1, 180.5, 177.5, 153.2, 149.2, 146.1, 139.0, 136.0, 134.6, 134.3, 133.5, 132.0, 131.5, 130.8, 129.3, 127.6, 127.6, 127.5, 126.8, 122.5, 115.3, 36.2, 29.4, 25.8, 17.9; HR-ESI-MS *m/z* calcd. for C<sub>26</sub>H<sub>20</sub>ClO<sub>5</sub> [M+H]<sup>+</sup>: 447.0994, found 447.0996.

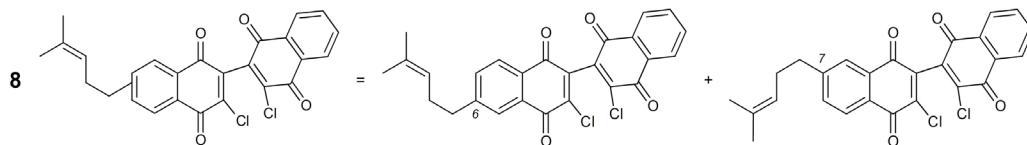

**3,3'-Dichloro-6(7)-(4-methylpent-3-en-1-yl)-[2,2'-binaphthalene]-1,1',4,4'-tetraone** **(8).**

Dried adduct **7** (4.55 g, 10.18 mmol) was dissolved in dry CH<sub>2</sub>Cl<sub>2</sub> (200 mL). After cooling to 0°C, oxalyl chloride (1.78 mL, 20.36 mmol) was added slowly followed by the addition of anhydrous DMF (catalytic, 20 drops). The mixture was warmed to rt. After stirring at rt for an additional 2 h, the mixture was poured onto ice H<sub>2</sub>O (100 mL) and stirred for 20 min at rt. The organic layer was then separated and the aqueous layer was extracted with CH<sub>2</sub>Cl<sub>2</sub> (3 × 60 mL). The combined organic layers were washed with brine (100 mL), dried over Na<sub>2</sub>SO<sub>4</sub>, and concentrated on a rotary evaporator. The crude product was purified by flash chromatography

(hexanes to 1:1 hexanes:EtOAc) to afford dichloride **8**, as yellow-orange solid (2.30 g, 49% in 3 steps from **5**).

**Dichloride 8:**  $^1\text{H}$  NMR ( $\text{CDCl}_3$ , 500 MHz)  $\delta$  8.27 (m, 1H), 8.16 (m, 1H), 8.06 (d,  $J = 8.3$  Hz, 1H, major isomer), 8.06 (d,  $J = 10.7$  Hz, 1H, minor isomer), 7.96 (qd,  $J = 0.6, 1.8$  Hz, 1H), 7.85 (m, 2H), 7.63 (m, 1H), 5.14 (ttdd,  $J = 1.5, 3.0, 5.6, 7.2$  Hz, 1H), 2.83 (t,  $J = 7.5$  Hz, 2H, major isomer), 2.81 (t,  $J = 7.3$  Hz, 2H, minor isomer), 2.39 (m, 2H), 1.70 (d,  $J = 1.3$  Hz, 3H, major isomer), 1.69 (d,  $J = 1.3$  Hz, 3H, minor isomer), 1.57 (dd,  $J = 0.6, 1.4$  Hz, 3H, major isomer), 1.56 (dd,  $J = 0.6, 1.4$  Hz, 3H, minor isomer);  $^{13}\text{C}$  NMR ( $\text{CDCl}_3$ , 125 MHz)  $\delta$  180.2, 179.9, 179.9, 179.7, 177.3, 177.1, 177.1, 176.9, 150.8, 150.5, 145.3, 145.2, 145.1, 145.0, 140.1, 140.0, 139.9, 139.7, 135.1, 134.9, 134.9, 134.9, 134.7, 133.6, 133.6, 131.6, 131.6, 131.4, 131.4, 131.3, 129.6, 129.4, 128.0, 127.8, 127.7, 127.7, 127.6, 127.4, 122.5, 122.5, 36.4, 36.4, 36.4, 29.4, 29.4, 25.8, 17.9; HR-ESI-MS  $m/z$  calcd. for  $\text{C}_{26}\text{H}_{18}\text{Cl}_2\text{O}_4\text{Na}$  [ $\text{M}+\text{Na}$ ] $^+$ : 487.0474, found 487.0477.

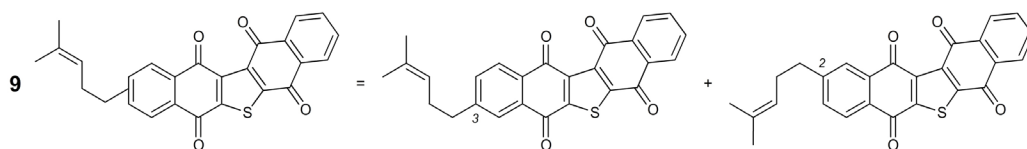

**2(3)-(4-Methylpent-3-en-1-yl)dinaphtho[2,3-*b*:2',3'-*d*]thiophene-5,7,12,13-tetraone (9).**

Dichloride **8** (3.47 g, 7.46 mmol) was dissolved in THF (75 mL).  $\text{Na}_2\text{S}$  (1.16 g, 14.91 mmol) dissolved in  $\text{H}_2\text{O}$  (75 mL) was added slowly at rt. After stirring at rt for an additional 1 h, the reaction was terminated by the addition of 1 N HCl (100 mL). The organic layer was collected and aqueous layer was further extracted with EtOAc ( $3 \times 50$  mL). The combined organic layers were washed with  $\text{H}_2\text{O}$  ( $2 \times 50$  mL) brine ( $2 \times 50$  mL), dried over  $\text{Na}_2\text{SO}_4$  and concentrated by rotary evaporation. The residue was passed through a short pad of silica gel (10 g) eluting with EtOAc (2 L). The resulting solution was concentrated on a rotary evaporator to obtain alkene **9**. This compound was rather instable and was best processed immediately after preparation. For characterization purposes, a small sample of **9** was purified by flash chromatography (hexanes to 1:1 hexanes:EtOAc).

**Alkene 9:**  $^1\text{H}$  NMR ( $\text{CDCl}_3$ , 500 MHz)  $\delta$  8.33 (dd,  $J = 7.6, 1.4$  Hz, 1H), 8.23 (dd,  $J = 1.4, 7.6$  Hz, 1H), 8.22 (d,  $J = 7.9$  Hz, 1H, major isomer), 8.13 (m, 1H, minor isomer), 8.03 (d,  $J = 1.8$  Hz, 1H, major isomer), 7.91 (d,  $J = 1.7$  Hz, 1H, minor isomer), 7.85 (dt,  $J = 1.5, 7.6$  Hz, 1H, major isomer), 7.79 (dt,  $J = 1.4, 7.5$  Hz, 1H, major isomer), 7.75 (m, 1H, minor isomer), 7.69 (m, 1H, minor isomer), 7.64 (dd,  $J = 1.8, 8.0$  Hz, 1H, major isomer), 7.59 (dd,  $J = 1.7, 8.0$  Hz, 1H, minor isomer), 5.14 (dddd,  $J = 1.5, 3.0, 5.7, 7.2$  Hz, 1H, major isomer), 5.09 (m, 1H, minor isomer), 2.81 (t,  $J = 7.8$  Hz, 2H, major isomer), 2.75 (t,  $J = 7.5$  Hz, 2H, minor isomer), 2.38 (m, 2H), 1.68 (d,  $J = 1.5$  Hz, 3H, major isomer), 1.57 (s, 3H, minor isomer), 1.54 (d,  $J = 1.5$  Hz, 3H, major isomer);  $^{13}\text{C}$  NMR ( $\text{CDCl}_3$ , 125 MHz)  $\delta$  178.9, 178.6, 177.4, 177.3, 152.6, 152.4, 149.6, 140.9, 140.8, 135.5, 135.2, 135.2, 134.9, 134.9, 134.2, 133.9, 133.5, 132.8, 132.0, 132.0, 131.9, 131.0, 129.9, 128.7, 128.6, 128.6, 128.5, 127.3, 127.2, 127.0, 126.9, 126.8, 122.6, 36.6, 36.3, 29.4, 29.4, 25.8, 17.9; HR-ESI-MS  $m/z$  calcd. for  $\text{C}_{26}\text{H}_{18}\text{O}_4\text{SNa}$  [ $\text{M}+\text{Na}$ ] $^+$ : 449.0818, found 449.0824.

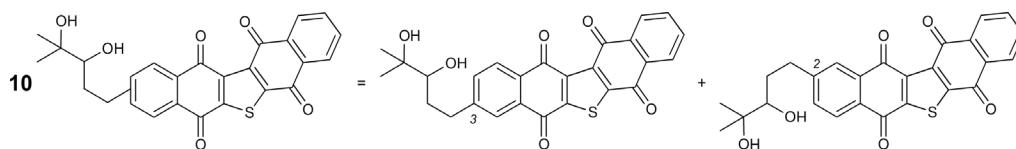

### 2(3)-(3,4-Dihydroxy-4-methylpentyl)dinaphtho[2,3-*b*:2',3'-*d*]thiophene-5,7,12,13-tetraone

**(10).** Alkene **9** (2.20 g, 5.16 mmol) was dissolved in a mixture of acetone (75 mL) and H<sub>2</sub>O (25 mL). *N*-Methylmorpholine-*N*-oxide (1.81 g, 15.50 mmol) and K<sub>2</sub>OsO<sub>4</sub> • 2 H<sub>2</sub>O (95.0 mg, 0.26 mmol) were added sequentially as solids. After stirring for 16 h at rt, H<sub>2</sub>O (100 mL) was added and acetone was removed by rotary evaporation. The mixture was extracted with EtOAc (3 × 60 mL). The organic layers were combined, washed with brine (50 mL), dried over Na<sub>2</sub>SO<sub>4</sub>, and concentrated by rotary evaporation. The crude product was purified by flash chromatography (1000:1 CH<sub>2</sub>Cl<sub>2</sub>:MeOH to 30:1 CH<sub>2</sub>Cl<sub>2</sub>:MeOH) to provide diol **10** (1.59 g, 67% over 2 steps from dichloride **8**).

**Diol 10:** <sup>1</sup>H NMR (CDCl<sub>3</sub>, 500 MHz) δ 8.31 (ddd, *J* = 0.6, 1.4, 7.7 Hz, 1H), 8.22 (m, 2H), 8.12 (d, *J* = 11.7 Hz, 1H, major isomer), 8.11 (d, *J* = 5.6 Hz, 1H, minor isomer), 8.04 (dd, *J* = 0.5, 2.0 Hz, 1H, minor isomer), 7.85 (dt, *J* = 1.4, 7.5 Hz, 1H), 7.79 (ddt, *J* = 0.8, 1.4, 7.4 Hz, 1H), 7.67 (dd, *J* = 1.9, 8.0 Hz, 1H), 7.63 (dd, *J* = 1.8, 7.9 Hz, 1H, minor isomer), 3.63 (m, 1H), 3.12 (m, 2H), 3.09 (m, 2H), 1.36 (s, 3H), 1.36 (s, 3H); <sup>13</sup>C NMR (CDCl<sub>3</sub>, 125 MHz) δ 178.6, 178.5, 178.5, 178.2, 177.4, 177.3, 177.3, 177.0, 152.7, 152.5, 152.4, 149.3, 147.8, 140.8, 140.7, 140.7, 140.6, 135.4, 135.2, 135.2, 135.0, 134.8, 134.8, 134.3, 133.9, 133.9, 133.1, 132.1, 132.0, 131.9, 130.6, 129.0, 128.5, 128.5, 128.0, 127.4, 127.0, 127.0, 126.5, 36.6, 36.4, 29.9, 29.7, 26.7, 26.7; HR-ESI-MS *m/z* calcd. for C<sub>26</sub>H<sub>21</sub>O<sub>6</sub>S [M+H]<sup>+</sup>: 461.1014, found 461.1060.

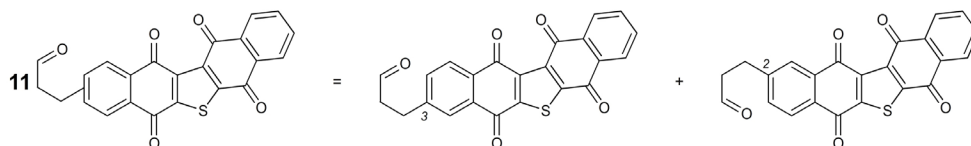

### 3-(5,7,12,13-Tetraoxo-5,7,12,13-tetrahydrodinaphtho[2,3-*b*:2',3'-*d*]thiophen-2(3)-yl)-

**propanal (11).** Silica gel supported NaIO<sub>4</sub> was prepared by dissolving NaIO<sub>4</sub> (1.16 g, 5.42 mmol) in H<sub>2</sub>O (4 mL) heated to 70°C. Silica gel (230-400 mesh, 8.0 g) was added to this hot solution with vigorous swirling and shaking. The resulting powder was added to a solution of diol **10** (1.25 g, 2.71 mmol) in CH<sub>2</sub>Cl<sub>2</sub> (65 mL). After stirring at rt for 2 h, the reaction mixture was filtered through Celite washing thoroughly with CH<sub>2</sub>Cl<sub>2</sub> (3 × 50 mL). The solvent was then removed by rotary evaporation to yield aldehyde **11** (1.06 g, 98%) as a yellow solid. Aldehyde **11** was used directly without further purification.

**Aldehyde 11:** <sup>1</sup>H NMR (CDCl<sub>3</sub>, 500 MHz) δ 9.87 (t, *J* = 0.9 Hz, 1H, minor isomer), 9.86 (t, *J* = 0.9 Hz, 1H, major isomer), 8.32 (dd, *J* = 1.2, 7.9 Hz, 1H), 8.24 (m, 2H), 8.15 (t, *J* = 7.9 Hz, 1H, minor isomer), 8.12 (d, *J* = 1.8 Hz, 1H, minor isomer), 8.04 (d, *J* = 1.8 Hz, 1H, major isomer), 7.85 (dt, *J* = 1.4, 7.5 Hz, 1H), 7.80 (tt, *J* = 1.0, 7.5 Hz, 1H), 7.69 (dd, *J* = 1.9, 8.0 Hz, 1H, major isomer), 7.64 (dd, *J* = 1.8, 7.9 Hz, 1H, minor isomer), 3.14 (m, 2H), 2.93 (m, 2H); <sup>13</sup>C NMR (CDCl<sub>3</sub>, 125 MHz) δ 200.2, 200.1, 178.6, 178.6, 178.5, 178.2, 177.4, 177.3, 177.3, 177.1, 152.7, 152.5, 152.4, 152.4, 148.9, 147.5, 140.8, 140.7, 140.7, 140.7, 135.4, 135.2, 135.2, 135.1, 134.8, 134.8, 134.2, 133.9, 133.2, 132.1, 132.0, 131.9, 130.3, 129.0, 128.6, 128.5, 128.1, 127.5, 127.0,

127.0, 126.5, 44.5, 44.4, 28.3, 28.1; HR-ESI-MS  $m/z$  calcd. for  $C_{23}H_{12}O_5SNa$   $[M+Na]^+$ : 423.0298, found 423.0305.

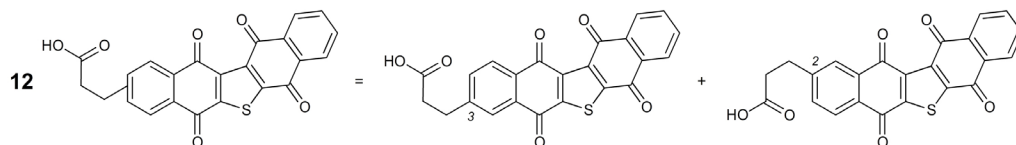

**3-(5,7,12,13-Tetraoxo-5,7,12,13-tetrahydrodinaphtho[2,3-*b*:2',3'-*d*]-thiophen-2(3)-yl)propanoic acid (12).** Oxone<sup>®</sup> (1.86 g, 3.03 mmol) was added to aldehyde **11** (1.21 g, 3.03 mmol) dissolved in DMF (20 mL). The mixture for was stirred for 2 h at rt. EtOAc (100 mL) and 1 N HCl (30 mL) were added to the reaction mixture. The organic layer was separated and washed with H<sub>2</sub>O (2 × 50 mL) and then brine (50 mL), dried over Na<sub>2</sub>SO<sub>4</sub>, and concentrated on a rotary evaporator to afford acid **12** (1.23 g, 98%). This material was used without further purification. Analytical samples were purified by flash chromatography (1:1 hexanes:CH<sub>2</sub>Cl<sub>2</sub> to 5:1 CH<sub>2</sub>Cl<sub>2</sub>:MeOH).

**Acid 12:** <sup>1</sup>H NMR (DMSO-*d*<sub>6</sub>, 500 MHz) δ 12.19 (bs, 1H), 8.19 (dd,  $J = 1.3, 7.7$  Hz, 1H, minor isomer), 8.18 (dd,  $J = 1.4, 7.8$  Hz, 1H, major isomer), 8.14 (dd,  $J = 1.4, 7.6$  Hz, 1H), 8.10 (d,  $J = 8.0$  Hz, 1H, major isomer), 8.06 (d,  $J = 7.9$  Hz, 1H, minor isomer), 8.04 (d,  $J = 1.8$  Hz, 1H, minor isomer), 8.00 (d,  $J = 1.8$  Hz, 1H, major isomer), 7.97 (dt,  $J = 1.4, 7.5$  Hz, 1H), 7.92 (dt,  $J = 1.4, 7.5$  Hz, 1H), 7.84 (dd,  $J = 1.9, 7.9$  Hz, 1H, major isomer), 7.78 (dd,  $J = 1.8, 7.9$  Hz, 1H, minor isomer), 3.03 (t,  $J = 7.4$  Hz, 2H), 2.66 (t,  $J = 7.4$  Hz, 2H); <sup>13</sup>C NMR (DMSO-*d*<sub>6</sub>, 125 MHz) δ 178.3, 178.2, 176.7, 176.5, 173.4, 151.7, 151.7, 147.9, 140.2, 140.1, 135.2, 134.4, 134.0, 132.6, 131.6, 131.6, 127.8, 127.5, 126.3, 126.0, 34.4, 30.2; HR-ESI-MS  $m/z$  calcd. for  $C_{23}H_{12}O_6SNa$   $[M+Na]^+$ : 439.0355, found 439.0217.

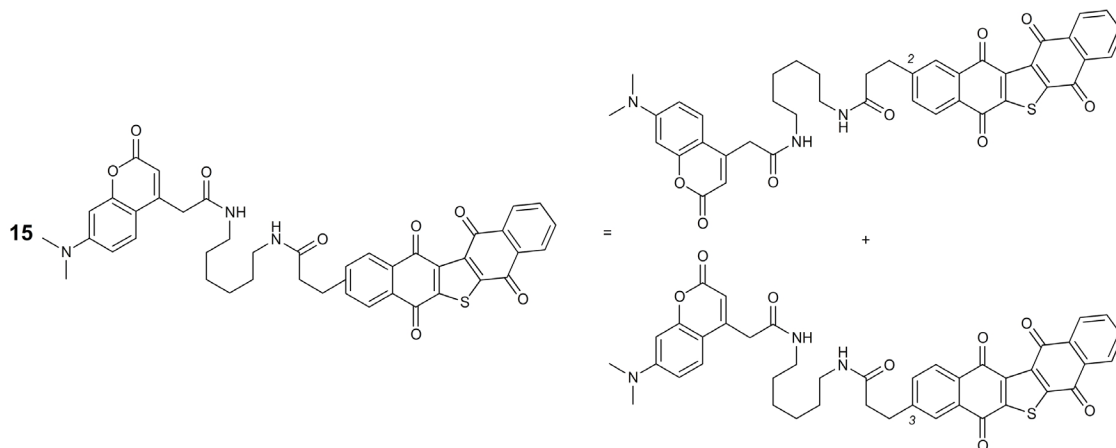

***N*-(6-(2-(7-(Dimethylamino)-2-oxo-2H-chromen-4-yl)acetamido)hexyl)-3-(5,7,12,13-tetraoxo-5,7,12,13-tetrahydrodinaphtho[2,3-*b*:2',3'-*d*]thiophen-2(3)-yl)propanamide (15).** Acid **12** (21.0 mg, 0.05 mmol) was dissolved in dry DMF (0.5 mL) and TSTU (21.1 mg, 0.07 mmol) was added. After 3 h, a solution of *N*-(6-aminohexyl)-2-(7-(dimethylamino)-2-oxo-2H-chromen-4-yl)acetamide (**14a**) (19.2 mg, 0.05 mmol) in DMF (0.5 mL) was added and the mixture was stirred at rt. After 6 h, MeOH (15 mL) was added. The preparation of IAF tag **14a** was described previously [Yu, W. L., et. Al. Spirohexenolide A targets human macrophage migration inhibitory factor (hMIF). *J. Nat. Prod.* **76**, 817-823 (2013) also see Yu, W. L., Guizzunti, G., Foley, T. L.,

Burkart, M. D. & La Clair, J. J. An optimized immunoaffinity fluorescent method for natural product target elucidation. *J. Nat. Prod.* **73**, 1659-1666 (2010)]. The mixture was filtered through a pad of Celite® (1-2 g). The supernatant was collected and dried by rotary evaporation and purified crystallization from 10:1 CH<sub>2</sub>Cl<sub>2</sub>:MeOH to afford 2.2 mg (8 %) of probe **15**. This material proved instable to flash or preparative HPLC and was not sufficiently stable to collect adequate <sup>13</sup>C NMR data. Samples of probe **15** were dissolved at 1 mg/mL in DMSO, aliquotted, and stored at -80°C until usage for up to 24 days. Copies of <sup>1</sup>H NMR and <sup>1</sup>H,<sup>1</sup>H gCOSY NMR spectra from probe **15** have been provided within the Supplemental Information. Due to stability issues, this material was not fully characterized. HR-ESI-MS *m/z* calcd. for C<sub>42</sub>H<sub>38</sub>N<sub>3</sub>O<sub>8</sub>S [M+H]<sup>+</sup>: 744.2380 found 744.2401.

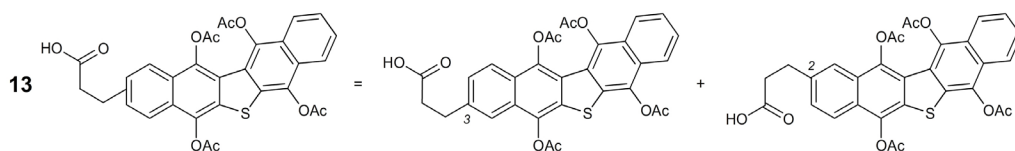

**3-(5,7,12,13-Tetraacetyldinaphtho[2,3-*b*:2',3'-*d*]thiophen-2/3-yl)propanoic acid (13).** A mixture of acid **12** (80.0 mg, 0.19 mmol), Zn dust (97.0 mg, 1.48 mmol) and Ac<sub>2</sub>O (2 mL) was brought to reflux for 2 h. Upon completion, the reaction mixture was cooled to rt. The unreacted Zn dust was filtered off, and the filtrate was concentrated by rotary evaporation. The crude product was purified by flash chromatography (1:1 hexanes:CH<sub>2</sub>Cl<sub>2</sub> to 100:1 CH<sub>2</sub>Cl<sub>2</sub>:MeOH) to provide acid **13** (70.6 mg, 65%).

**Acid 13:** <sup>1</sup>H NMR (CDCl<sub>3</sub>, 500 MHz) δ 8.12 (m, 1H), 8.05 (d, *J* = 8.7 Hz, 1H), 7.91 (m, 1H), 7.80 (d, *J* = 8.4 Hz, 1H, major isomer), 7.74 (d, *J* = 8.6 Hz, 1H, minor isomer), 7.63 (m, 1H), 7.60 (m, 1H), 7.49 (dd, *J* = 1.7, 8.7 Hz, 1H, minor isomer), 7.44 (dd, *J* = 1.7, 8.8 Hz, 1H), 3.17 (m, 2H), 2.78 (m, 2H), 2.60-2.57 (multiple singlets, 12H); <sup>13</sup>C NMR (CDCl<sub>3</sub>, 125 MHz) 170.8, 177.9, 168.5, 168.4, 168.4, 168.3, 168.2, 168.2, 152.7, 140.7, 140.7, 140.6, 140.4, 138.6, 138.2, 138.2, 137.9, 130.6, 130.3, 130.2, 129.7, 129.2, 128.1, 128.0, 127.6, 127.4, 127.2, 127.1, 127.0, 126.8, 126.8, 126.6, 126.5, 126.4, 126.4, 126.0, 125.9, 125.6, 123.2, 122.8, 122.7, 121.3, 121.0, 120.5, 120.5, 119.1, 35.2, 35.3, 31.0, 31.0, 21.1, 21.1, 21.1, 20.8; HR-ESI-MS *m/z* calcd. for C<sub>31</sub>H<sub>25</sub>O<sub>10</sub>S [M+H]<sup>+</sup>: 611.1021, found 611.1003.

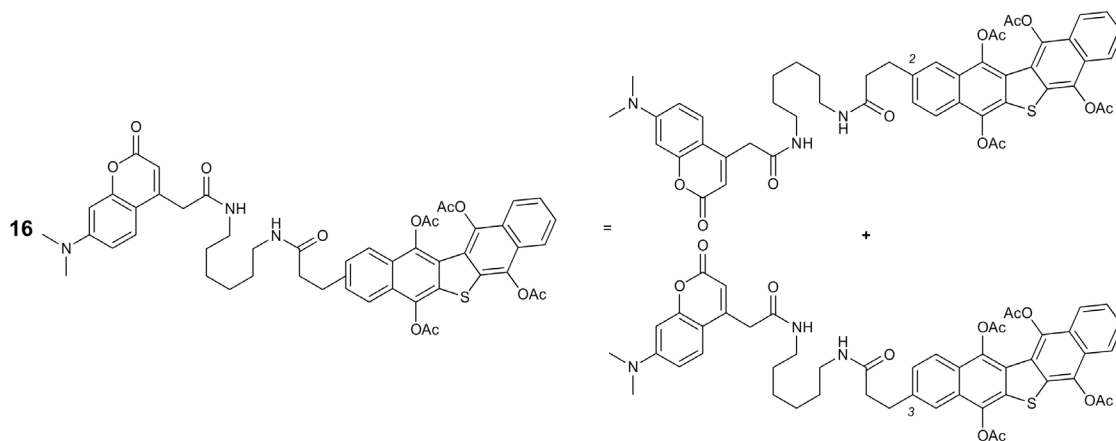

**2(3)-(3-((6-(2-(7-(Dimethylamino)-2-oxo-2H-chromen-4-yl)acetamido)hexyl)amino)-3-oxopropyl)dinaphtho[2,3-*b*:2',3'-*d*]thiophene-5,7,12,13-tetrayl tetraacetate (16).** Acid **13** (74.0 mg, 0.12 mmol) was dissolved in anhydrous DMF (12 mL). *N*-(6-aminohexyl)-2-(7-



(dimethylamino)-2-oxo-2*H*-chromen-4-yl)acetamide (**14a**) (65.0 mg, 0.15 mmol) was added followed by EtN<sup>*i*</sup>Pr<sub>2</sub> (0.064 mL, 0.37 mmol) and HATU (61.0 mg, 0.16 mmol) at 0°C. The preparation of IAF tag **14a** was described previously [Yu, W. L., et. Al. Spirohexenolide A targets human macrophage migration inhibitory factor (hMIF). *J. Nat. Prod.* **76**, 817-823 (2013) also see Yu, W. L., Guizzunti, G., Foley, T. L., Burkart, M. D. & La Clair, J. J. An optimized immunoaffinity fluorescent method for natural product target elucidation. *J. Nat. Prod.* **73**, 1659-1666 (2010)]. The reaction was then warmed to rt. After 3 h at rt, the DMF was removed by rotary evaporation. The crude product was purified by flash chromatography (100:1 CH<sub>2</sub>Cl<sub>2</sub>:MeOH to 20:1 CH<sub>2</sub>Cl<sub>2</sub>:MeOH) to provide probe **16** (32.0 mg, 29%).

**Probe 16:** <sup>1</sup>H NMR (CDCl<sub>3</sub>, 500 MHz) δ 8.10 (d, *J* = 9.1 Hz, 1H), 8.03 (d, *J* = 8.7 Hz, 1H), 7.78 (d, *J* = 10.1 Hz, 1H), 7.60 (m, 3H), 7.56 (d, *J* = 7.0 Hz, 1H), 7.33 (d, *J* = 8.9 Hz, 1H), 6.51 (dd, *J* = 9.0, 2.6 Hz, 1H), 6.44 (d, *J* = 2.4 Hz, 1H), 5.83 (m, 1H), 5.79 (s, 1H), 5.45 (m, 1H), 3.21 (s, 2H), 3.16 (m, 2H), 3.07 (m, 2H), 2.98 (m, 6H), 2.93 (m, 2H), 2.59 (m, 12H), 1.06 (m, 10H); <sup>13</sup>C NMR (DMSO-*d*<sub>6</sub>, 125MHz) δ 171.5, 169.4, 169.3, 169.2, 168.2, 161.4, 156.0, 153.5, 152.1, 143.3, 140.8, 140.6, 138.3, 137.9, 129.4, 129.3, 127.7, 127.5, 127.1, 126.9, 126.6, 126.3, 125.5, 125.4, 123.5, 121.2, 119.2, 110.0, 109.6, 108.8, 98.1, 49.2, 39.3, 39.0, 29.7, 29.5, 26.7, 26.6, 21.3, 21.2, 21.1; HR-ESI-MS *m/z* calcd. for C<sub>50</sub>H<sub>50</sub>N<sub>3</sub>O<sub>12</sub>S [M+H]<sup>+</sup>: 916.3070, found 916.3146.

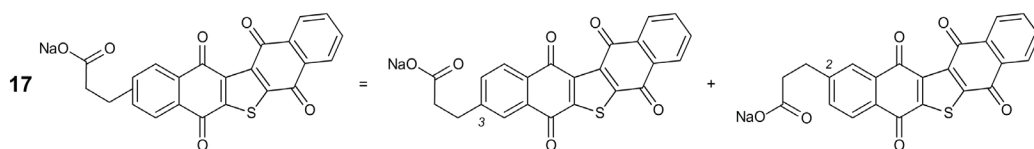

**2(3)-(3-((6-(2-(7-(Dimethylamino)-2-oxo-2*H*-chromen-4-yl)acetamido)hexyl)amino)-3-oxopropyl)dinaphtho[2,3-*b*:2',3'-*d*]thiophene-5,7,12,13-tetrayl tetraacetate (17).** A solution of NaOMe in MeOH (0.05 M, 0.72 mL, 0.036 mmol) was added to acid **13** (15.0 mg, 0.365 mmol) dissolved in MeOH (20 mL). The reaction mixture was stirred at rt for 2 h under Ar atmosphere until all solids dissolved. Upon completion, the solvent was reduced to a final volume of 2 mL by rotary evaporation. Ether (20 mL) was added to this solution with vigorous stirring. The orange precipitate was collected by filtration, washed excessively with ether (5 × 2 mL) then CH<sub>2</sub>Cl<sub>2</sub> (5 × 2 mL) and dried under high vacuum to afford sodium salt **17** (4.0 mg, 24%), as an orange solid. Spectral properties corresponded to those reported for acid **12**.

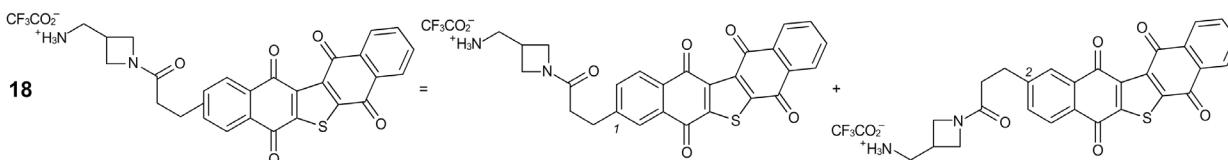

**(1(2)-(3-(5,7,12,13-tetraoxo-5,7,12,13-tetrahydrodinaphtho[2,3-*b*:2',3'-*d*]thiophen-3-yl)propanoyl)azetid-3-yl)methanaminium 2,2,2-trifluoroacetate (18).** Acid **13** (45.0 mg, 0.11 mmol), *tert*-butyl acetidine-3-ylmethylcarbamate (53.0 mg, 0.14 mmol) and EtN<sup>*i*</sup>Pr<sub>2</sub> (0.1 mL, 0.54 mmol) were dissolved in anhydrous DMF (2 mL) under an Ar atmosphere. The mixture was cooled to 0°C and HATU (48.0 mg, 0.22 mmol) was added at 0°C. The mixture was warmed to rt and stirred for an additional 2 h at rt. The reaction was terminated by the addition of 1 M sodium phosphate buffer pH 7 (10 mL) and extracted with EtOAc (3 × 15 mL). The combined organic layers were washed with H<sub>2</sub>O (15 mL) then brine (15 mL), dried with Na<sub>2</sub>SO<sub>4</sub> and concentrated by rotary evaporation. The mixture was purified by flash chromatography (1000:1

CH<sub>2</sub>Cl<sub>2</sub>:MeOH to 100:1 CH<sub>2</sub>Cl<sub>2</sub>:MeOH) affording the Boc-protected amide (45.2 mg, 71%). A sample of this material (20 mg) was dissolved in 3:1 CH<sub>2</sub>Cl<sub>2</sub>:TFA (0.9 mL) and stirred at rt. After 1 h, Et<sub>2</sub>O (10 mL) was added under vigorous stirring. The yellow precipitate was collected by filtration, washed excessively with ether (5 × 2 mL) and CH<sub>2</sub>Cl<sub>2</sub> ether (5 × 2 mL) and dried under high vacuum to afford amide **18** (7.0 mg, 42%), as a yellow solid.

**Amide 18:** <sup>1</sup>H NMR (CD<sub>3</sub>OD, 500 MHz) δ 8.22-8.08 (m, 3H), 8.01-7.91 (m, 2H), 7.82 (d, *J* = 8.1 Hz, 1H), 7.74 (bs, 2H), 4.15 (t, *J* = 8.5 Hz, 1H), 3.89 (t, *J* = 9.1 Hz, 1H), 3.82 (dd, *J* = 5.3, 8.8 Hz, 1H), 3.62 (dd, *J* = 5.3, 9.8 Hz, 1H), 3.01 (td, *J* = 7.3, 15.3 Hz, 4H), 2.80-2.69 (m, 1H), 2.45 (dd, *J* = 7.4, 13.8 Hz, 2H); <sup>13</sup>C NMR (DMSO-*d*<sub>6</sub>, 125MHz) δ 178.9, 178.8, 177.3, 177.1, 171.7, 153.4, 152.3, 149.0, 140.8, 140.7, 135.9, 135.9, 135.0, 134.7, 132.2, 132.2, 128.4, 128.2, 127.0, 126.7, 53.4, 51.4, 42.5, 32.0, 27.0; HR-ESI-MS *m/z* calcd. for C<sub>27</sub>H<sub>21</sub>N<sub>2</sub>O<sub>5</sub>S [M+H]<sup>+</sup>: 485.1126, found 485.1211.

**B. General biological protocols.** All reagents and media were used at molecular biological grades. The following sections provide experimental procedures for the biological studies described in Figs. 2-4, as denoted below.

**B1. Tissue culture.** The bulk of this program was conducted using the HCT-116 (ATCC# CCL-247). However, additional cell lines including Malme-3M (ATCC# HTB-64), PC-3M (DCTD tumor repository, NCI), SF-295 (DCTD tumor repository, NCI), SW-620 (DCTD tumor repository, NCI), Colo 205 (DCTD tumor repository, NCI), WIDR (DCTD tumor repository, NCI), OVCAR-8 (DCTD tumor repository, NCI) and HL-60 (DCTD tumor repository, NCI) were evaluated to validate the activity observed in the HCT-116 cell lines. Often, we conducted confocal or activity assays in multiple cell lines as a mean to carefully validate the observed effects. The following procedures were used throughout this program for growth of the respective cell lines. The cell lines listed above, with the exception of Malme-3M, were cultured in Roswell Park Memorial Institute (RPMI) medium (GIBCO-BRL), supplemented with 10% inactivated fetal calf serum (FCS) and 1% penicillin/streptomycin (GIBCO-BRL). Malme-3M cells were cultured in Iscove's modified Dulbecco's medium (GIBCO-BRL) supplemented with 20% inactivated FCS and 1% penicillin/streptomycin. All cells were manipulated under sterile conditions provided by a class II biohazard safety flow hood and incubated at 37°C in a 5% CO<sub>2</sub> atmosphere. Every 2 - 4 d, cells were detached from flask using a 0.05% trypsin-EDTA solution (GIBCO-BRL) and split 1:4 for routine passage.

**B2. Cell lysate preparation.** All samples of cell lysate were prepared fresh, stored on ice and used within 4 h of production. Cells were cultured in 75 cm<sup>2</sup> culture flask to a density of 5 × 10<sup>4</sup> cells/cm<sup>2</sup> to 1 × 10<sup>5</sup> cells/cm<sup>2</sup>. The cells were washed with phosphate buffered saline (PBS) (2 × 5 mL), harvested by gentle removal using a tissue scraper, and suspended in either PBS (5 mL) containing 25-50 μL of a protease inhibitor cocktail (104 mM 4-(2-aminoethyl)-benzenesulfonylfluoride hydrochloride, 80 μM aprotinin, 4 mM bestatin, 1.4 mM E-64, 2 mM, Leupeptin, 1.5 mM pepstatin A in DMSO) or radioimmunoprecipitation assay (RIPA) buffer (5 mL) (25 mM Tris-HCl pH 7.6, 150 mM NaCl, 1% NP-40, 1% sodium deoxycholate and 0.1 % sodium dodecylsulfate) containing 25-50 μL of a protease inhibitor cocktail. The resulting cell suspension was then passed through 27.5 gauge needle multiple times using syringe. The crude cell lysate centrifuged at 2,500 × g, concentrated to the desired concentration using a 3 kDa spin concentrator (Millipore), and stored at 4°C until used. When required, the concentration of

protein in the lysates was checked via Bradford analysis or Lowry's analysis using the DC Protein Assay kit (Pierce).

**B3. SDS PAGE analysis.** Samples were diluted in 1:1 ratio with 2 × Laemmli sample buffer (65.8 mM Tris-HCl, pH 6.8, 2.1% SDS, 26.3% w/v glycerol, 0.01% w/v bromophenol blue, 0.5% v/v β-mercaptoethanol) and run on a 4-12% Bis-Tris NuPAGE gel (Life Technologies) with NuPAGE MES SDS buffer (Life Technologies). Gels were stained using SilverQuest kit (Life Technologies) using the fast staining protocol as described by the manufacturer. Gels were imaged on a conventional flatbed scanner (1260, Epson)

**B4. Western blot analysis.** Protein extracts were quantified the Lowry assay using the DC Protein Assay kit (Bio-Rad Laboratories). Equal amounts of protein (typically 30 μg) were used for analytical studies. Each sample was diluted 1:1 ratio with 2 × Laemmli sample buffer (Bio-Rad), boiled for 5 min, cooled and then submitted to SDS-PAGE (see Section B3). The resulting gel was transferred to a polyvinylidene difluoride (PVDF) membrane (GE Healthcare or Bio-Rad Laboratories) using a Novex X-cell system (Life Technologies) using Novex Tris-glycine transfer buffer (Life Technologies) containing 20% MeOH. After transfer, the blot was blocked by shaking with 5% non-fat dry milk in TBS (137 mM NaCl, 20 mM Tris) (10 mL) for 1 h at rt. The blots were washed with (3 × 10 mL) TBST (137 mM NaCl, 20 mM Tris, 0.1% Tween-20) and lightly shaken with primary antibody in 5% bovine serum albumin in TBS (10 mL) for 12 h at 4°C. The following primary antibodies were used at the ascribed dilution: caspase-3 at 1:1000 dilution (9662, Cell Signaling Technology Inc.), cleaved caspase-3 at 1:1000 dilution (9664, Cell Signaling Technology Inc.), caspase 7 at 1:1000 dilution (9492, Cell Signaling Technology Inc.), cleaved caspase-7 at 1:1000 dilution (8438, Cell Signaling Technology Inc.), caspase-9 at 1:1000 dilution (9502, Cell Signaling Technology Inc.), cleaved caspase-9 at 1:1000 dilution (7237, Cell Signaling Technology Inc.), PARP at 1:1000 dilution (9542, Cell Signaling Technology Inc.), cleaved PARP at 1:1000 dilution (5625, Cell Signaling Technology Inc.), cyclin A2 at 1:1000 dilution (4656, Cell Signaling Technology Inc.), cyclin B1 at 1:1000 dilution (4138, Cell Signaling Technology Inc.), cyclin D1 at 1:1000 dilution (2978, Cell Signaling Technology Inc.), cyclin D2 at 1:1000 dilution (3741, Cell Signaling Technology Inc.), cyclin D3 at 1:1000 dilution (2936, Cell Signaling Technology Inc.), cyclin E1 at 1:1000 dilution (4129, Cell Signaling Technology Inc.), cyclin E2 at 1:1000 dilution (4132, Cell Signaling Technology Inc.), cyclin H at 1:1000 dilution (2927, Cell Signaling Technology Inc.), LC3A at 1:2000 dilution (4599, Cell Signaling Technology Inc.), LC3B at 1:2000 dilution (3868, Cell Signaling Technology Inc.), anti-IAF XRI-TF35 at 1:1000 to 1:2000 dilution (Xenobe Research Institute), DCD at 1:100 dilution (PIPA513677, ThermoScientific Pierce), or GAPDH at 1:2000 dilution (ABP-MAB-GL001, Allele Biotechnologies). As required, β-Actin at 1:10,000 dilution (ab8227, Abcam) was used to normalize protein loading. After treatment with the primary antibodies, the blots were washed with (3 × 10 mL) TBST (137 mM NaCl, 20 mM Tris, 0.1% Tween-20) and lightly shaken secondary antibody in 2.5% bovine serum albumin in TBS (10 mL) for 2 h at rt. The following secondary alkaline phosphatase conjugated antibodies were used: anti-mouse at 1:500 to 1:2000 dilution, (7056, Cell Signaling Technology Inc.) and anti-rabbit at 1:500 to 1:2000 dilution (7054, Cell Signaling Technology Inc. or 69266, Novagen). Blots were developed by treatment with BCIP/NBT color development substrate (34042, Pierce or S3771, Promega) according to the manufacturer's protocols. Blots were imaged on a conventional flatbed scanner (1260, Epson).



**B5. Confocal microscopy.** Confocal studies were conducted on a LSM 710 inverted confocal microscope (Zeiss) containing a scanning module with three detection channels, a Plan-Apochromat 63 × 1.4 na objective, and multiple lasers including a diode lasers at CW pulsed (405 nm, 30 mW), an Ar-laser (458 nm, 488 nm, 514 nm, each at 25 mW), and a HeNe-laser (543 nm, 1 mW) and HeNe-laser (633 nm, 5 mW).

**B6. Immunoprecipitation with the anti-IAF XRI-TF35 mAb.** Cell lysate (1 mL) containing an ascribed concentration of **15** or **16** was added to 100 µL of Affi-Gel 10 resin (Bio-Rad) bearing 1.5 mg/mL of covalently attached anti-IAF XRI-TF35 mAb (Xenobe Research Institute). The resulting slurry were shaken on a Labquake rotator (Thermo Scientific) for 12 h at 4°C. The resin was then collected and washed with ice-cold RIPA buffer (3 × 1 mL). After the wash was complete, all of the remaining aqueous solution was removed by aspiration. The resin was treated 1 mM 7-dimethylaminocoumarin-4-acetic acid in RIPA buffer (50 µL) and centrifuged for 5 min at 2,500 × g. The supernatant was collected as the immunoprecipitated fraction. Samples of the immunoprecipitated fraction were diluted in 1:1 ratio with 2 × Laemmli sample buffer (Bio-Rad Laboratories) and evaluated by SDS-PAGE (see Section B3) or Western blot analysis (see Section B4).

**C. Experimental procedures.** The following sections provide detailed experimental procedures for the data presented within Figs. 2-4 of the manuscript.

**C1. Subcellular localization studies.** Five different cell lines (HCT-116, PC-3M, SF-295, HCT-8 or Malme-3M) were evaluated to confirm the uptake and subcellular localization. A common procedure was used for all imaging studies. Cells were seeded 24 h prior to treatment in 35 mm glass-bottom dishes (MatTek Corporation) and cultured until a density of  $5 \times 10^3$  cells/cm<sup>2</sup> to  $1 \times 10^4$  cells/cm<sup>2</sup>. All compounds were added to cells under 1 mL of media from DMSO stocks such that the DMSO content remained under 0.1%. Cells were cultured for the ascribed periods at 37°C in a 5% CO<sub>2</sub> atmosphere and imaged as described in Section B5. Images from these studies were presented in Fig. 2.

**C2. Time-course imaging studies.** Compound **1** was added at time 0 h and cells were cultured for an ascribed period at 37°C in a 5% CO<sub>2</sub> atmosphere. After incubation, the cells were fixed by treatment with 4% formaldehyde in PBS followed by washing twice with PBS (2 × 1 mL). Images were collected 2 h to 6 h after fixation as described in Section B5. Images from these studies were presented in Fig. 2c.

**C3. Colocalization studies.** Counterstaining was used to verify the subcellular localization in the endoplasmic reticulum (ER) and autophagosomes. For the ER co-staining, cells were treated with **1** for the ascribed period, and then stained live with 0.5 µM ER-tracker™ Blue-White DPX (Life Technologies) at 37°C. After 30 min, cells were washed PBS (4 × 1 mL) and analyzed immediately by confocal microscopy. The fluorescence from **1** was acquired by red emission at 550-631 nm, while the ER-tracker was acquired by blue emission at 406-450 nm. For autophagosomal co-staining, cells were treated with **1** for the ascribed period, and then stained with 50 µM dansylcadaverine at 37°C. After 15 min, cells were washed PBS (4 × 1 mL) and analyzed immediately by confocal microscopy. Live cells were used for confocal analysis. The fluorescence from **1** was acquired by red emission at 550-631 nm, while the ER-tracker was acquired by blue emission at 415-530 nm (see Section B5.) Images from these studies were presented in Fig. 2d-2j.

**C4. Trypan blue assays.** Cell viability was determined using the Trypan blue dye exclusion test after incubation of HCT-116 cells. Cells were cultured to  $5 \times 10^4$  cells/cm<sup>2</sup> in the presence of either 0.3  $\mu$ M **1**, 3  $\mu$ M **1**, or 30  $\mu$ M **1**. Aliquots were removed from cultures after 24 h or 48 h. The cells that excluded Trypan blue (viable) or did not exclude Trypan blue (non-viable) were differentially counted using a Neubauer chamber (New Optik). Data from these studies was presented in Fig. 3a.

**C5. Cytotoxicity analyses.** Cytotoxicity analyses were conducted in multiple cell lines (HCT-116, Malme-3M, SW-620, Colo 205, WIDR, OVCAR-8, SF-295 or HL-60). Briefly, cells were cultured (see Section B1) in 96-well plates to a density of  $1 \times 10^4$  cells/well. Each well was treated with a single concentration of analyte displayed over 5-fold dilutions from 0.0001  $\mu$ M to 50.0  $\mu$ M. For each analyses, 5-fold dilutions of etoposide (0.05  $\mu$ M - 50  $\mu$ M) and 1% DMSO were used as positive and negative controls, respectively. The cells were incubated for 24 h, 48 h or 72 h. At the end of the incubation period, cultures were treated with 1 mM 3-(4,5-dimethylthiazol-2-yl)-2,5-diphenyltetrazolium bromide (MTT) for 3 h, wherein viable cells being able to reduce the yellow MTT dye to a purple formazan product. Colorimetric analyses were conducted on a microplate reader (Beckman Coulter Inc.), using absorption readings at 570 nm. All experiments were conducted in triplicate and the deviation over these analyses has been reported. Data from these studies was presented in Table S2.

**C6. Cytotoxicity time-course studies.** Time course experiments were also conducted in HCT-116 cells to determine the window for optimal efficacy of **1**. Cells were exposed to **1** over for either 1 h, 3 h, 6 h, or 9 h followed by incubation in drug-free media for the remainder of a 24 h period. At the end of the incubation period, cell viability was quantified using the CellTiter96 One Solution Cell Proliferation Assay (Promega), following manufacture's instruction. Colorimetric analyses were conducted on a microplate reader (Molecular Devices), using absorption readings at 490 nm. All experiments were conducted in triplicate and the deviation over these analyses has been reported. Data from these studies was presented in Fig. 3b.

**C7. Validation of entry into autophagy.** Lysate was prepared in RIPA buffer (see Section B2) from HCT-116 cells that were cultured to  $1 \times 10^6$  cells/cm<sup>2</sup> in 75 cm<sup>2</sup> cell culture flasks over 24 h and then incubated with either 3  $\mu$ M **1**, 30  $\mu$ M **1**, 17  $\mu$ M etoposide (positive control), or 0.3% DMSO (negative control) for 24 h. Equal amounts of protein (30  $\mu$ g) as determined by the Lowry method were diluted in a 1:1 ratio with 2 $\times$  Laemmli sample buffer (BioRad Laboratories) and subjected to SDS PAGE (see Section B3) and western blot analysis using LC3A, LC3B and  $\beta$ -actin as the primary antibodies (see Section B4). Blots from this study are presented in Fig. 3c.

**C8. Cell cycle and DNA fragmentation analyses.** HCT-116 cells were seeded in 24-well plates and grown to  $5 \times 10^4$  cells/cm<sup>2</sup>, typically over a 24 h period. The cells were then treated with either 0.3  $\mu$ M **1**, 3  $\mu$ M **1**, 30  $\mu$ M **1**, 17  $\mu$ M etoposide (positive control) or 1% DMSO (negative control). Cells were then incubated for either 18 h or 24 h. After this period, the cells were recovered by treatment with 0.05% trypsin-EDTA solution (GIBCO-BRL). An 100  $\mu$ L aliquot of these cells was incubated for 30 min in the dark with a hypotonic solution containing 50  $\mu$ g/mL propidium iodide, 0.1% sodium citrate, and 0.1% Triton X-100. Cell cycle progression and DNA fragmentation were analyzed on an ImageStream system (Amnis). Five thousand events were acquired and data analyses were conducted using ModFit LT for Win32 version 3.1. Data from these studies were presented in Fig. 3d (DNA fragmentation, obtained from the subdiploid population) and Fig. 3e (cell cycle progression, obtained from the G0/G1, S and G2/M populations).

**C9. Western blot analysis of cell cycle progression.** HCT-116 cells were grown  $5 \times 10^4$  cells/cm<sup>2</sup> in a 75 cm<sup>2</sup> cell culture flasks typically over a 24 h period at which point they were treated with media containing either 3  $\mu$ M **1**, 30  $\mu$ M **1**, 17  $\mu$ M etoposide (positive control) or 0.3% DMSO (negative control). After incubation for 24 h, cell lysates were prepared in RIPA buffer (see Section B2). Samples of lysates containing 30  $\mu$ g of protein were subjected western blot analysis (see Section B4) using cyclin A2, cyclin B1, cyclin D1, cyclin D2, cyclin D3, cyclin E1, cyclin E2, or cyclin H as the primary antibodies. The experiment remained comparable over three repetitions and exemplary blots are presented in Fig. 3f.

**C10. Western blot analysis of apoptotic markers.** HCT-116 cells were grown to  $5 \times 10^4$  cells/cm<sup>2</sup> in a 75 cm<sup>2</sup> cell culture flasks typically over a 24 h period at which point they were treated with media containing either 3  $\mu$ M **1**, 30  $\mu$ M **1**, 17  $\mu$ M etoposide (positive control) or 0.3% DMSO (negative control). After incubation for 24 h, cell lysates were prepared in RIPA buffer (see Section B2). Samples of lysates containing 30  $\mu$ g of protein were subjected western blot analysis (see Section B4) using caspase-3, cleaved caspase-3, caspase 7, cleaved caspase-7, caspase-9, cleaved caspase-9, PARP, cleaved PARP, as the primary antibodies. The experiment remained comparable over three repetitions and exemplary blots are presented in Fig. 3g (caspase activity) and Fig. 3g (cyclin activity).

**C11. Immunoprecipitation with probe 15.** An aliquot of 1.3 mM stock of probe **15** in DMSO was added to 1 mL of cell lysate prepared in PBS (see Section B2) containing 1 mg/mL of net protein to provide a solution of cell lysate containing either 3  $\mu$ M **15** or 30  $\mu$ M **15**. An aliquot of these solutions (1 mL) was subjected to IP analysis using 100  $\mu$ L the resin bearing 1.5 mg/mL of covalently attached anti-IAF XRI-TF35 mAb (see Section B6). This study was repeated on three different cell lysates and representative images of silver stained SDS PAGE gels are provided in Fig. 4a.

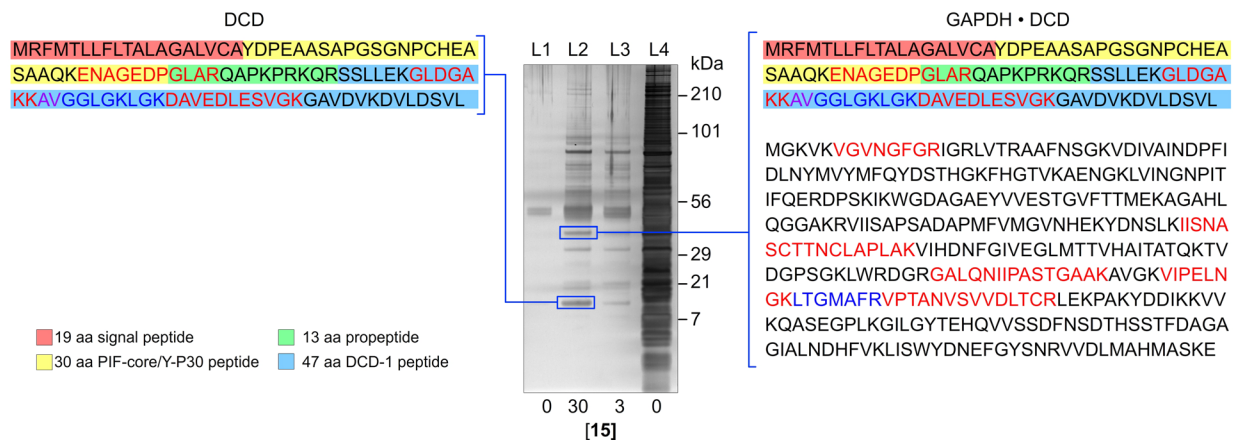

**Figure S1 | Protein ID via LC-MS/MS analyses.** (left) Data depicting the LC-MS/MS analysis of a band at 12 kDa returned peptides observed in DCD. (right) Data depicting the LC-MS/MS analysis of a band at 50 kDa returned peptides observed in DCD and glyceraldehyde 3-phosphate dehydrogenase (GAPDH). This data serves to further support that provided in Fig. 4a. Peptides identified are colored in either red or blue. Regions of the DCD protein are shaded in either red, yellow, green or blue as indicated within the figure.

**C12. Target identification.** Silver stained bands were excised from the corresponding SDS-PAGE gel and destained using the SilverQuest kit (Life Technologies) according to the

manufacturers protocols. The destained bands were submitted to LC-MS/MS Protein-ID analysis conducted by the Biomolecular and Proteomics Mass Spectrometry Facility at UC San Diego. Each band was subjected to an in gel trypsin-digestion and peptides were analyzed by LC-MS/MS using a QSTAR-Elite hybrid mass spectrometer (AB/MDS Sciex) interfaced to a nanoscale reversed-phase high-pressure liquid chromatograph (Tempo) using a 10 cm 180 ID glass capillary packed with 5  $\mu\text{m}$  C<sub>18</sub> Zorbax beads (Agilent). The buffer compositions were as follows: buffer A was composed of 98% H<sub>2</sub>O, 2% CH<sub>3</sub>CN, 0.2% formic acid, and 0.005% trifluoroacetic acid (TFA) and buffer B was composed of 100% CH<sub>3</sub>CN, 0.2% formic acid, and 0.005% TFA. Peptides were eluted from the C<sub>18</sub> column into the mass spectrometer using a linear gradient of 5-60% buffer B over 60 min at 400  $\mu\text{l}/\text{min}$ . LC-MS/MS data were acquired in a data-dependent fashion by selecting the 4 most intense peaks with charge state of 2 to 4 that exceeds 20 counts, with exclusion of former target ions set to "360 seconds" and the mass tolerance for exclusion set to 100 ppm. Time-of-flight MS were acquired at  $m/z$  400 Da to  $m/z$  1600 Da for 1 s with 12 time bins to sum. MS/MS data were acquired from ions  $m/z$  of 50 Da to  $m/z$  of 2,000 Da by using enhance all and 24 time bins to sum, dynamic background subtract, automatic collision energy, and automatic MS/MS accumulation with the fragment intensity multiplier set to 6 and maximum accumulation set to 2 s before returning to the survey scan. Peptide identifications were made using paragon algorithm executed in Protein Pilot 2.0 software (Life Technologies). Representative peptide maps are provided in Fig. 4a and Fig. S1.

**C13. Metabolic conversion studies (Fig. S2).** A 1.1 mM solution of **16** in DMSO (80  $\mu\text{L}$ ) or 1.9 mM solution of **2** in DMSO (80  $\mu\text{L}$ ) was added to 1 mL of HCT-116 cell lysate containing 1 mg/mL of total protein (see Section B2). The samples were incubated at either 0°C, rt, or 37°C for 96 h. The samples were extracted with CH<sub>2</sub>Cl<sub>2</sub> (3  $\times$  1 mL), washed with water (1  $\times$  1 mL) then brine (1  $\times$  1 mL). Alternatively, cells were treated with **2** or **16** for an ascribed period. After incubation, cell lysates were prepared according standard protocols (see Section B2). The lysate samples were then extracted with CH<sub>2</sub>Cl<sub>2</sub> (3  $\times$  1 mL), washed with water (1  $\times$  1 mL) then brine (1  $\times$  1 mL). For both approaches, the conversion of **2** and **16** to **1** and **15** were then determined using LC-HRMS analysis as shown in Fig. S2.

**C14. Immunoprecipitation with probe 16.** An aliquot of a 1.1 mM stock of probe **16** in DMSO was added to 1 mL of cell lysate prepared in PBS (see Section B2) containing 1 mg/mL in net protein to provide a solution of cell lysate containing either 20  $\mu\text{M}$  **16**, 30  $\mu\text{M}$  **16**, or 40  $\mu\text{M}$  **16**. Aliquot of these solution (1 mL) were subjected to IP analysis (see Section B6). This study was repeated on three different cell lysates and representative images of silver stained gels are provided in L4-L5, Fig. 4b.

**C15. Live cell immunoprecipitation with probe 16.** A 1.1 mM solution of **16** in DMSO (30  $\mu\text{L}$ ) was added to 25 mL of media covering HCT-116 cells cultivated to  $1 \times 10^6$  cells/cm<sup>2</sup> on a 75 cm<sup>2</sup> cell culture flask to afford a final concentration of 30  $\mu\text{M}$  **16**. The dish was incubated for 24 h at 37°C. The cells were washed with PBS (3  $\times$  5 mL), suspended in 5 mL of PBS, and frozen at -80°C. The flask was removed from the freezer and thawed on ice. Cells were collected and lysate was prepared in PBS (see Section B2). An aliquot of this solution (1 mL) was subjected to IP analysis (see Section B6) and evaluated by SDS PAGE analysis (see Section B3). This study was repeated on three different cell lysates and representative images of silver stained gels are provided in L7-L8 in Fig. 4b.

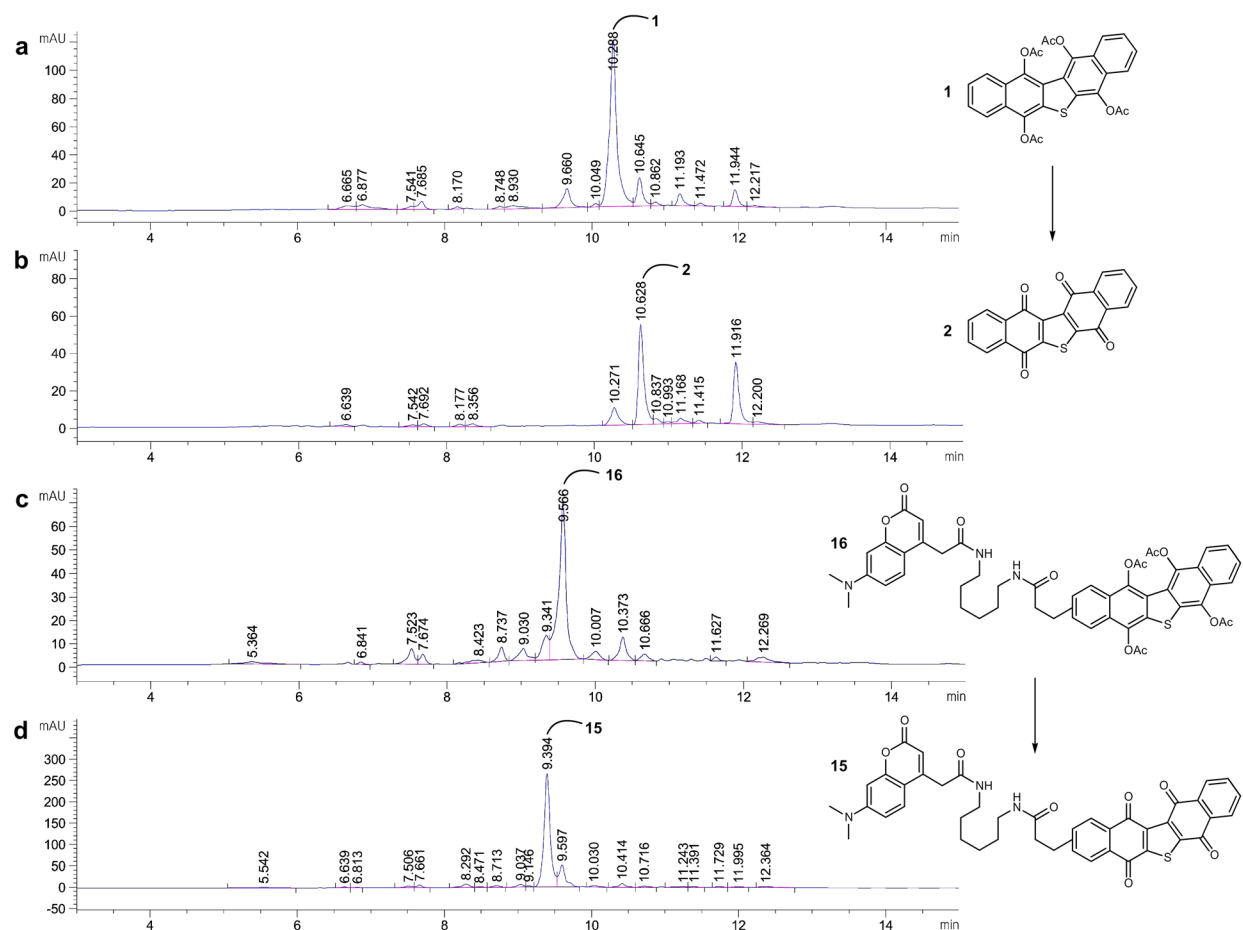

**Figure S2** | Peracetate **2** and probe **16** are converted to **1** and **15**, respectively, in HCT-116 cell lysate. **a**, LC/MS trace depicting extracts from HCT-116 cell lysate that were treated with 150  $\mu\text{M}$  **2** for 24 h. **b**, LC/MS trace depicting extracts from HCT-116 cell lysate that were treated with 150  $\mu\text{M}$  **2** for 96 h. **c**, LC/MS trace depicting extracts from HCT-116 cell lysate that were treated with 90  $\mu\text{M}$  **16** for 24 h. **d**, LC/MS trace depicting extracts from HCT-116 cell lysate that were treated with 90  $\mu\text{M}$  **16** for 96 h. Unless otherwise stated, cell lysates contained containing  $\sim 1$  mg/mL in total protein.

**C16. Iodoacetamide treatment after immunoprecipitation.** A 20  $\mu\text{L}$  aliquot of immunoprecipitated fraction from Section C11 was treated with 5 mM iodoacetamide (freshly prepared). After 1 h at 23 $^{\circ}\text{C}$ , the resulting fraction was diluted in a 1:1 ratio with 2  $\times$  Laemmli sample buffer (Bio-Rad Laboratories) and evaluated by SDS PAGE analysis (Section B3). This study was repeated on three different cell lysates and representative images of silver stained gels were provided in L10, Fig. 4c.

**C17. Iodoacetamide treatment before immunoprecipitation.** Cell lysate (5 mL) containing 1 mg/mL in net protein prepared in PBS (see Section B2) was treated with 0.5 mM iodoacetamide for 1 h at 4 $^{\circ}\text{C}$ . The remaining iodoacetamide was removed by spin dialysis with PBS (5  $\times$  10 mL). Probe **15** was added from a 1.3 mM DMSO stock to provide to provide a final concentration of 30  $\mu\text{M}$  **15** in the cell lysate. An aliquot of this solution (1 mL) was subjected to IP analysis (see Section B6) and evaluated by SDS PAGE analysis (see Section B3). This study

was repeated on three different cell lysates and representative images of silver stained SDS PAGE gels were provided in L11, Fig. 4c.

**C18. Western blot validation with probe 15.** A 20  $\mu$ L aliquot of the IP fraction from Section C11 from lysate treated with 30  $\mu$ M **15** was diluted in a 1:1 ratio with 2  $\times$  Laemmli sample buffer (Bio-Rad Laboratories) and subjected to western blot analysis (see Section B4) using the anti-IAF XRI-TF35 (L12-L13), DCD (L14) and GAPDH (L15) as the primary antibodies. Blots from these analyses were provided in L12-L15, Fig. 4d.

**C19. Western blot validation with probe 16.** A 20  $\mu$ L aliquot of the IP fraction from Section C14 or Section C15 was diluted in a 1:1 ratio with 2  $\times$  Laemmli sample buffer (Bio-Rad Laboratories) and subjected to western blot analysis (see Section B4) using the DCD GAPDH as the primary antibodies. Blots from these analyses were provided in L17-L18, Fig. 4e.

**C20. qPCR analysis (Fig. 4g).** HCT-116 ( $5 \times 10^4$  cells/cm<sup>2</sup>), Malme-3M ( $2.5 \times 10^4$  cells/cm<sup>2</sup>) and PC3M ( $5 \times 10^4$  cells/cm<sup>2</sup>) cells were seeded in 5 mL six-welled dishes. After growth for 24 h, the cells were treated with 0.3 % DMSO (negative control), 15  $\mu$ M etoposide (positive control), 3  $\mu$ M **1** or 30  $\mu$ M **1** in HCT-116 and PC-3M cells, and 30 and 100 nM in Malme-3M cells, and incubated for an additional 24 h. Total RNA was extracted for all samples using the RNeasy Mini Kit (Qiagen). RNA samples were quantified by absorbance measures at 260 nm on microvolume spectrophotometer (Thermo Scientific). Purity of samples was determined by the ratio between measurements at 260 nm and 280 nm. After isolation and quantification, RNA was converted into cDNA by reaction with reverse transcriptase (RT) using an iScript cDNA Synthesis Kit (BioRad) with 4  $\mu$ L reaction buffer, 1  $\mu$ L RT enzyme stock, 500 ng total RNA, diluted with ultrapure H<sub>2</sub>O to a final volume of 20  $\mu$ L. The newly synthesized cDNA was then subjected to a q-PCR reaction conducted on an iQ5 thermocycler (BioRad) using the reagent SYBR Green PCR Master Mix (Applied Biosystems) with 10  $\mu$ L SYBR, 0.4  $\mu$ L Primer F, 0.4  $\mu$ L Primer R, 1  $\mu$ L cDNA, diluted with ultrapure H<sub>2</sub>O to a final volume of 20  $\mu$ L. PCR reactions were conducted using the following conditions: initial denaturation at 95 °C for 10 min, followed by 50 cycles at 95°C for 15 s and 58°C for 1 min. The dissociation curve that followed amplification consisted of 75 cycles from 58 °C to 95 °C for 15 s, varying the temperature by 0.5 °C per cycle. Primers (Invitrogen) for DCD (DCD F: AAGCCAAGGAAGCAGAGATCC and DCD R: GCTCCTTTACCCACGCTTTCT) were designed using the OligoPerfect Designer software (Invitrogen), which generated an amplicon with 125 bp. The gene RPLPO (RPLPO F: GCAATGTTGCCAGTGTCTG and RPLPO R: GCCTTGACCTTTTCAGCAA; Invitrogen), which generated an amplicon with 142 bp, was used as internal control, for normalization. Quantitative parameters were obtained by values of the C<sub>T</sub> (threshold cycle), where the signal associated to amplification of the PCR product during the exponential phase is first detected. Calculation to measure relative expression of analyzed genes was based on the 2<sup>- $\Delta\Delta$ CT</sup> method [Kenneth J. Livak, Thomas D. Schmittgen, Analysis of Relative Gene Expression Data Using Real-Time Quantitative PCR and the 2<sup>- $\Delta\Delta$ CT</sup> Method, Methods, Volume 25, Issue 4, December 2001, Pages 402-408]. Data from these analyses were provided in Fig. 4g.

**C21. Confocal image analysis of probe 15.** HCT-116 cells were treated with 5  $\mu$ M **15** to 30  $\mu$ M probe **15** over 8 h and imaged was imaged under conventional conditions (see Section B5). An exemplary image is provided in Fig. S3.

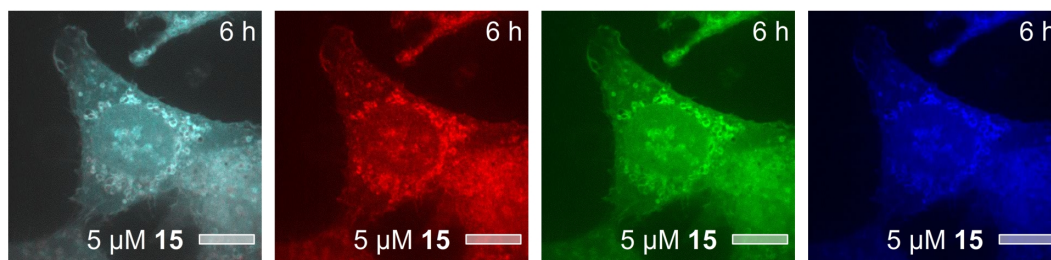

**Figure S3** | The IAF probe **15** undergoes comparable localization in the ER and transitioning into the autophagosomes. The image depicts HCT-116 cells that were treated with 5  $\mu\text{M}$  **15** for 6 h. The presence of blue fluorescence from the IAF tag in **15** overlapped with the red and green fluorescence from the seriniquinone core, indicating that probe **15** provides an accurate mimic of **1**.

## C22. Cell selectivity and bioactivity data (Table S2).

| cell line | IC <sub>50</sub> values ( $\mu\text{M}$ ) after treatment for 72 h |                 |                 |                 |                 |
|-----------|--------------------------------------------------------------------|-----------------|-----------------|-----------------|-----------------|
|           | <b>1</b>                                                           | <b>2</b>        | <b>10</b>       | <b>17</b>       | <b>18</b>       |
| Malme-3M  | 0.03 $\pm$ 0.01                                                    | 0.02 $\pm$ 0.01 | 0.02 $\pm$ 0.01 | 0.18 $\pm$ 0.09 | 0.03 $\pm$ 0.01 |
| SW-620    | 0.23 $\pm$ 0.23                                                    | –               | 0.36 $\pm$ 0.04 | 1.68 $\pm$ 0.24 | 0.05 $\pm$ 0.01 |
| Colo 205  | 1.03 $\pm$ 0.14                                                    | –               | 0.63 $\pm$ 0.07 | 2.42 $\pm$ 0.64 | 0.04 $\pm$ 0.01 |
| WIDR      | 0.72 $\pm$ 0.46                                                    | –               | –               | 1.85 $\pm$ 1.12 | 0.04 $\pm$ 0.01 |
| HCT-116   | 0.99 $\pm$ 0.19                                                    | 0.36 $\pm$ 0.03 | 0.37 $\pm$ 0.12 | 2.90 $\pm$ 0.54 | 0.84 $\pm$ 0.08 |
| OVCAR-8   | 0.58 $\pm$ 0.12                                                    | 1.21 $\pm$ 0.30 | 0.36 $\pm$ 0.22 | 3.34 $\pm$ 0.51 | 0.68 $\pm$ 0.18 |
| SF-295    | 0.28 $\pm$ 0.08                                                    | 1.01 $\pm$ 0.25 | 0.11 $\pm$ 0.05 | 0.74 $\pm$ 0.12 | 0.21 $\pm$ 0.03 |
| HL-60     | 0.94 $\pm$ 0.04                                                    | 0.71 $\pm$ 0.16 | 0.41 $\pm$ 0.12 | 2.79 $\pm$ 0.32 | 0.46 $\pm$ 0.16 |
| PC-3M     | 2.07 $\pm$ 1.04                                                    | 2.12 $\pm$ 0.33 | –               | –               | –               |

**Table S2** | Cell selectivity and bioactivity remains consistent over a panel of derivatives. Structures appear in Fig. 1. Malme-3M, HCT-116 and PC-3M cell lines were used for the biological studies. These data along with the NCI screening data (see pages S34-S51) define the melanoma selectivity described herein.

$^1\text{H}$ -NMR (500 MHz) and  $^{13}\text{C}$ -NMR (125 MHz) spectra of seriniquinone **1** in  $\text{CDCl}_3$

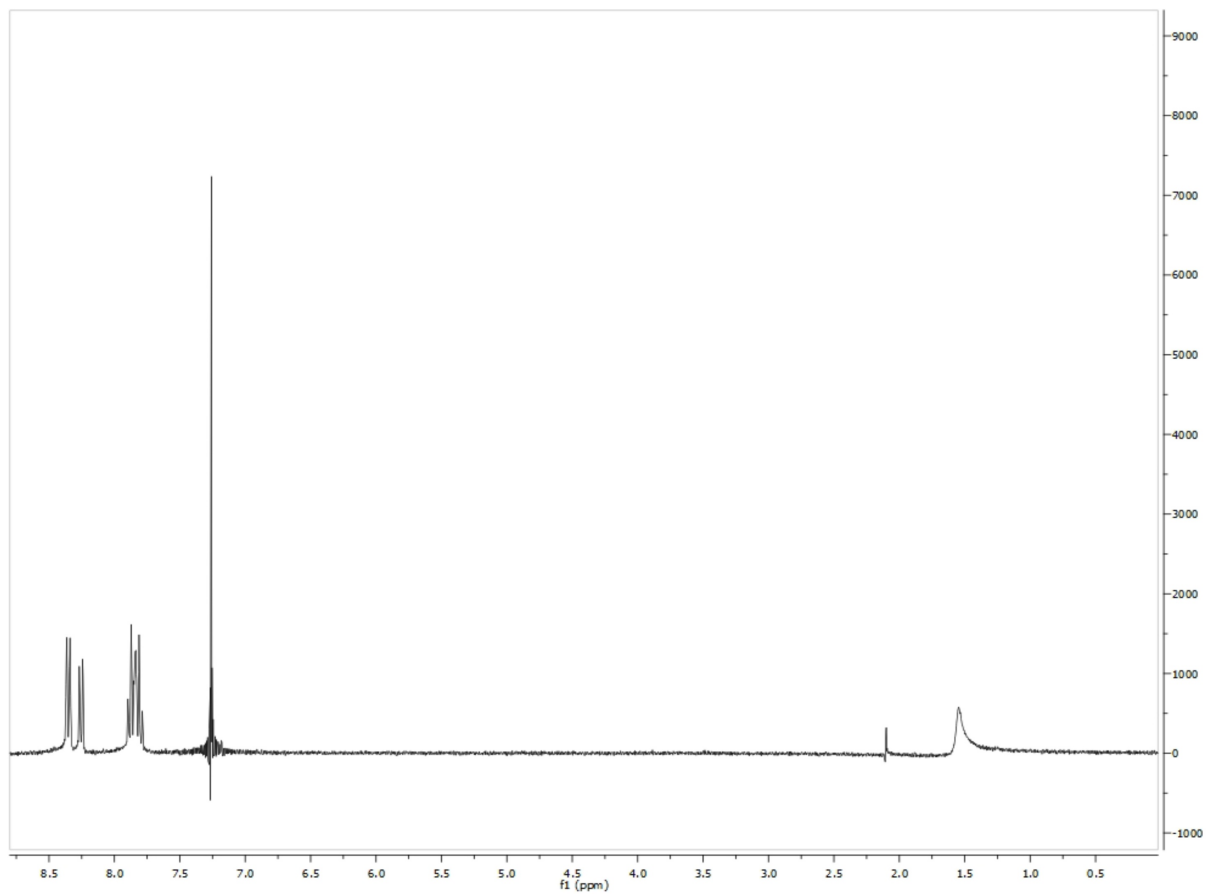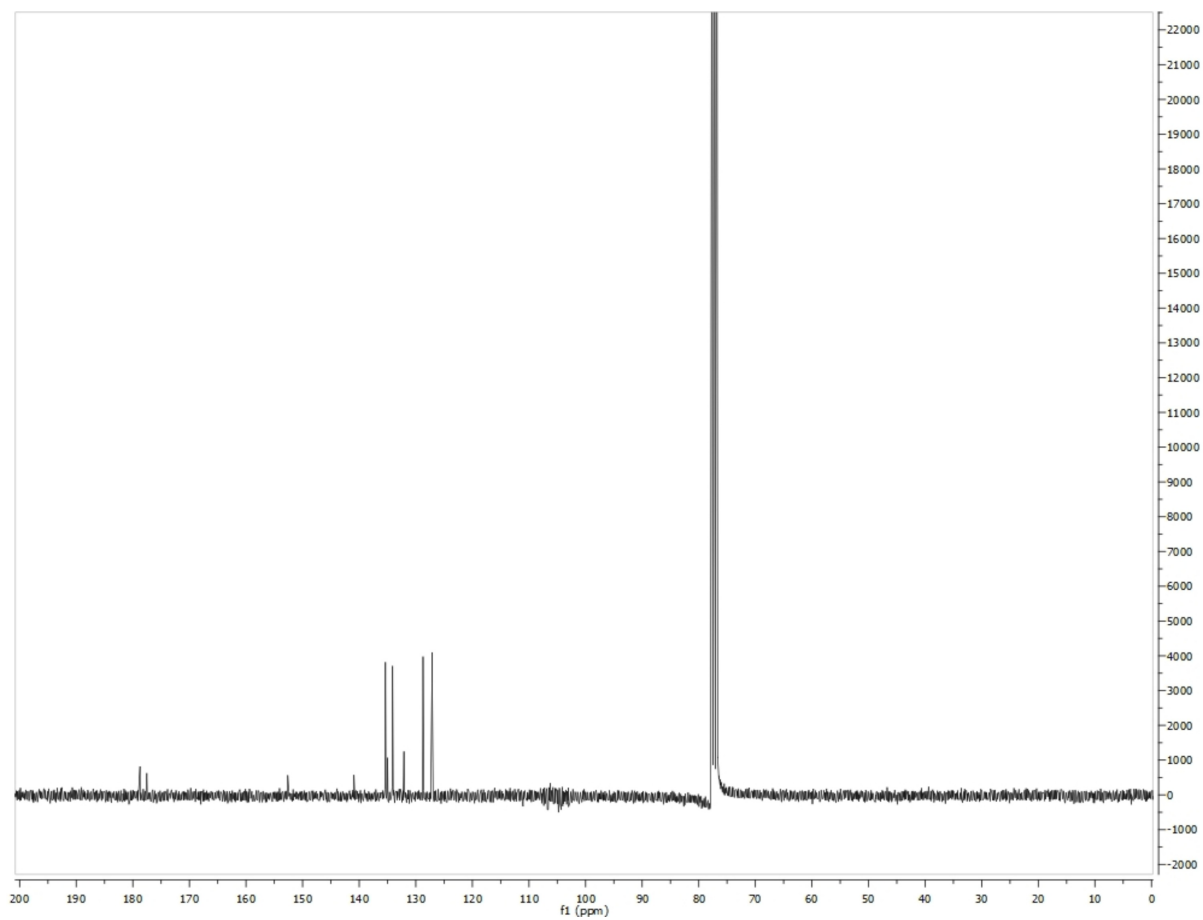



$^1\text{H}$ ,  $^1\text{H}$ -gCOSY (500 MHz) and  $^1\text{H}$ ,  $^{13}\text{C}$ -HSQC (125 MHz) spectra of seriniquinone **1** in  $\text{CDCl}_3$

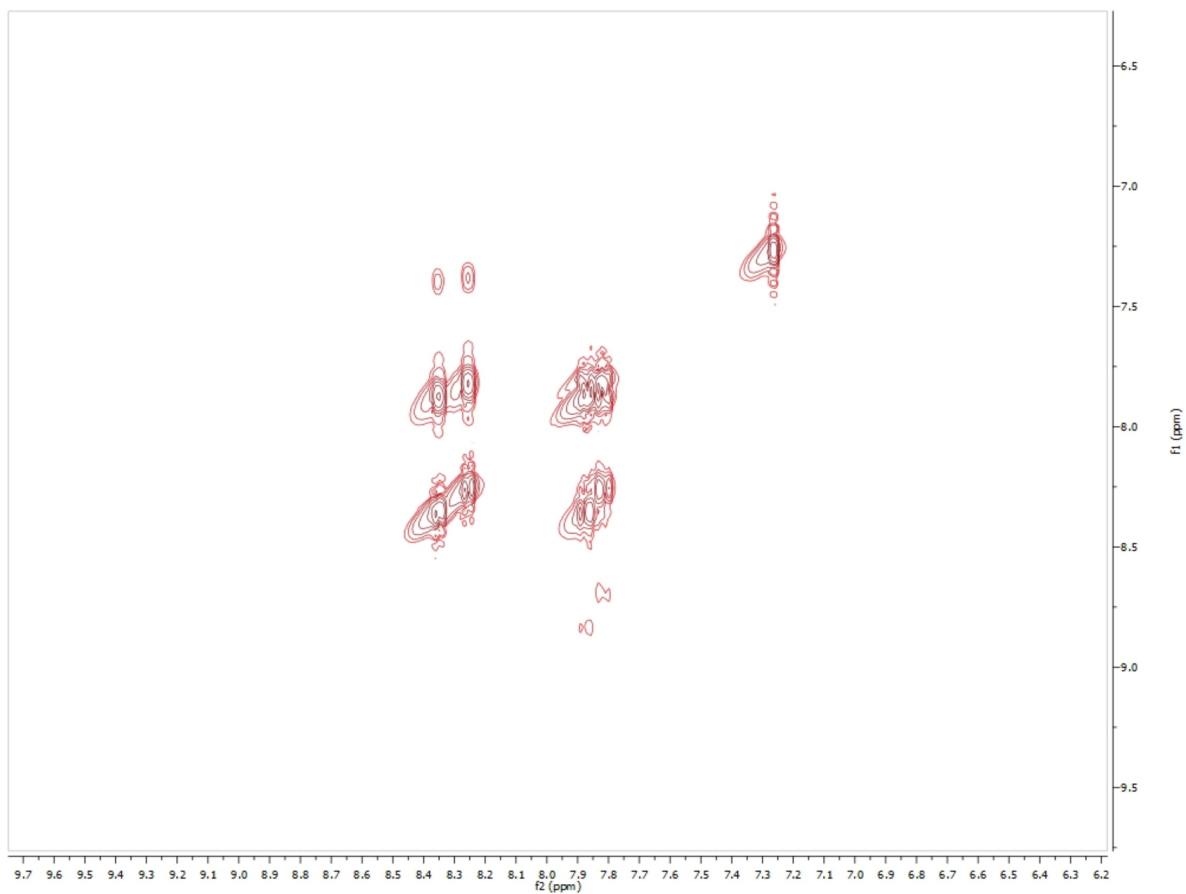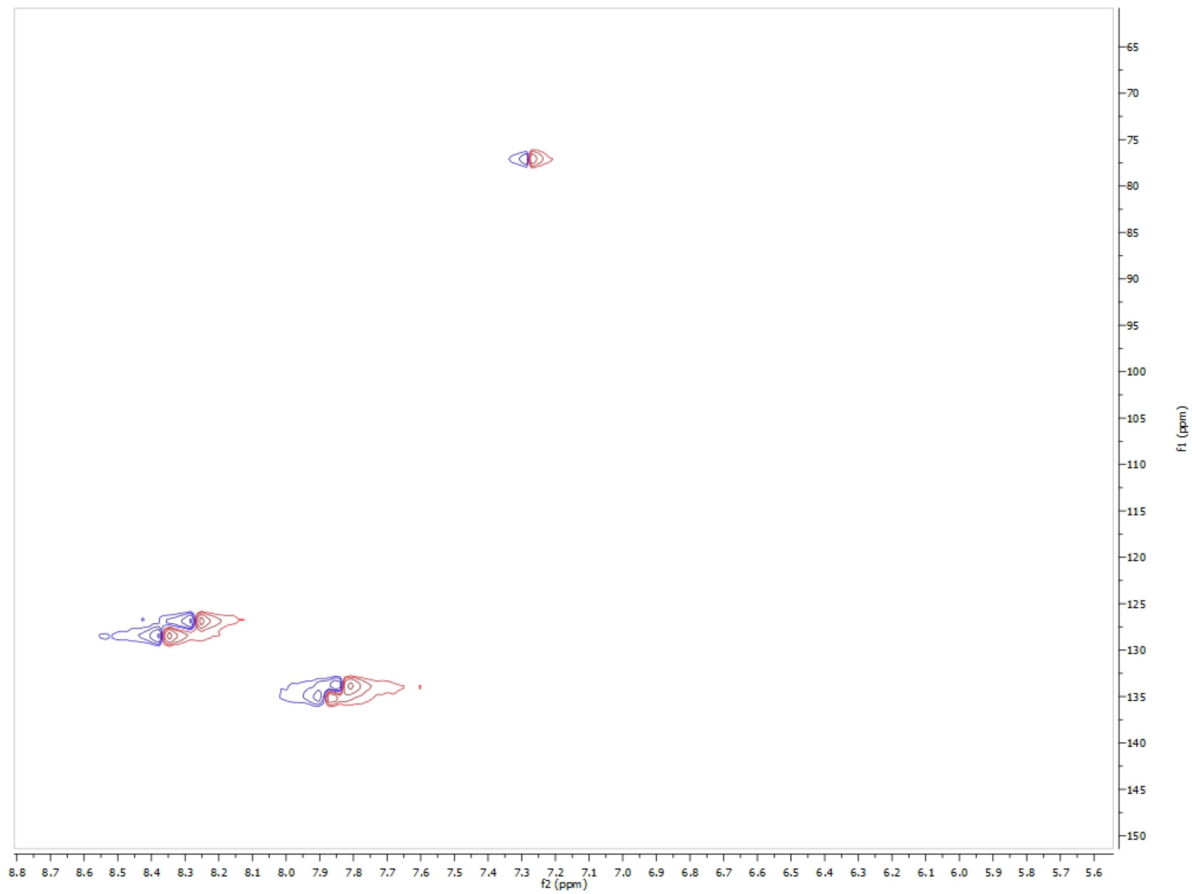

$^1\text{H}$ ,  $^{13}\text{C}$ -HSQC (400 MHz) spectra of seriniquinone **1** in  $\text{CDCl}_3$

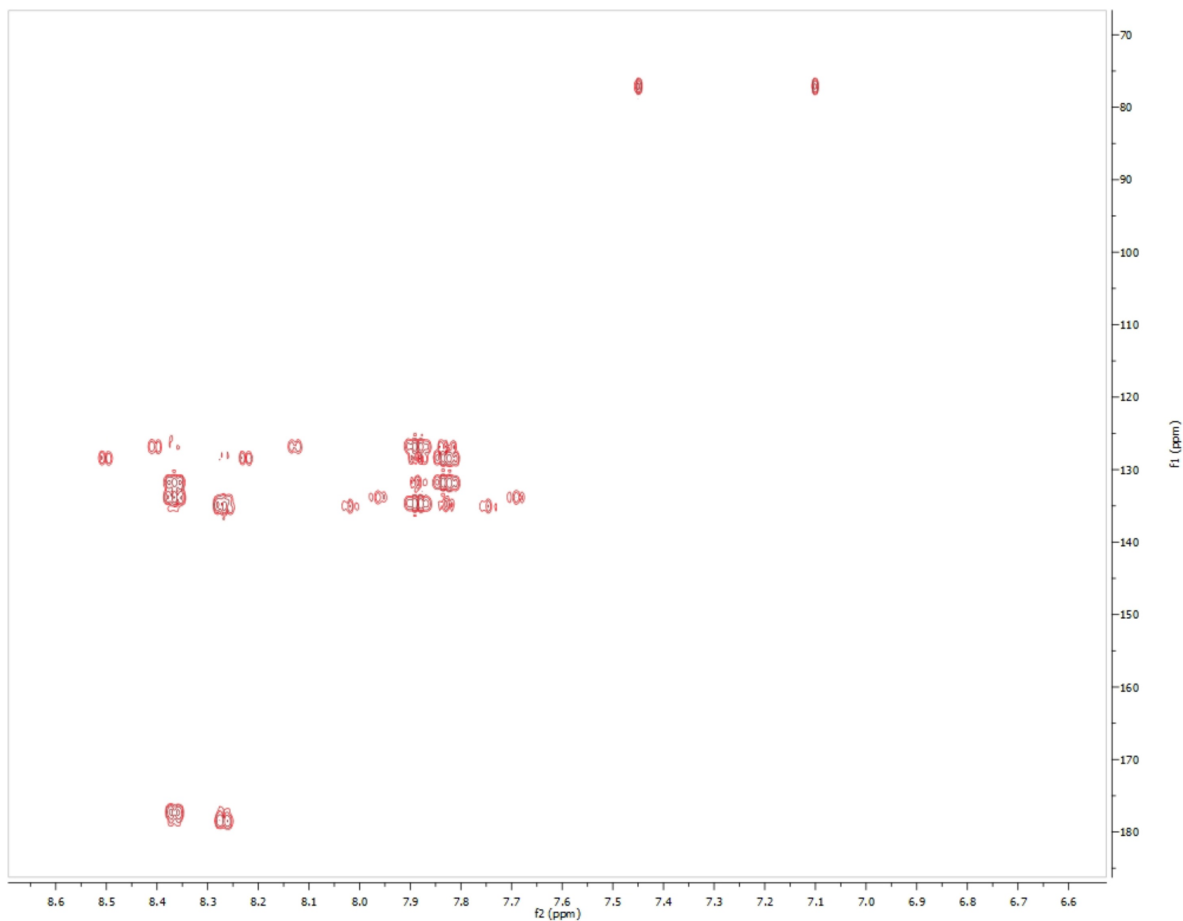

HPLC evaluation of synthetic and natural seriniquinone (**1**)

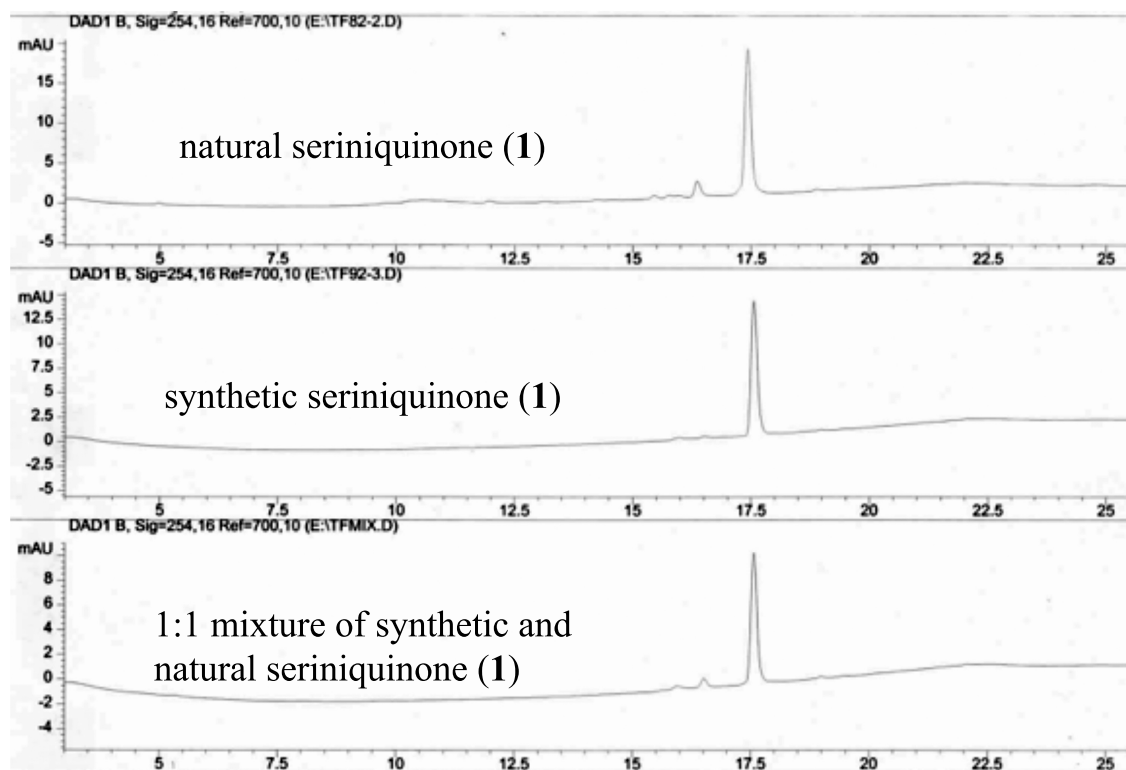

$^1\text{H}$ -NMR (500 MHz) and  $^{13}\text{C}$ -NMR (125 MHz) spectra of tetracetate **2** in  $\text{CDCl}_3$

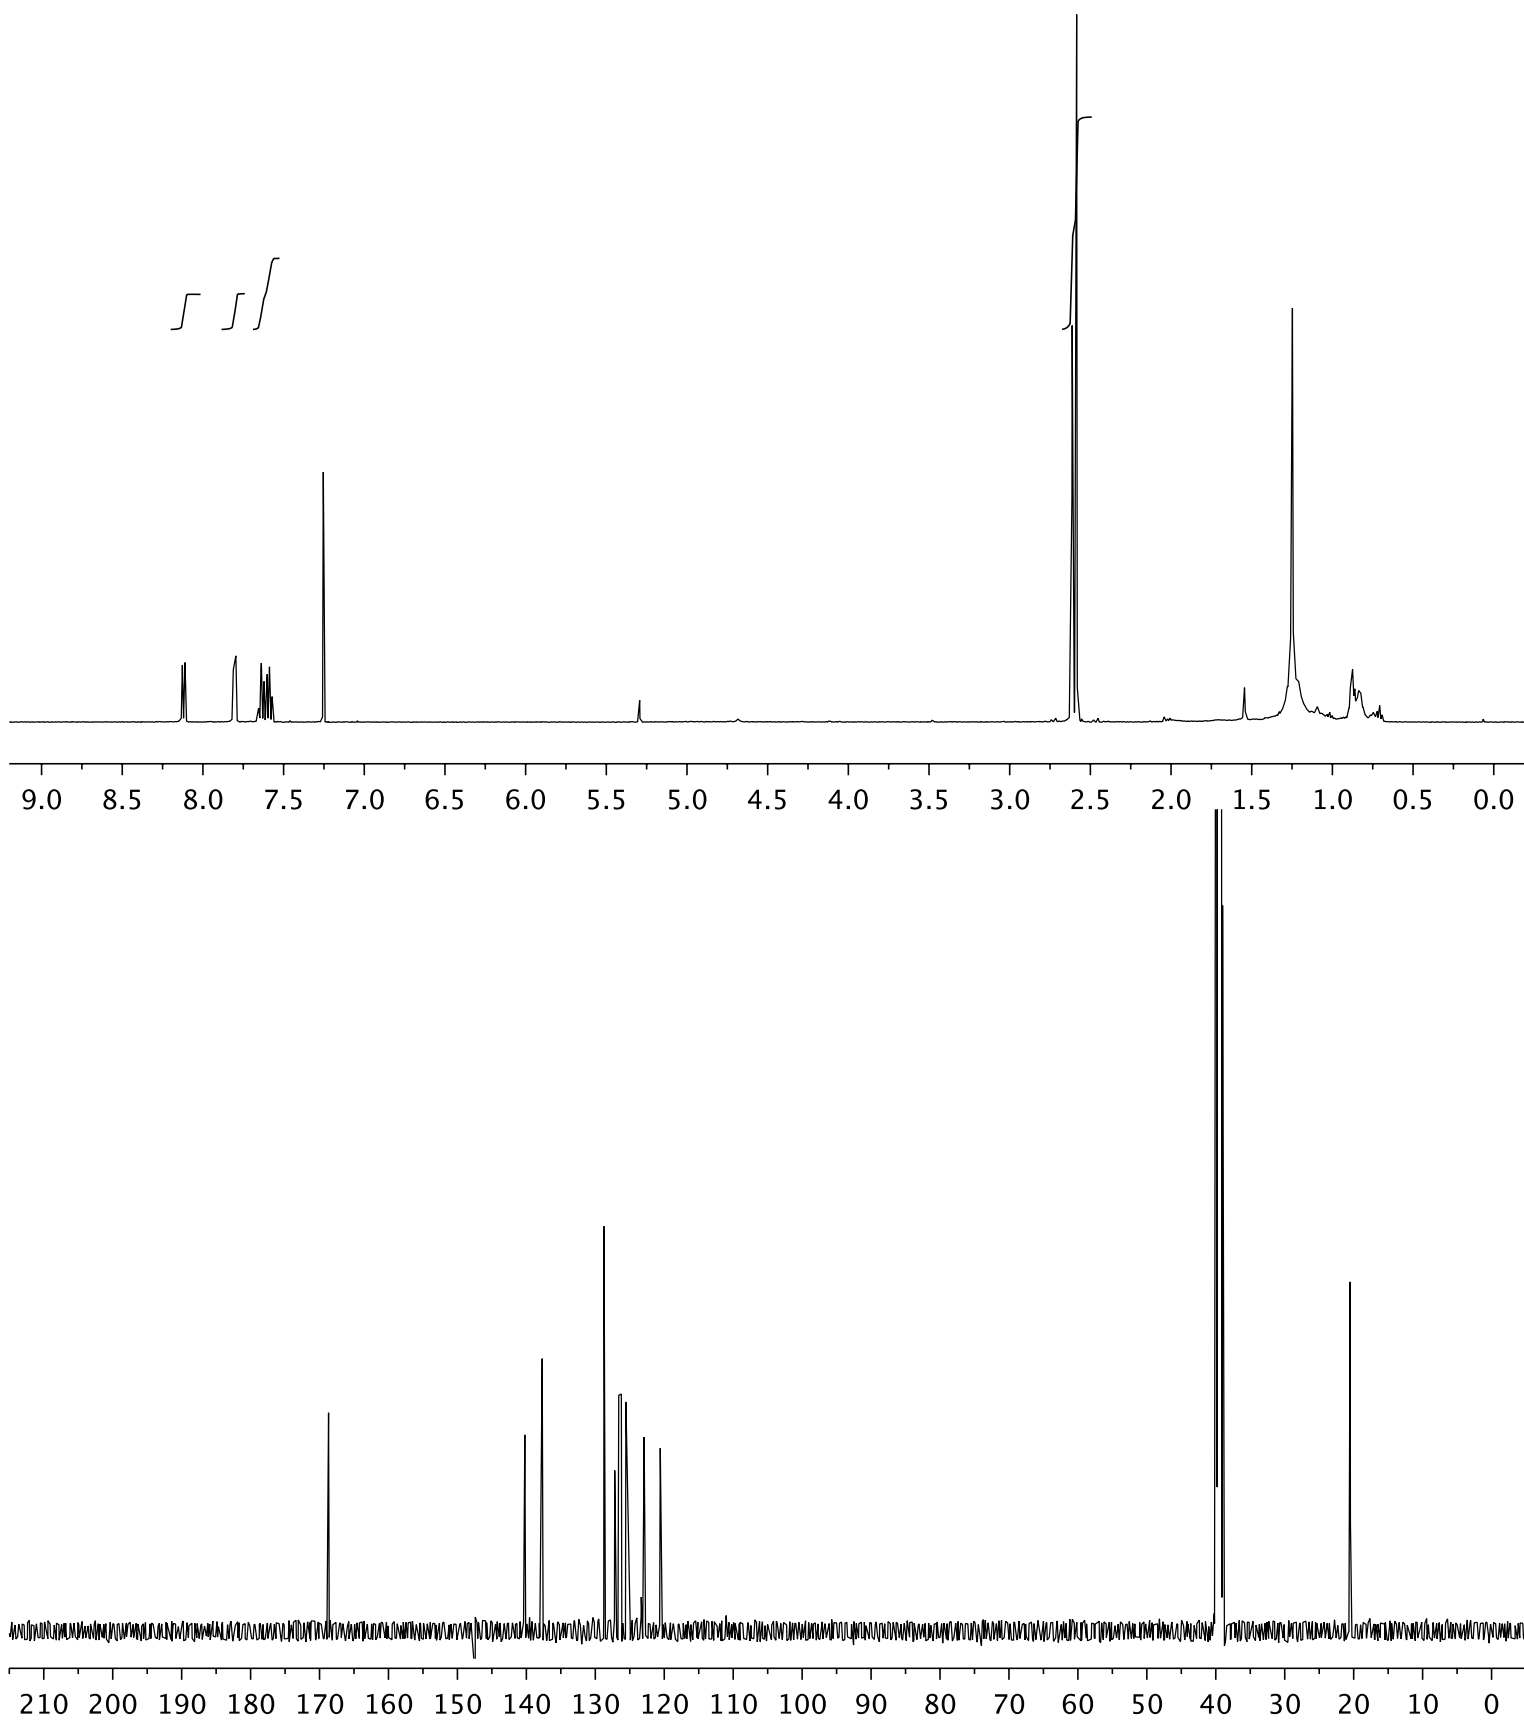

$^1\text{H}$ -NMR (500 MHz) and  $^{13}\text{C}$ -NMR (125 MHz) spectra of adduct **7** in  $\text{CDCl}_3$

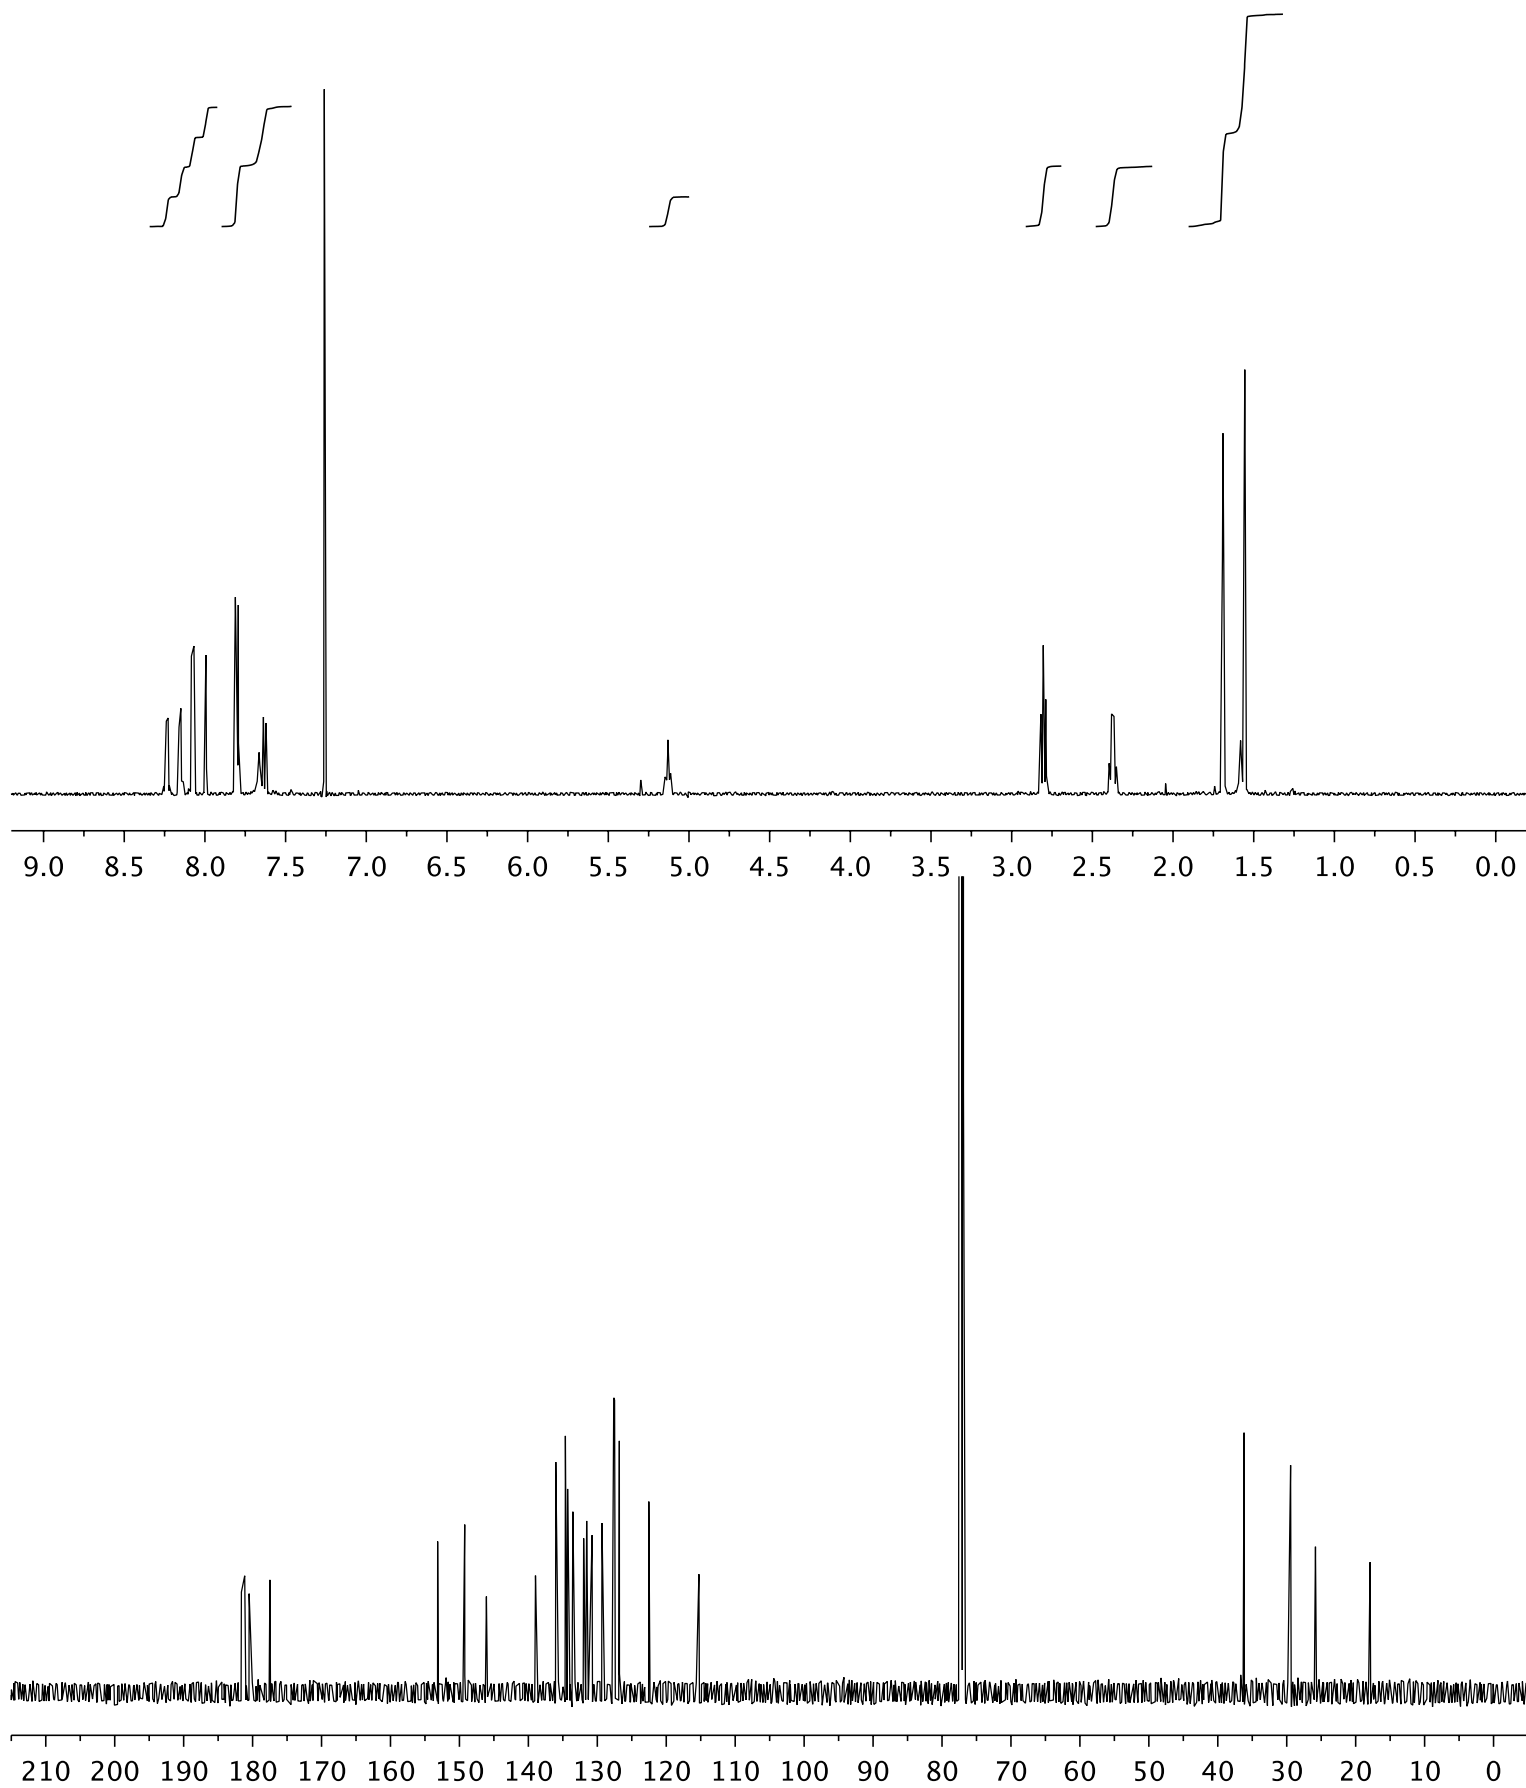

$^1\text{H}$ -NMR (500 MHz) and  $^{13}\text{C}$ -NMR (125 MHz) spectra of dichloride **8** in  $\text{CDCl}_3$

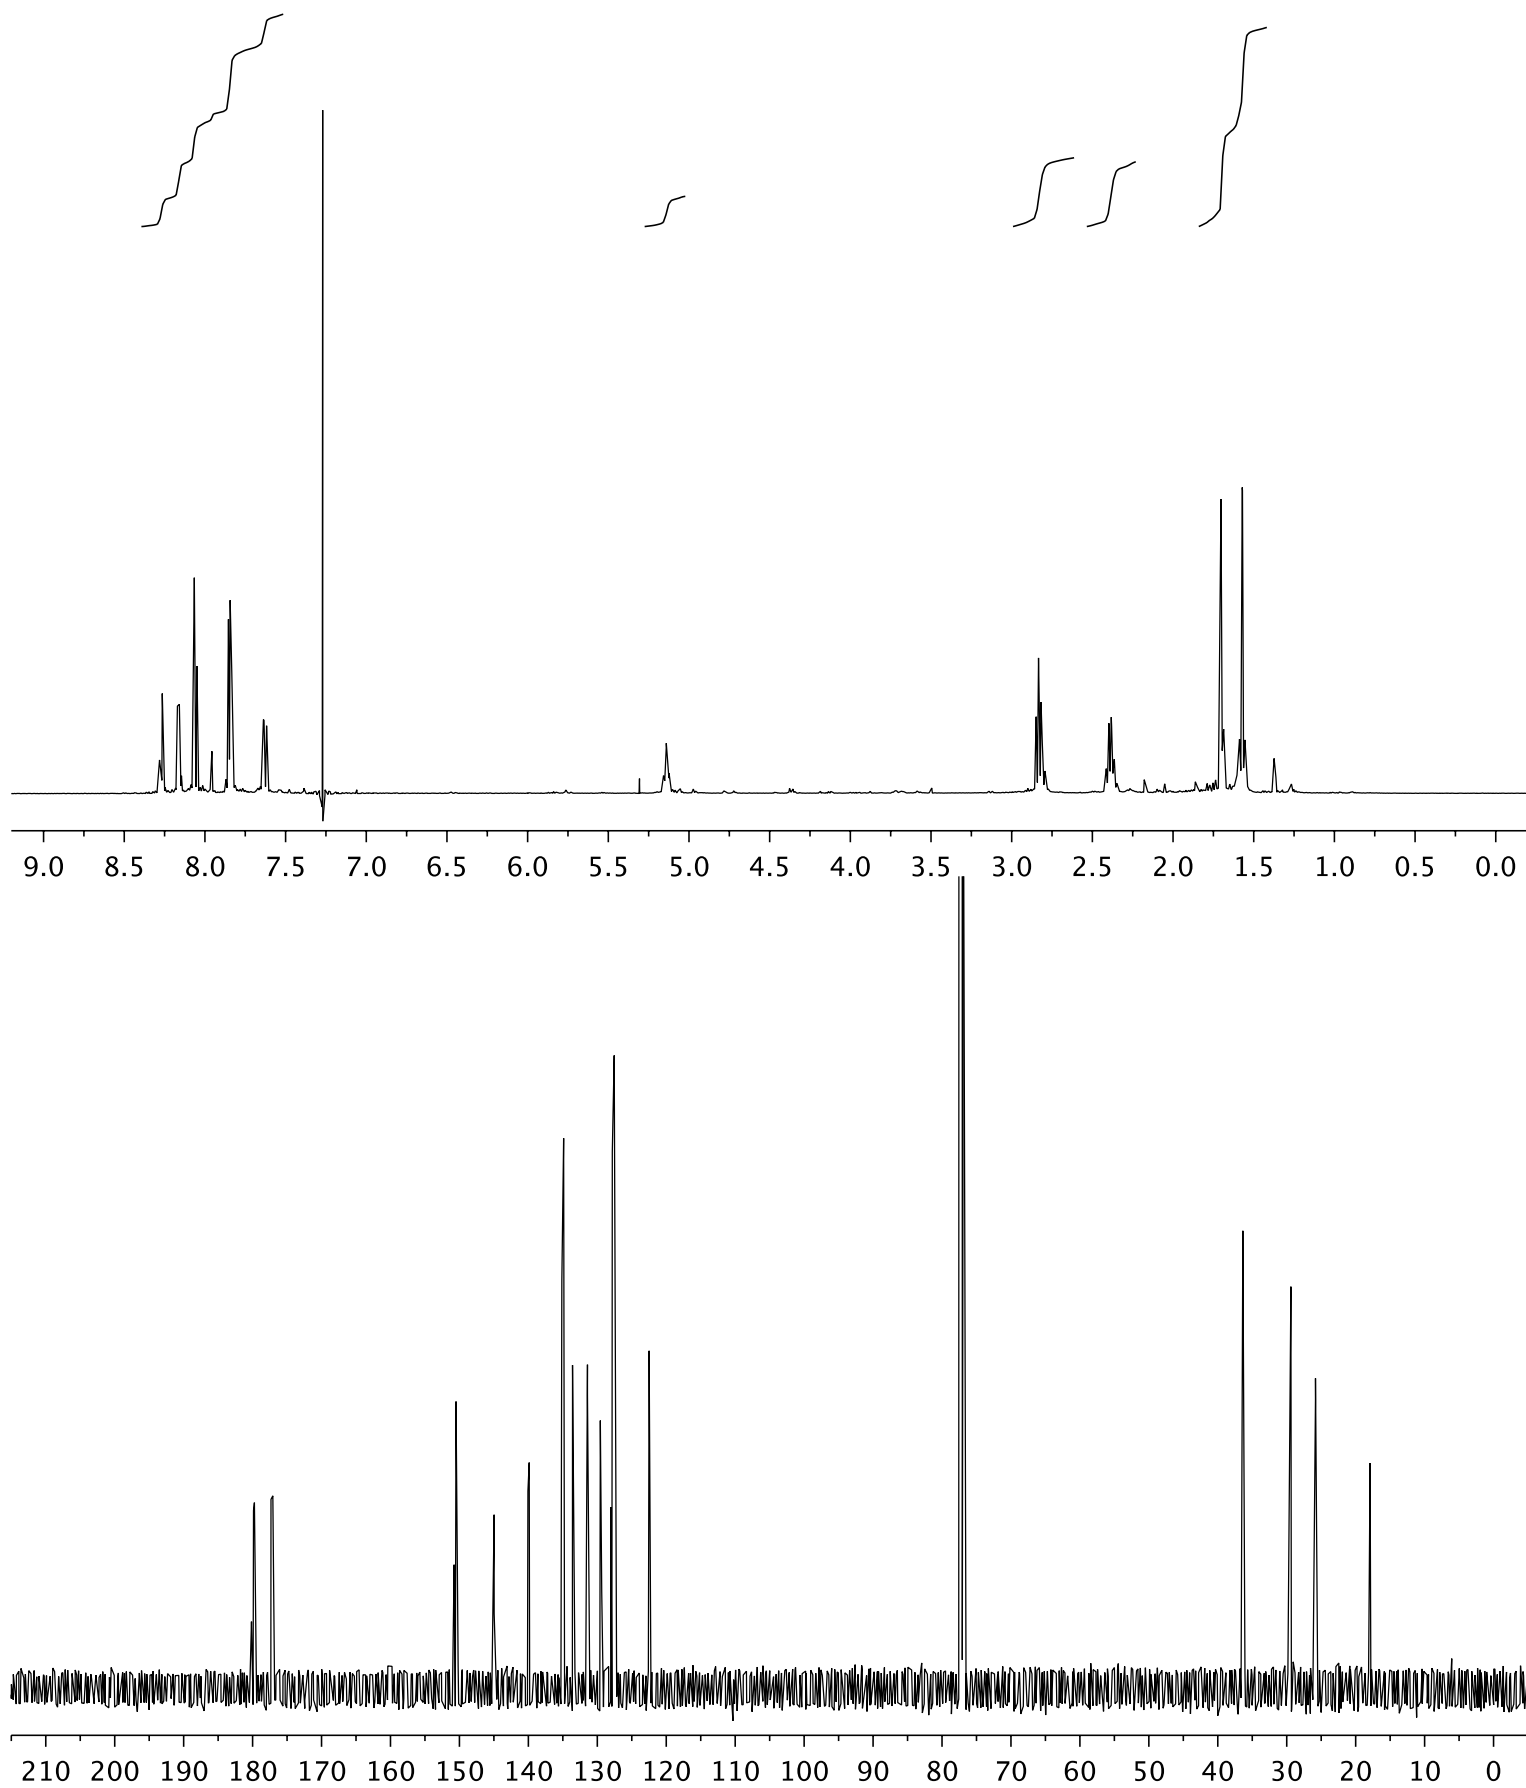

$^1\text{H}$ -NMR (500 MHz) and  $^{13}\text{C}$ -NMR (125 MHz) spectra of alkene **9** in  $\text{CDCl}_3$

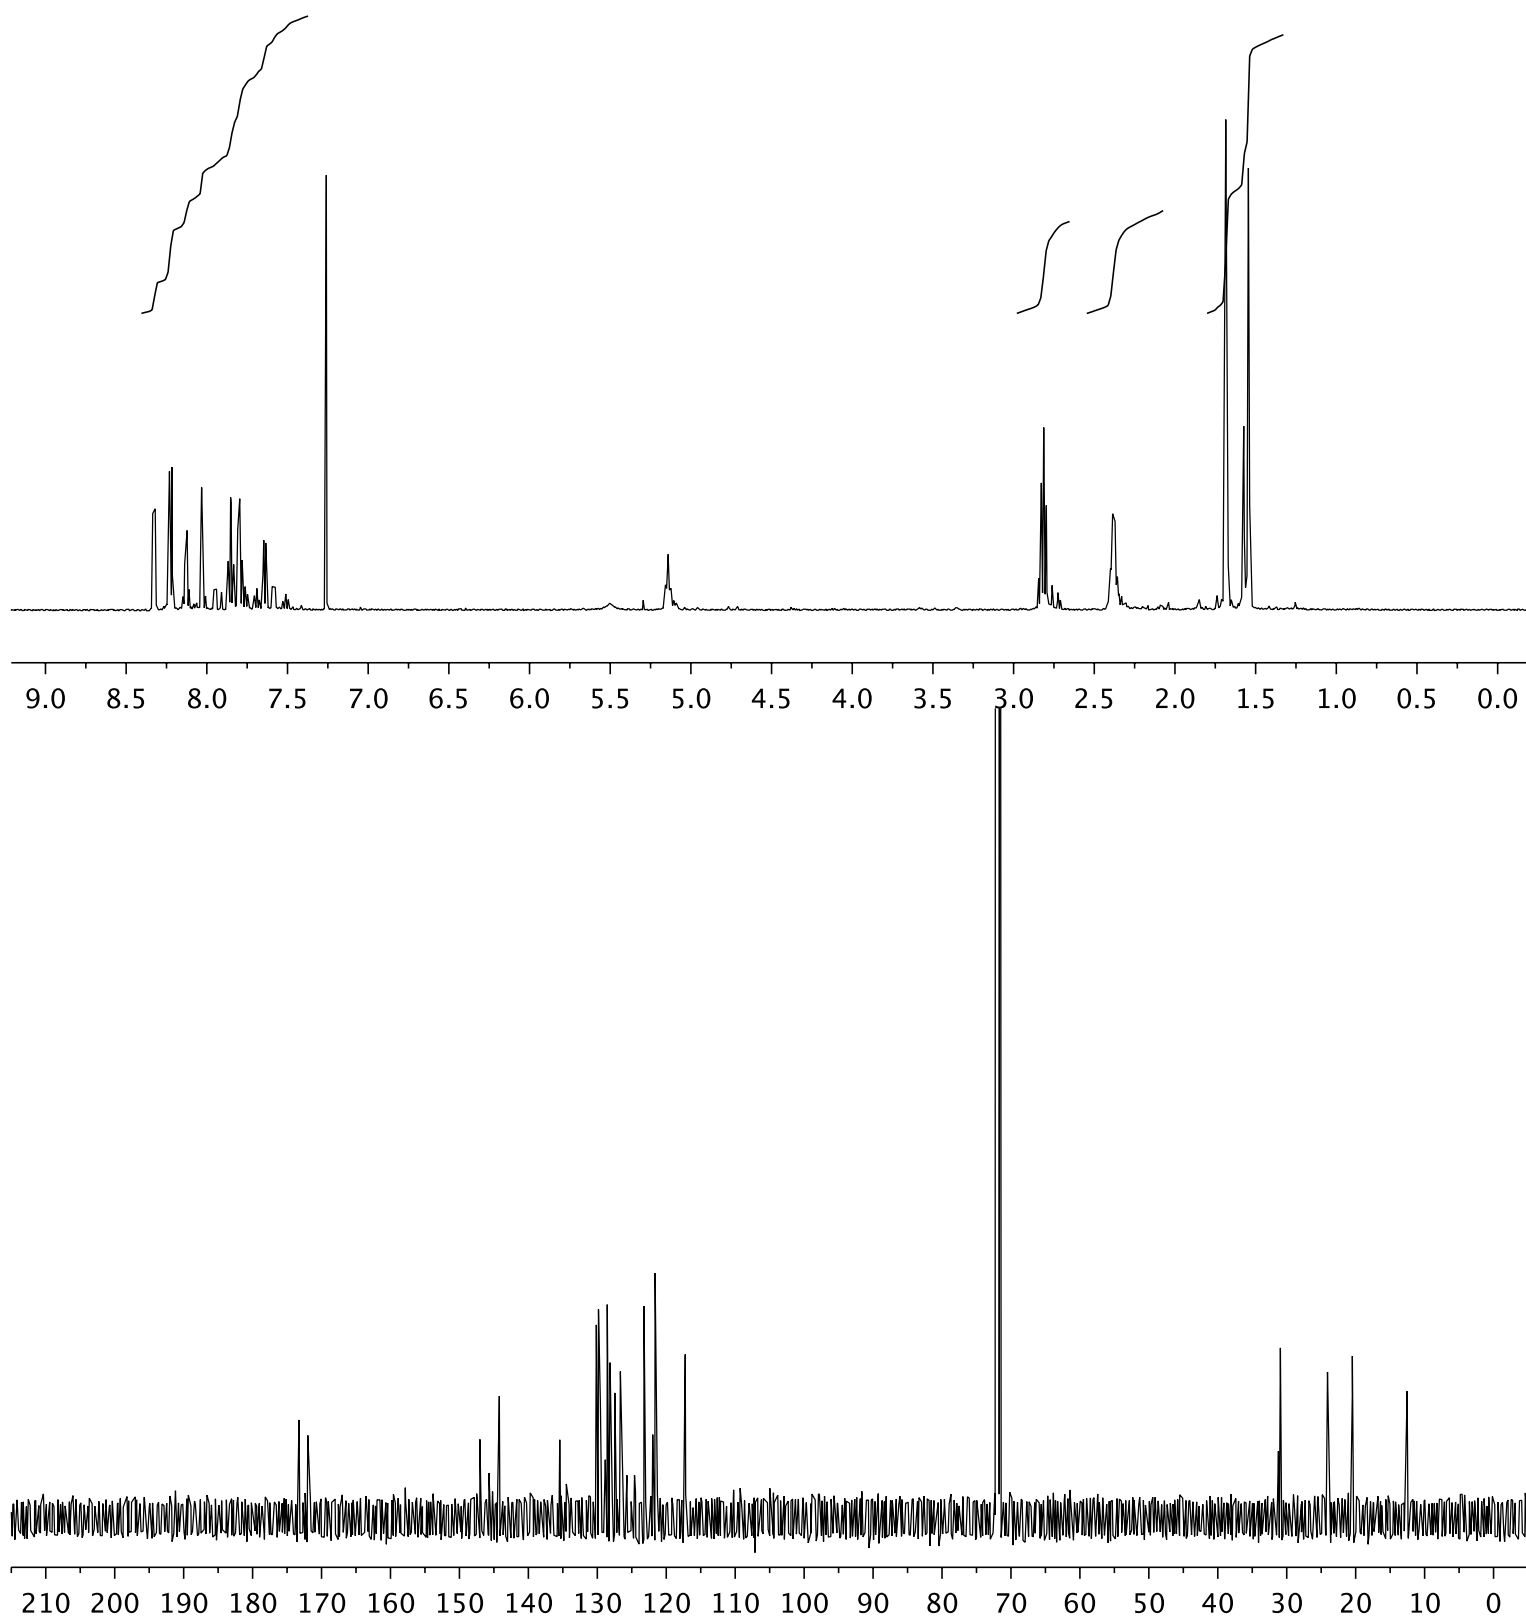

$^1\text{H}$ -NMR (500 MHz) and  $^{13}\text{C}$ -NMR (125 MHz) spectra of diol **10** in  $\text{CDCl}_3$

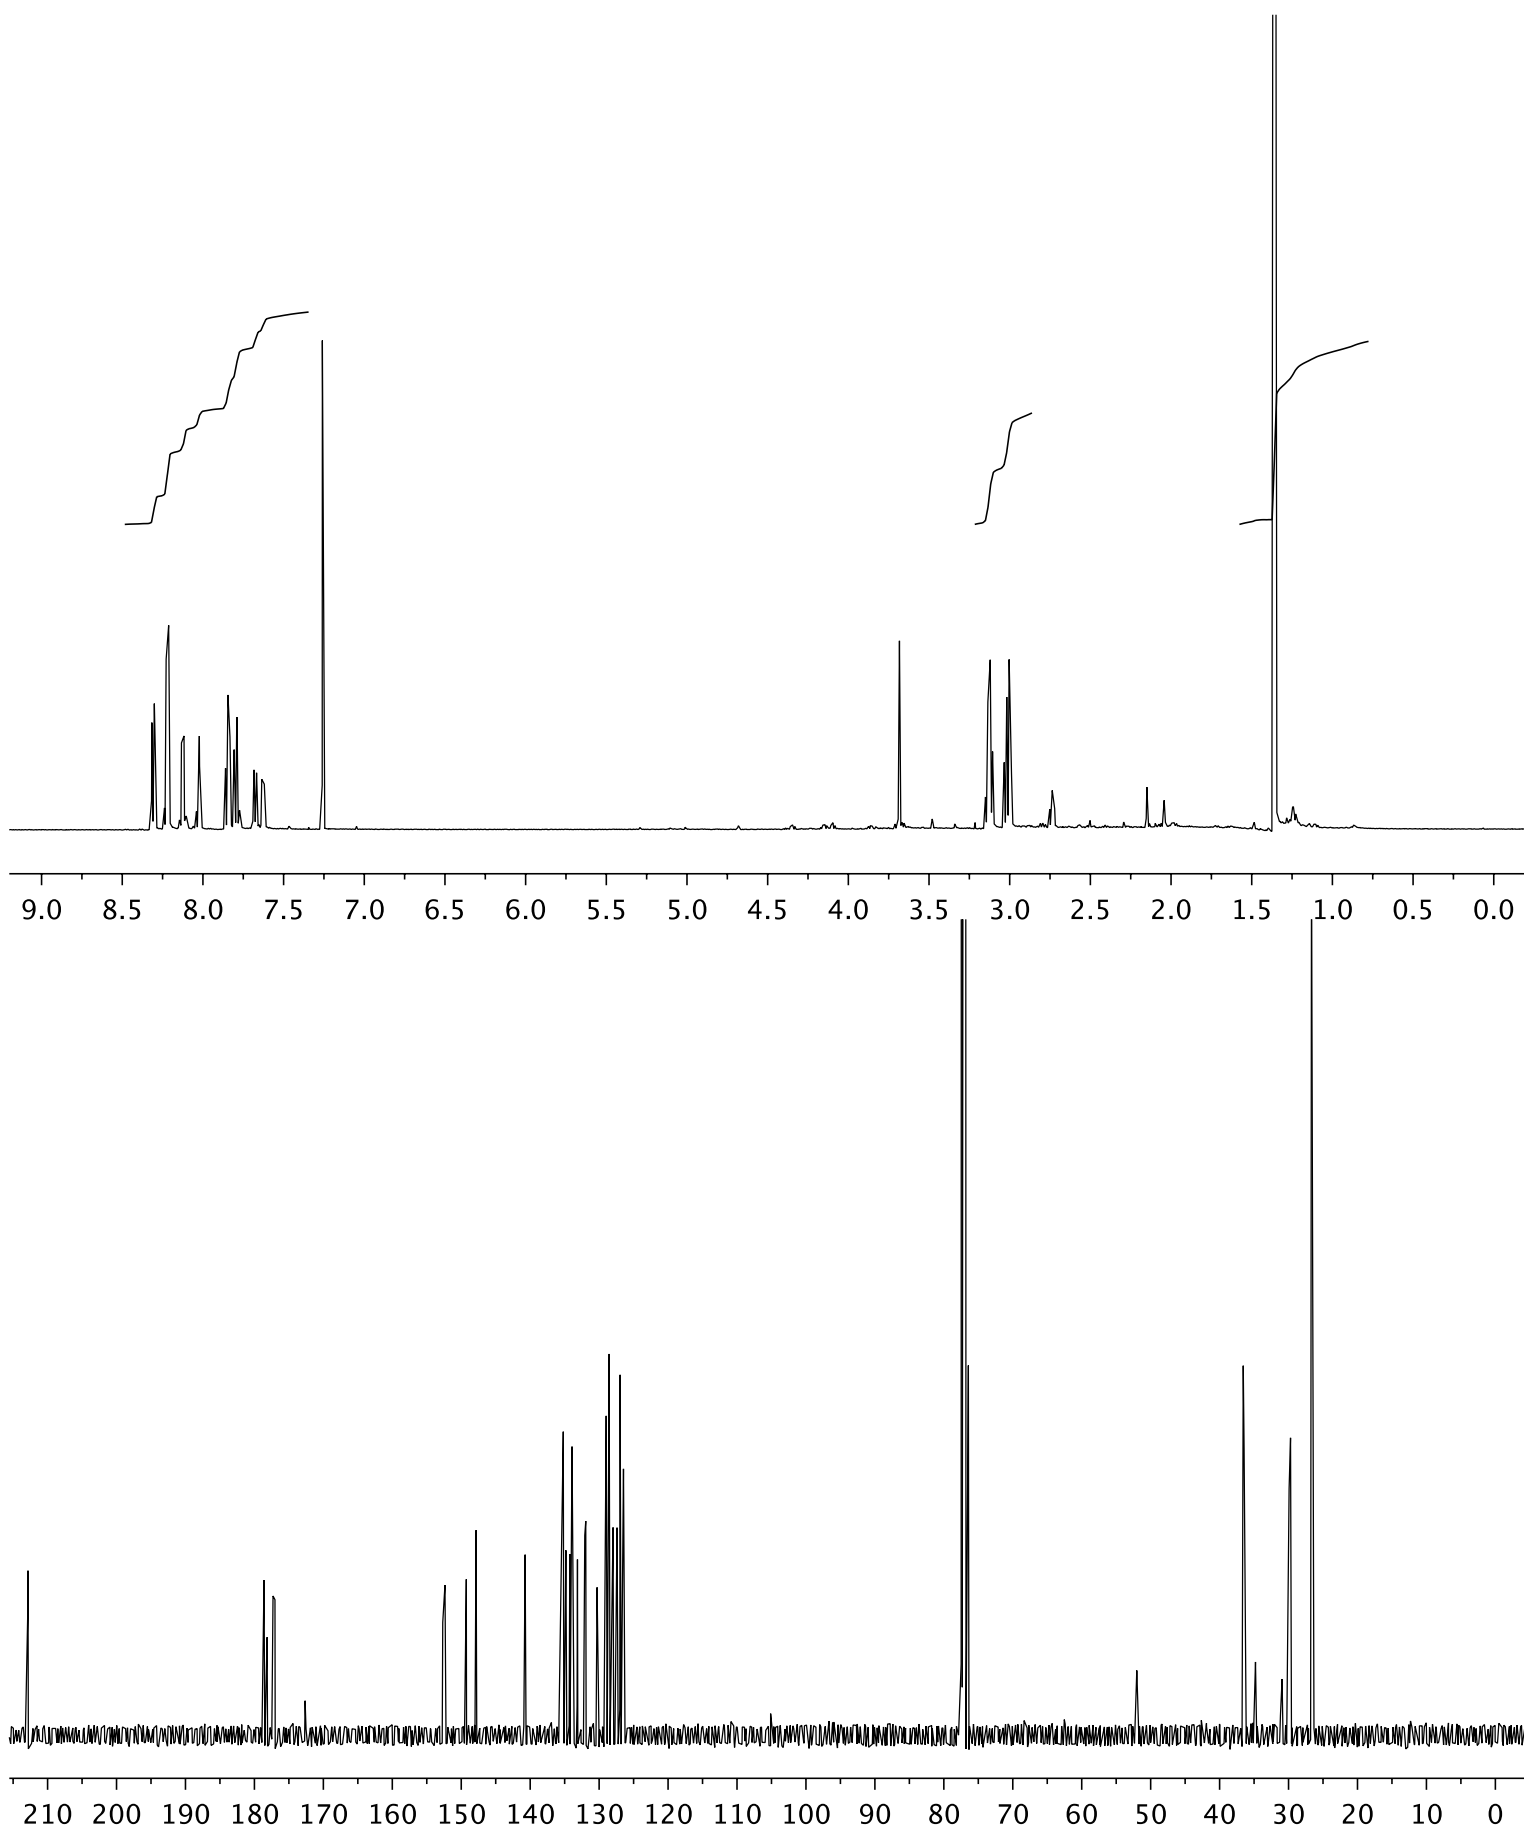

$^1\text{H}$ -NMR (500 MHz) and  $^{13}\text{C}$ -NMR (125 MHz) spectra of aldehyde **11** in  $\text{CDCl}_3$

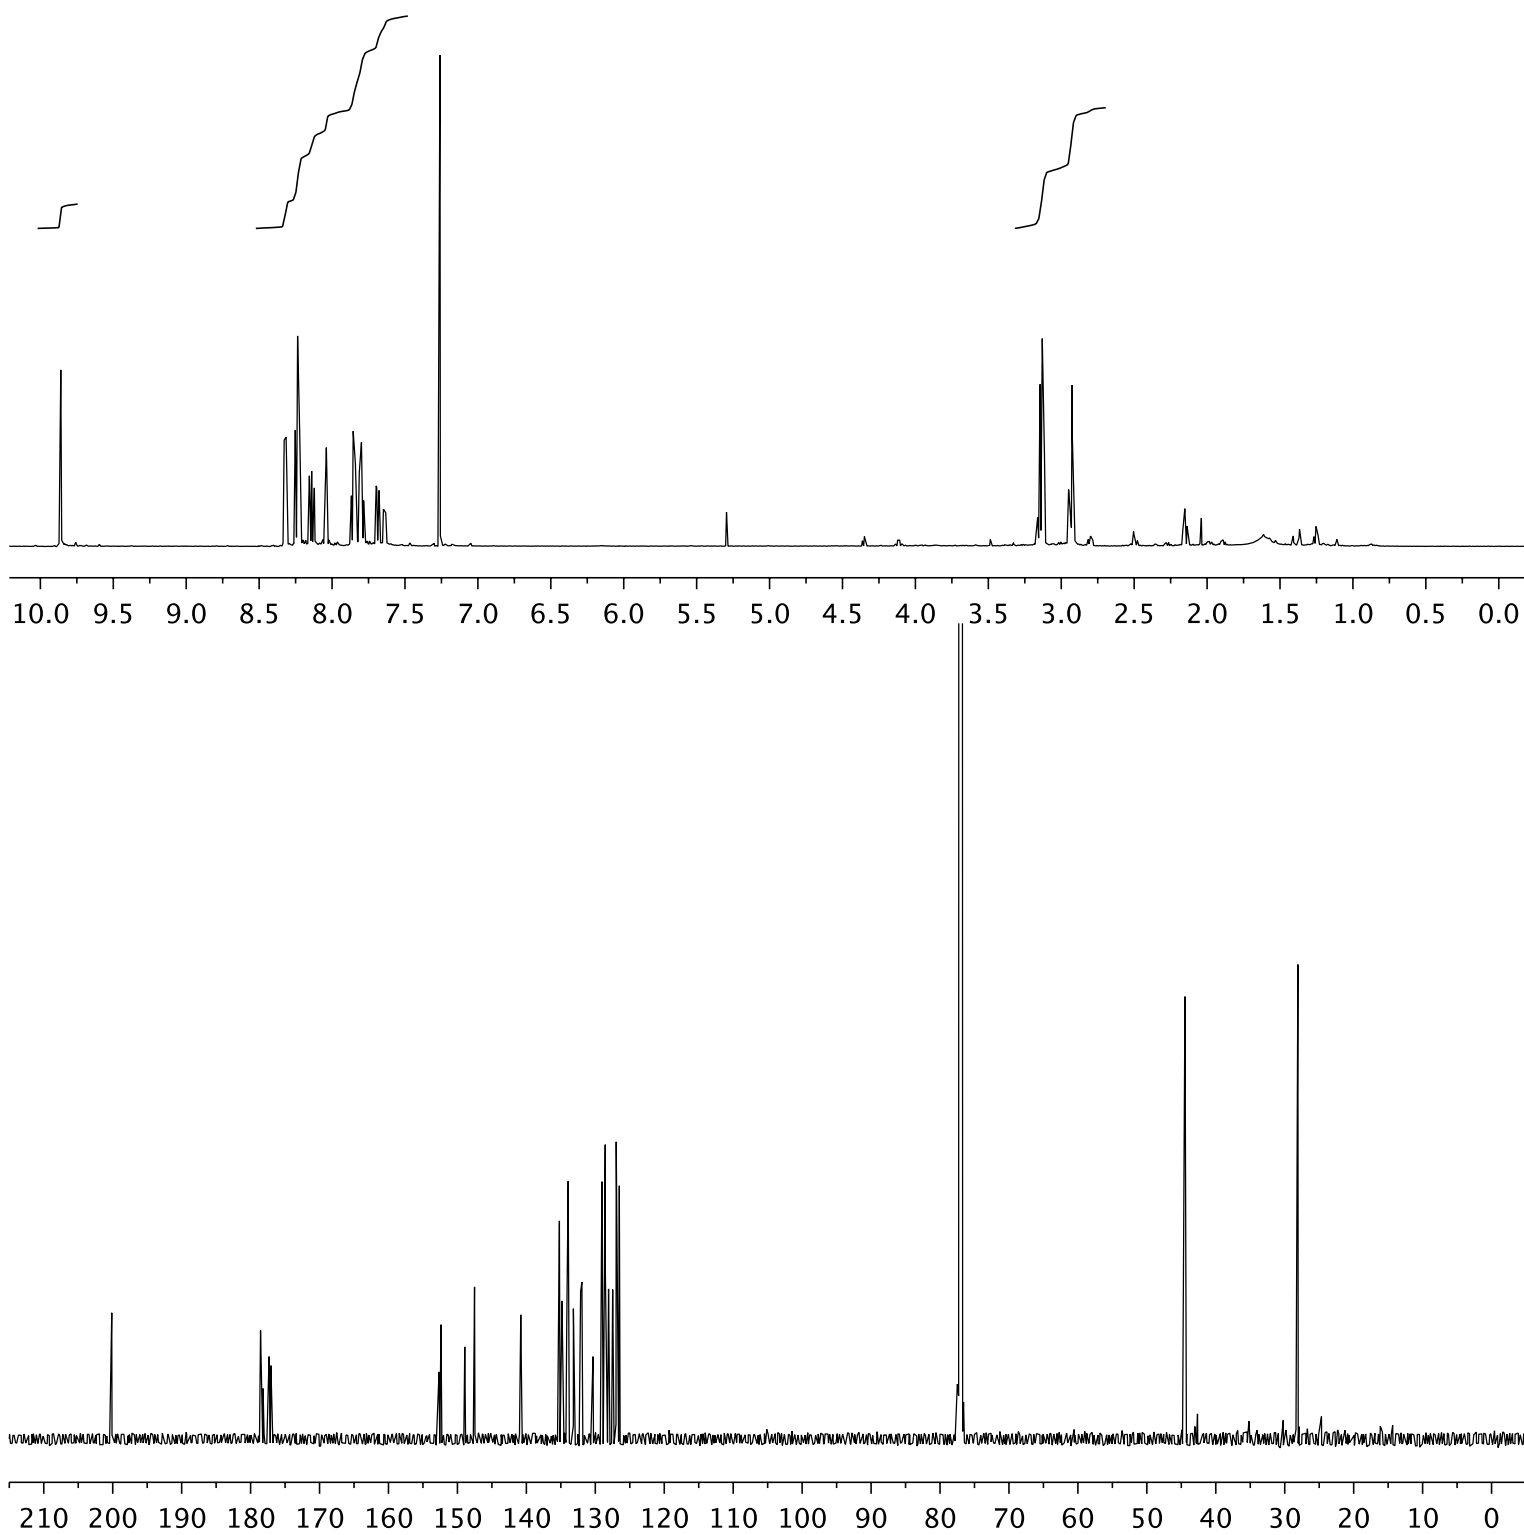



$^1\text{H}$ -NMR (500 MHz) and  $^{13}\text{C}$ -NMR (125 MHz) spectra of acid **12** in  $\text{DMSO-d}_6$

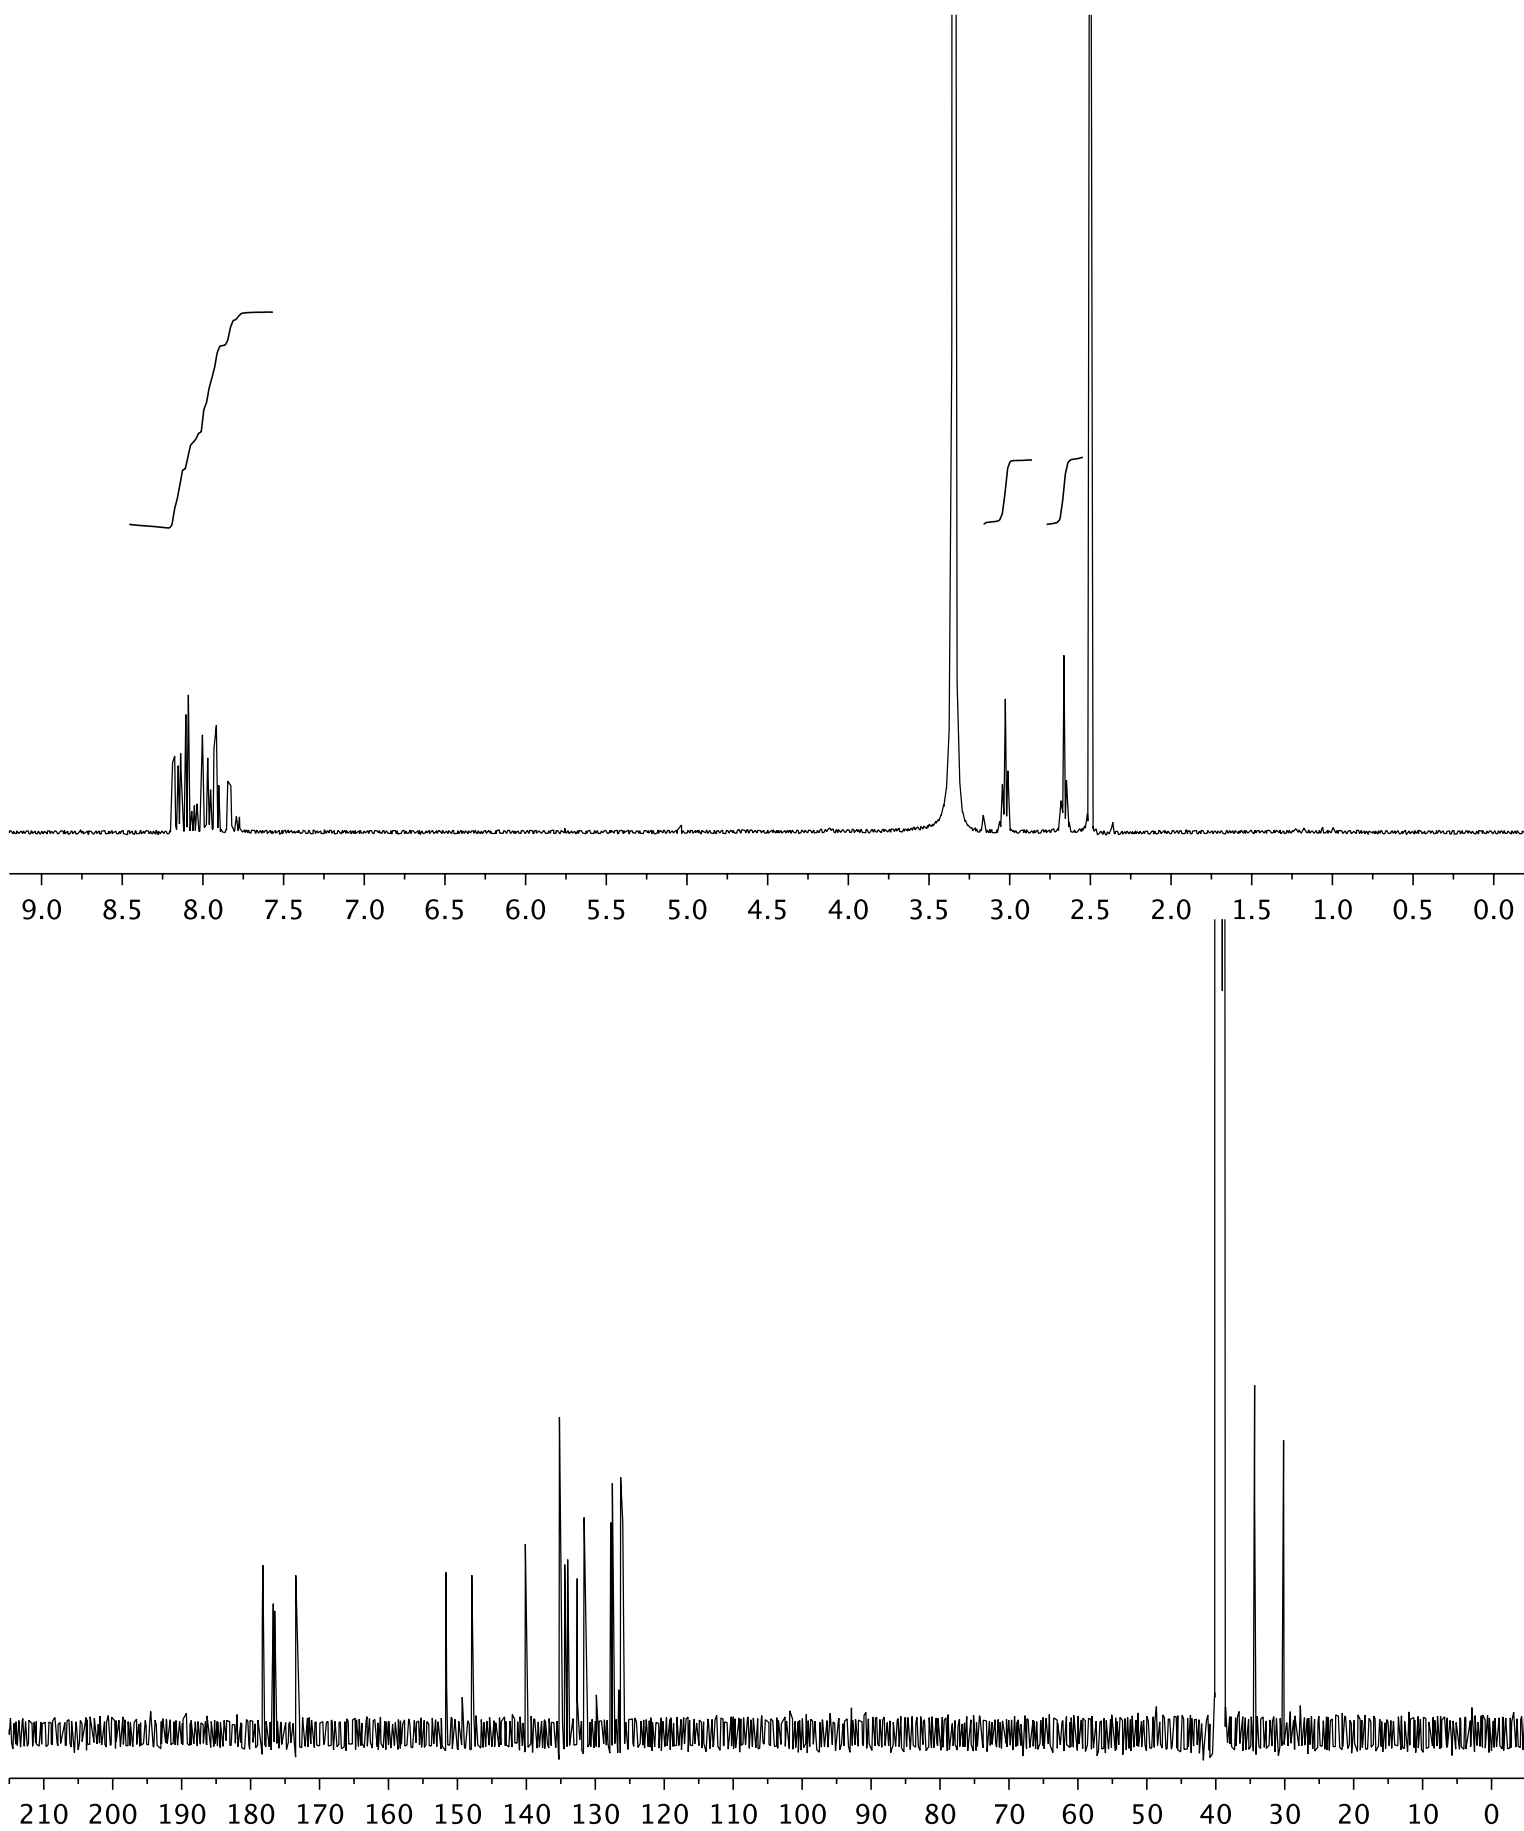

$^1\text{H-NMR}$  (500 MHz) and  $^{13}\text{C-NMR}$  (125 MHz) spectra of tetraacetateacid **13** in  $\text{CDCl}_3$

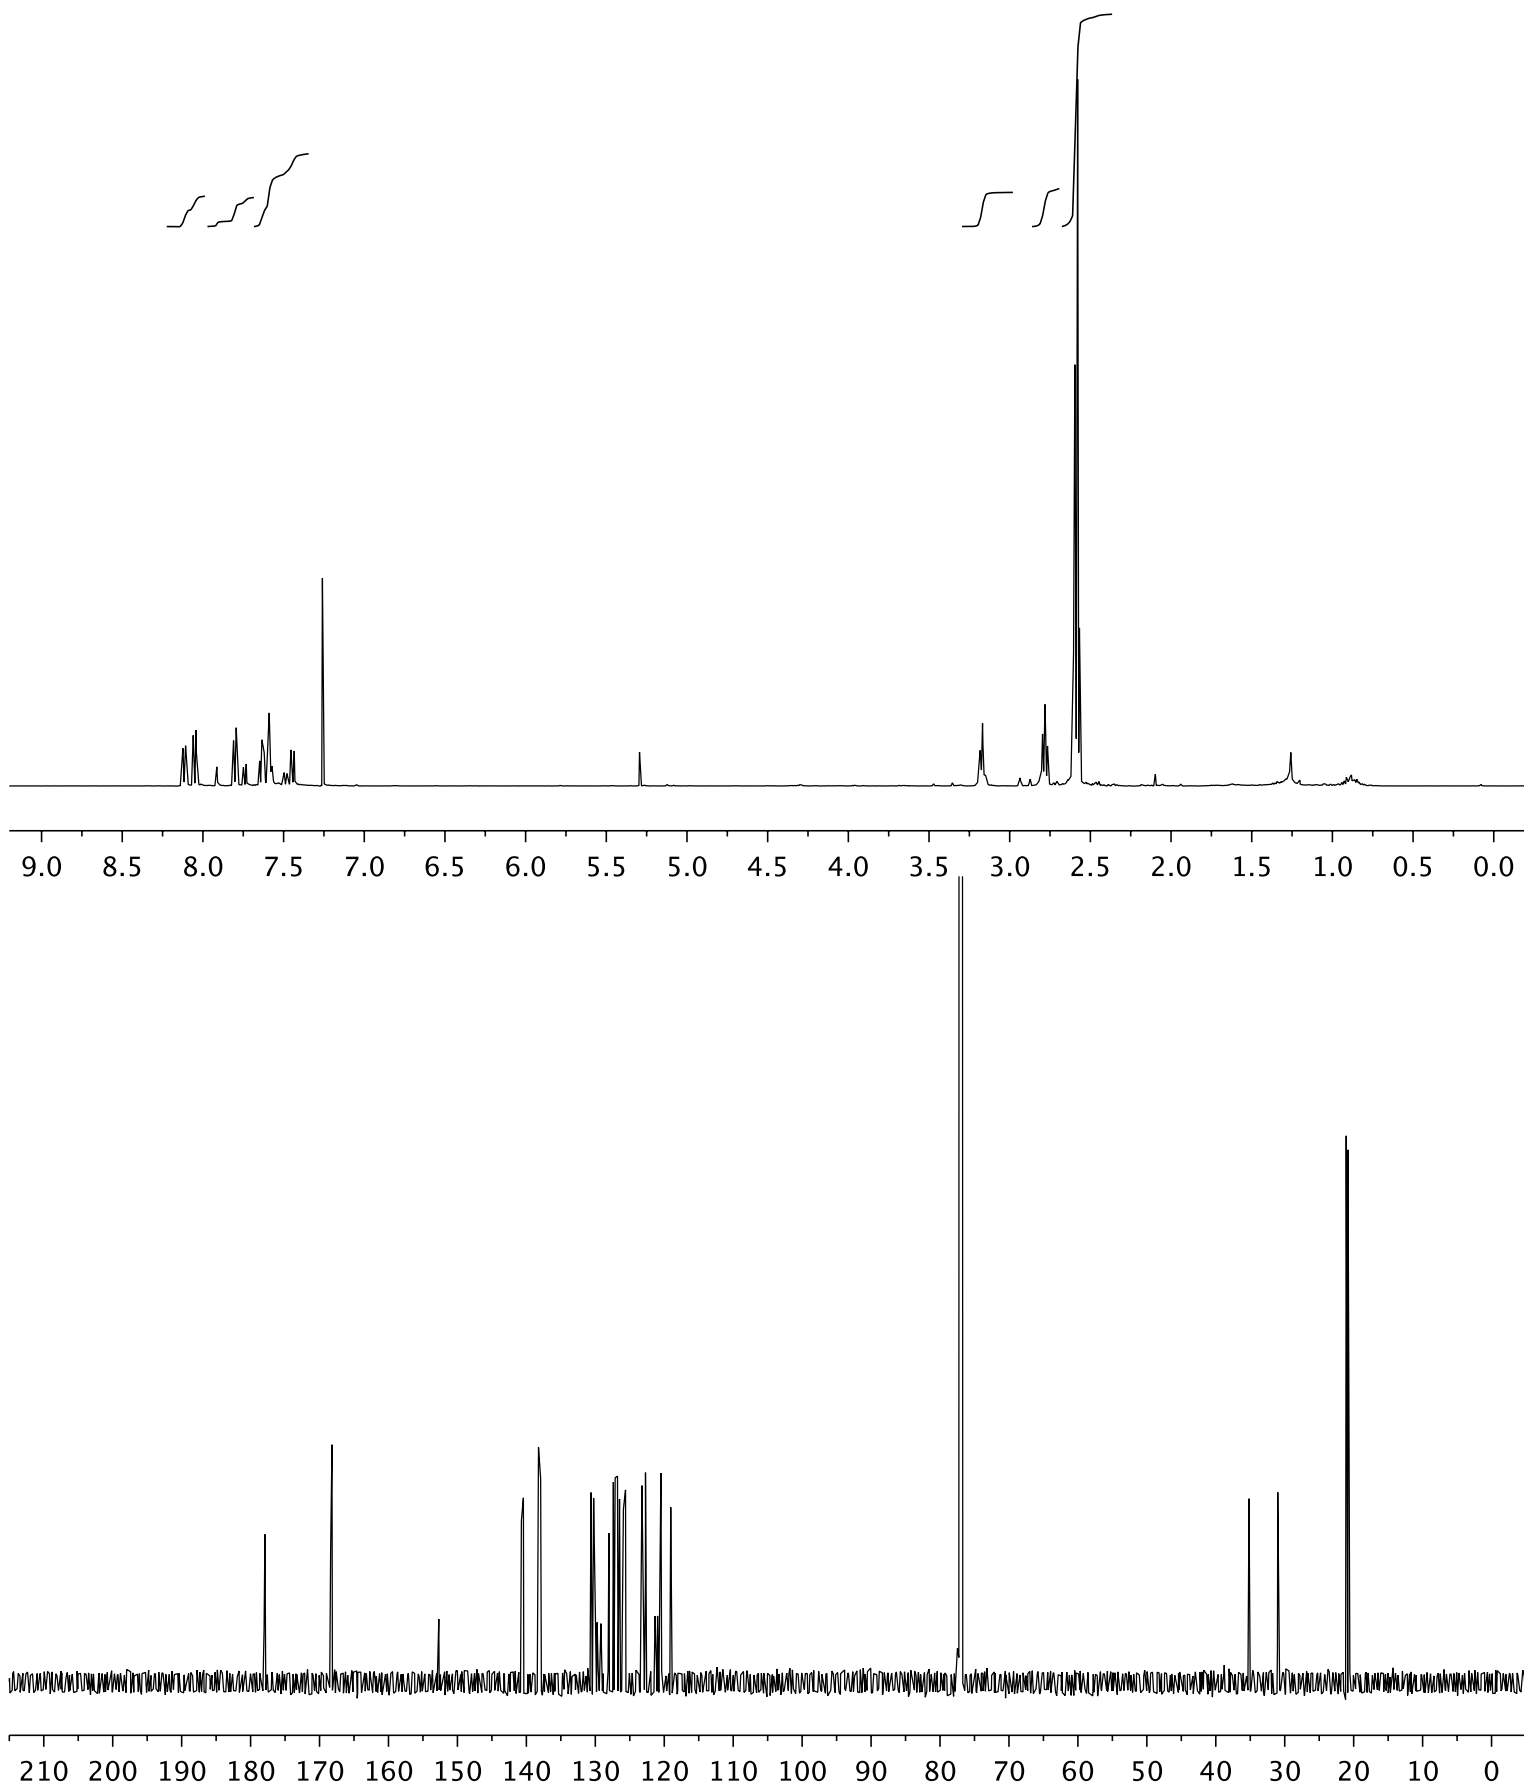

$^1\text{H-NMR}$  (500 MHz) and  $^1\text{H-gCOSY}$  (500 MHz) spectra of probe **15** in  $\text{CD}_3\text{OD}$

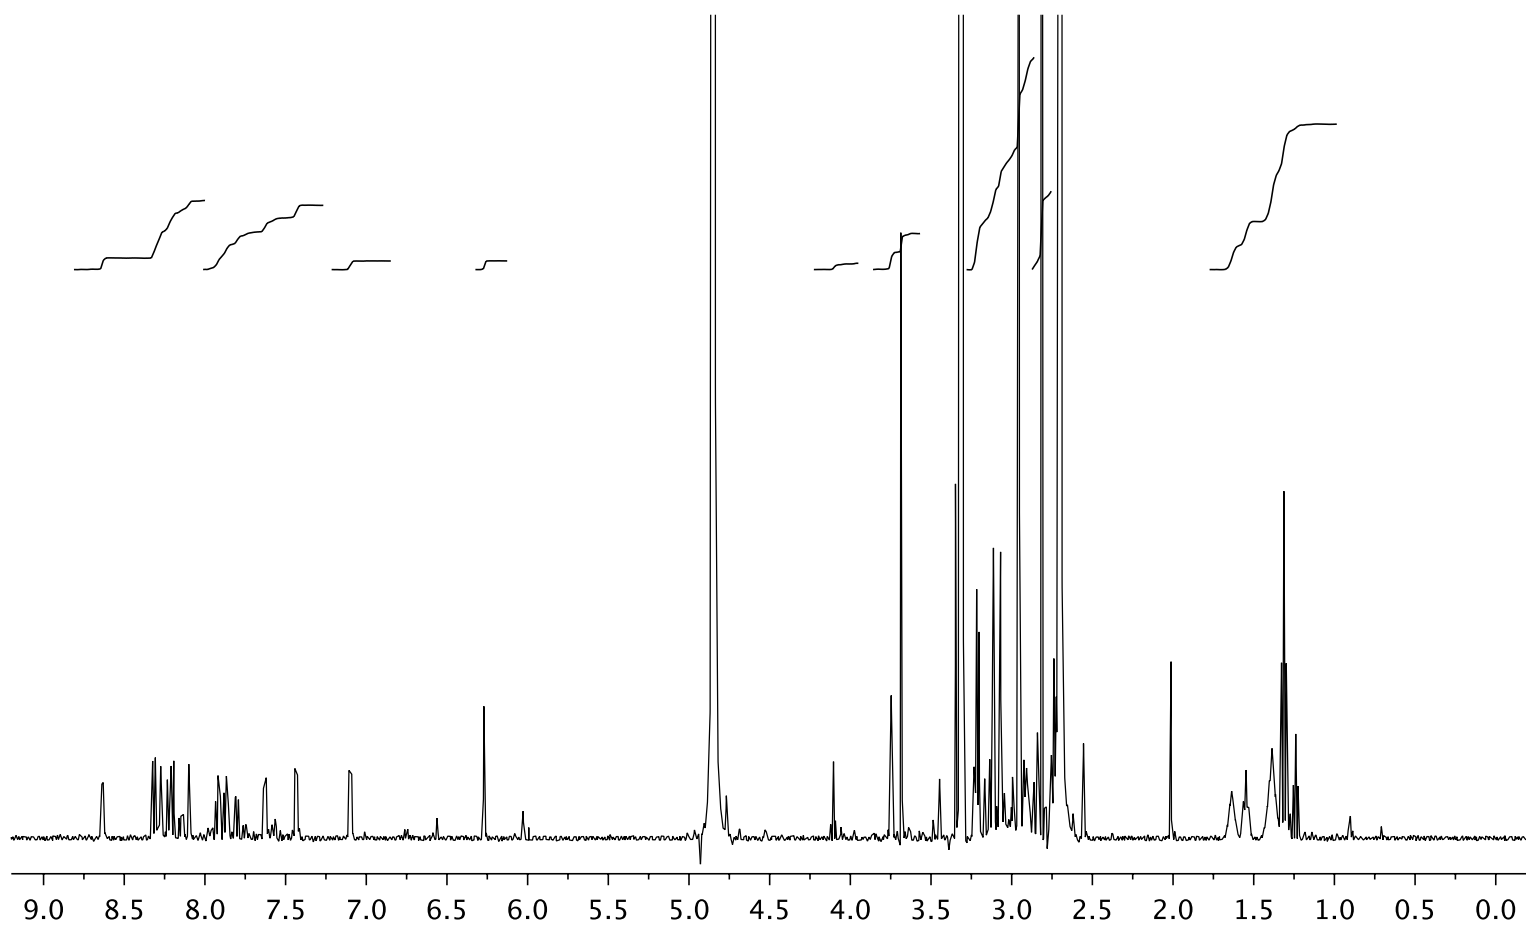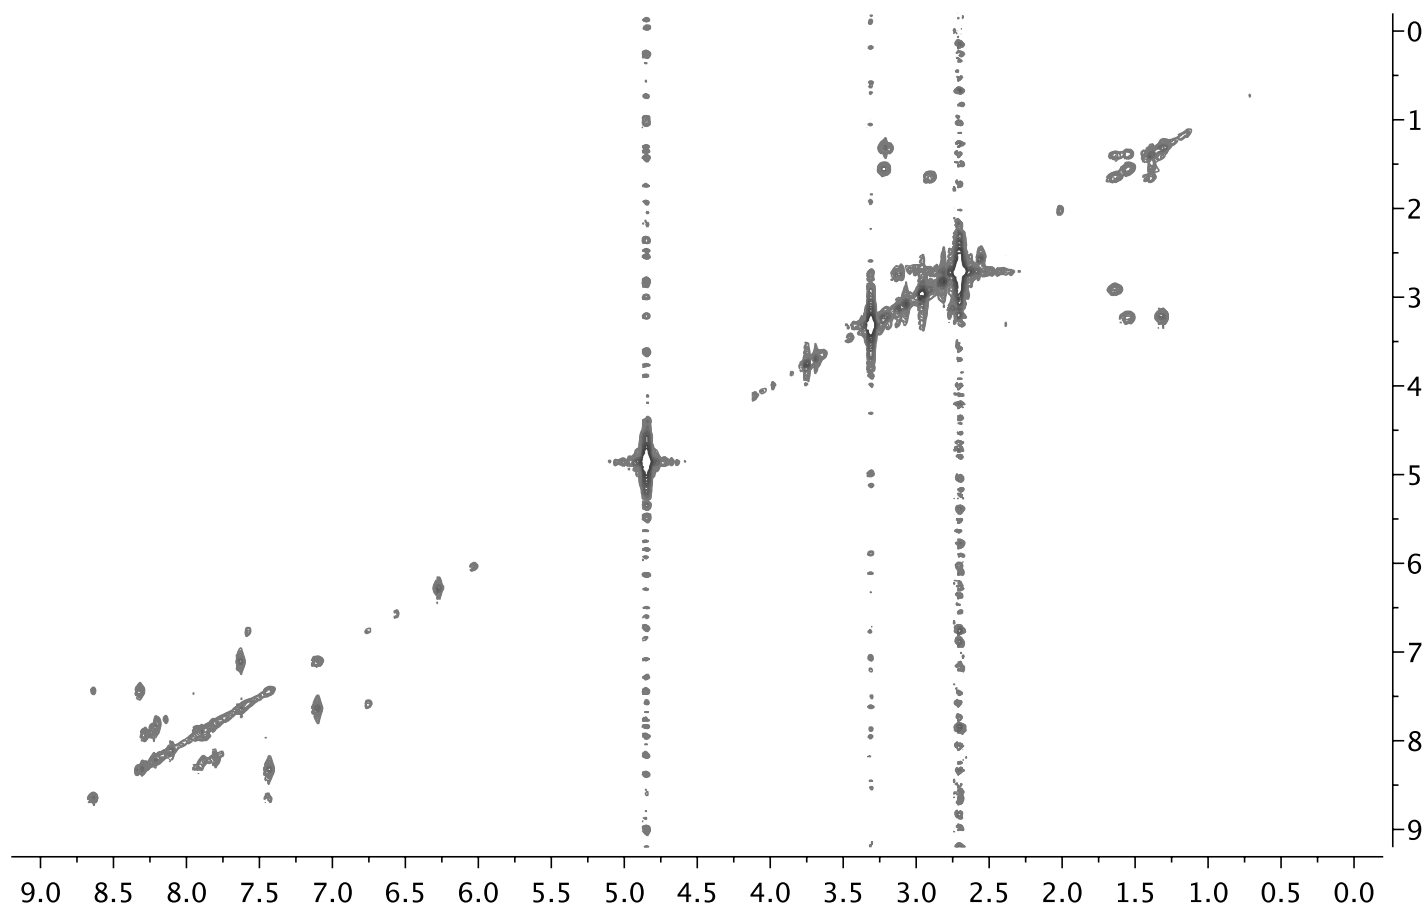

$^1\text{H}$ -NMR (500 MHz) and  $^{13}\text{C}$ -NMR (125 MHz) spectra of probe **16** in  $\text{CDCl}_3$

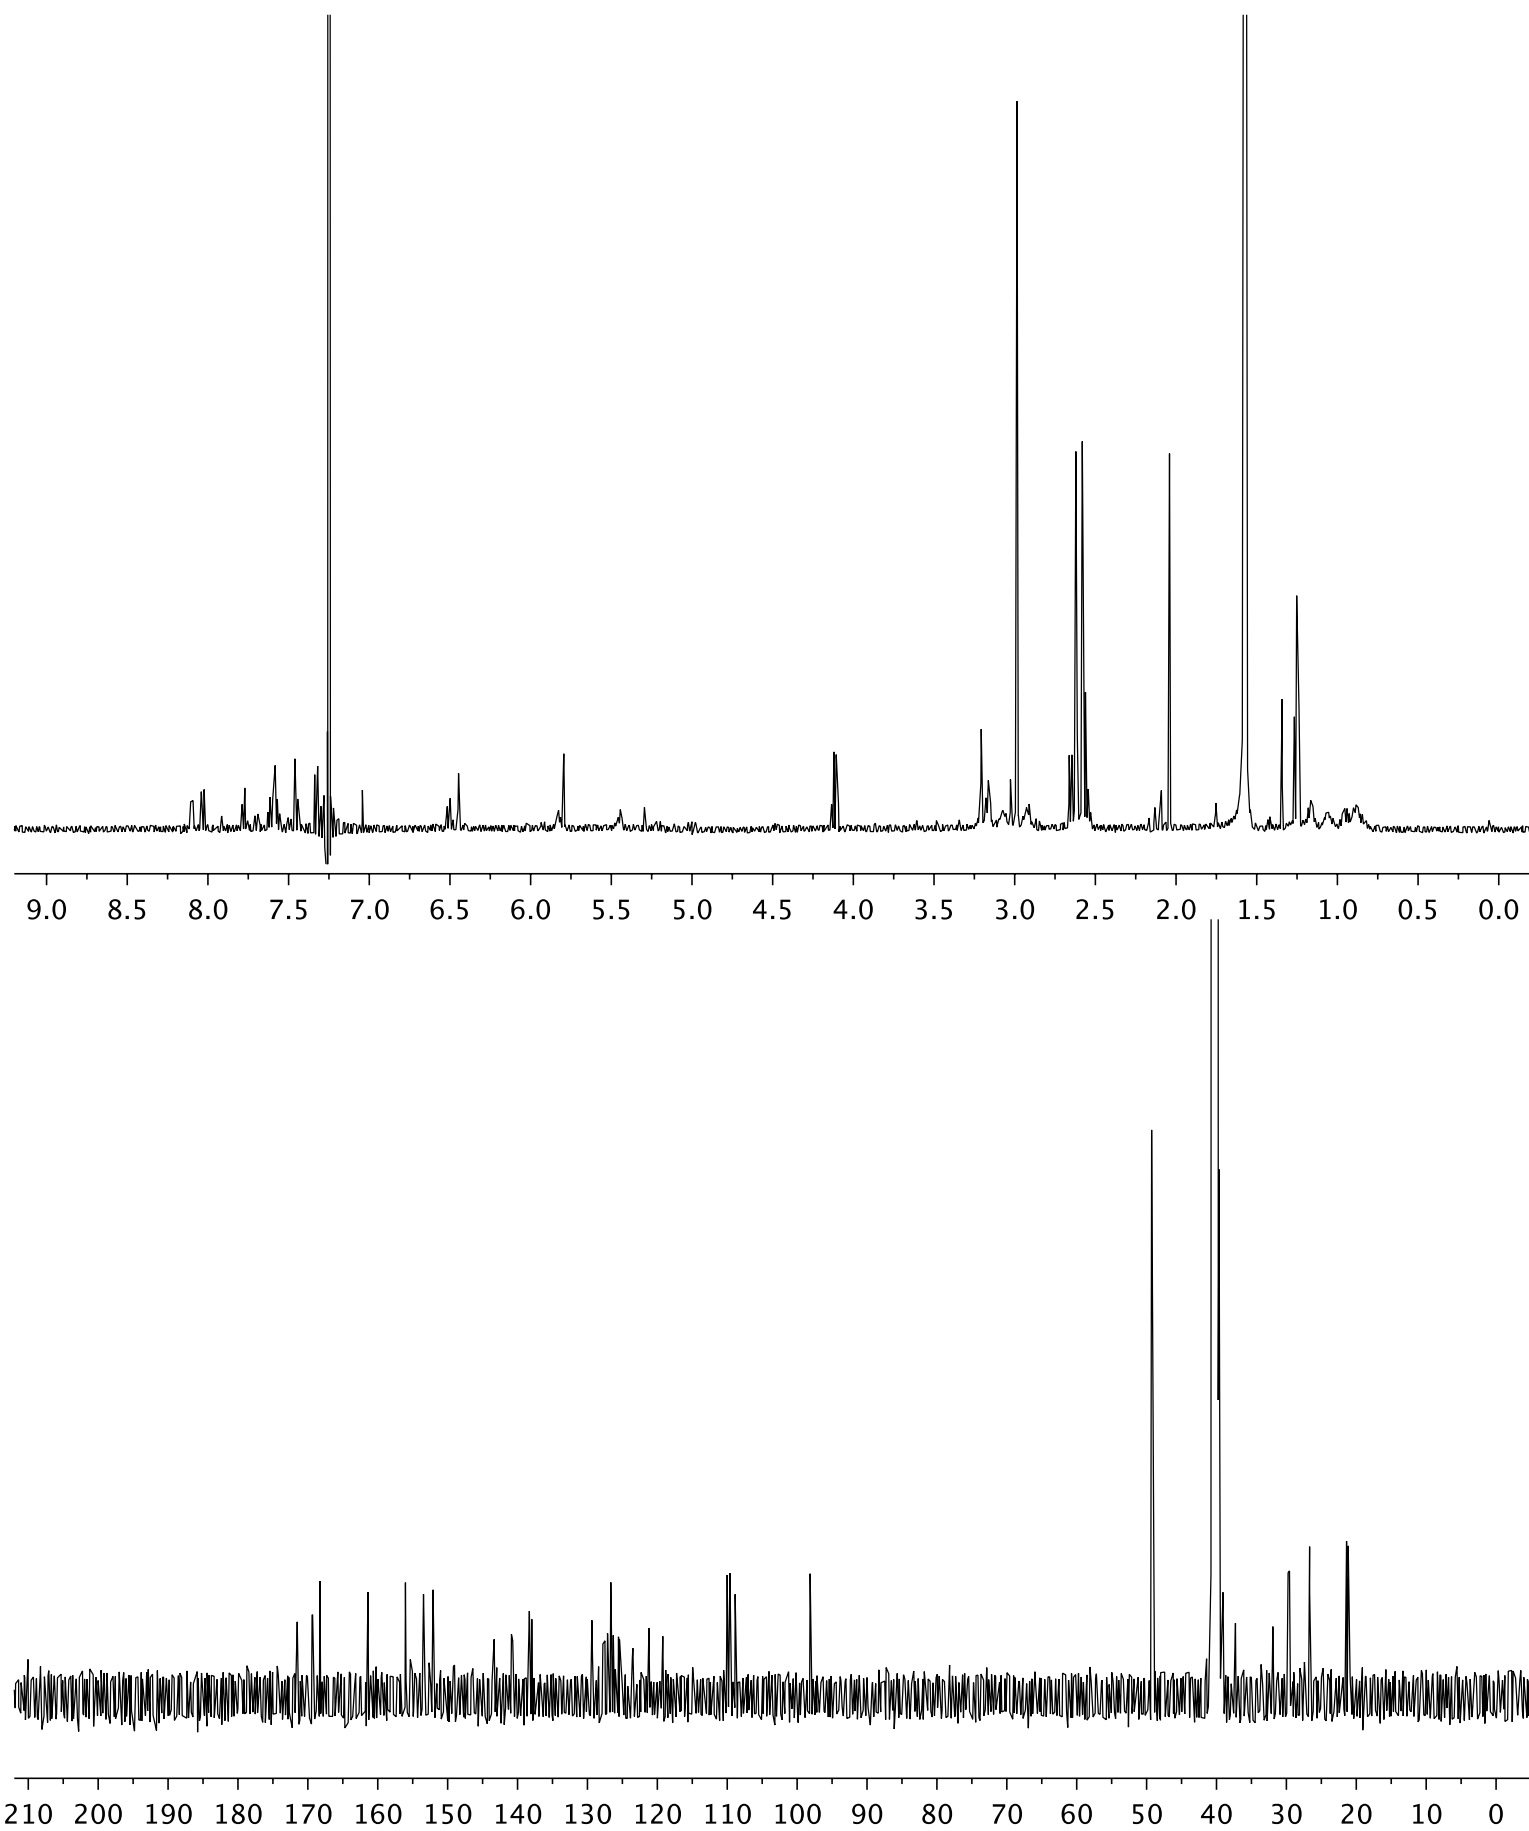

$^1\text{H}$ -NMR (500 MHz) and  $^{13}\text{C}$ -NMR (125 MHz) spectra of amide **17** in  $\text{DMSO-}d_6$

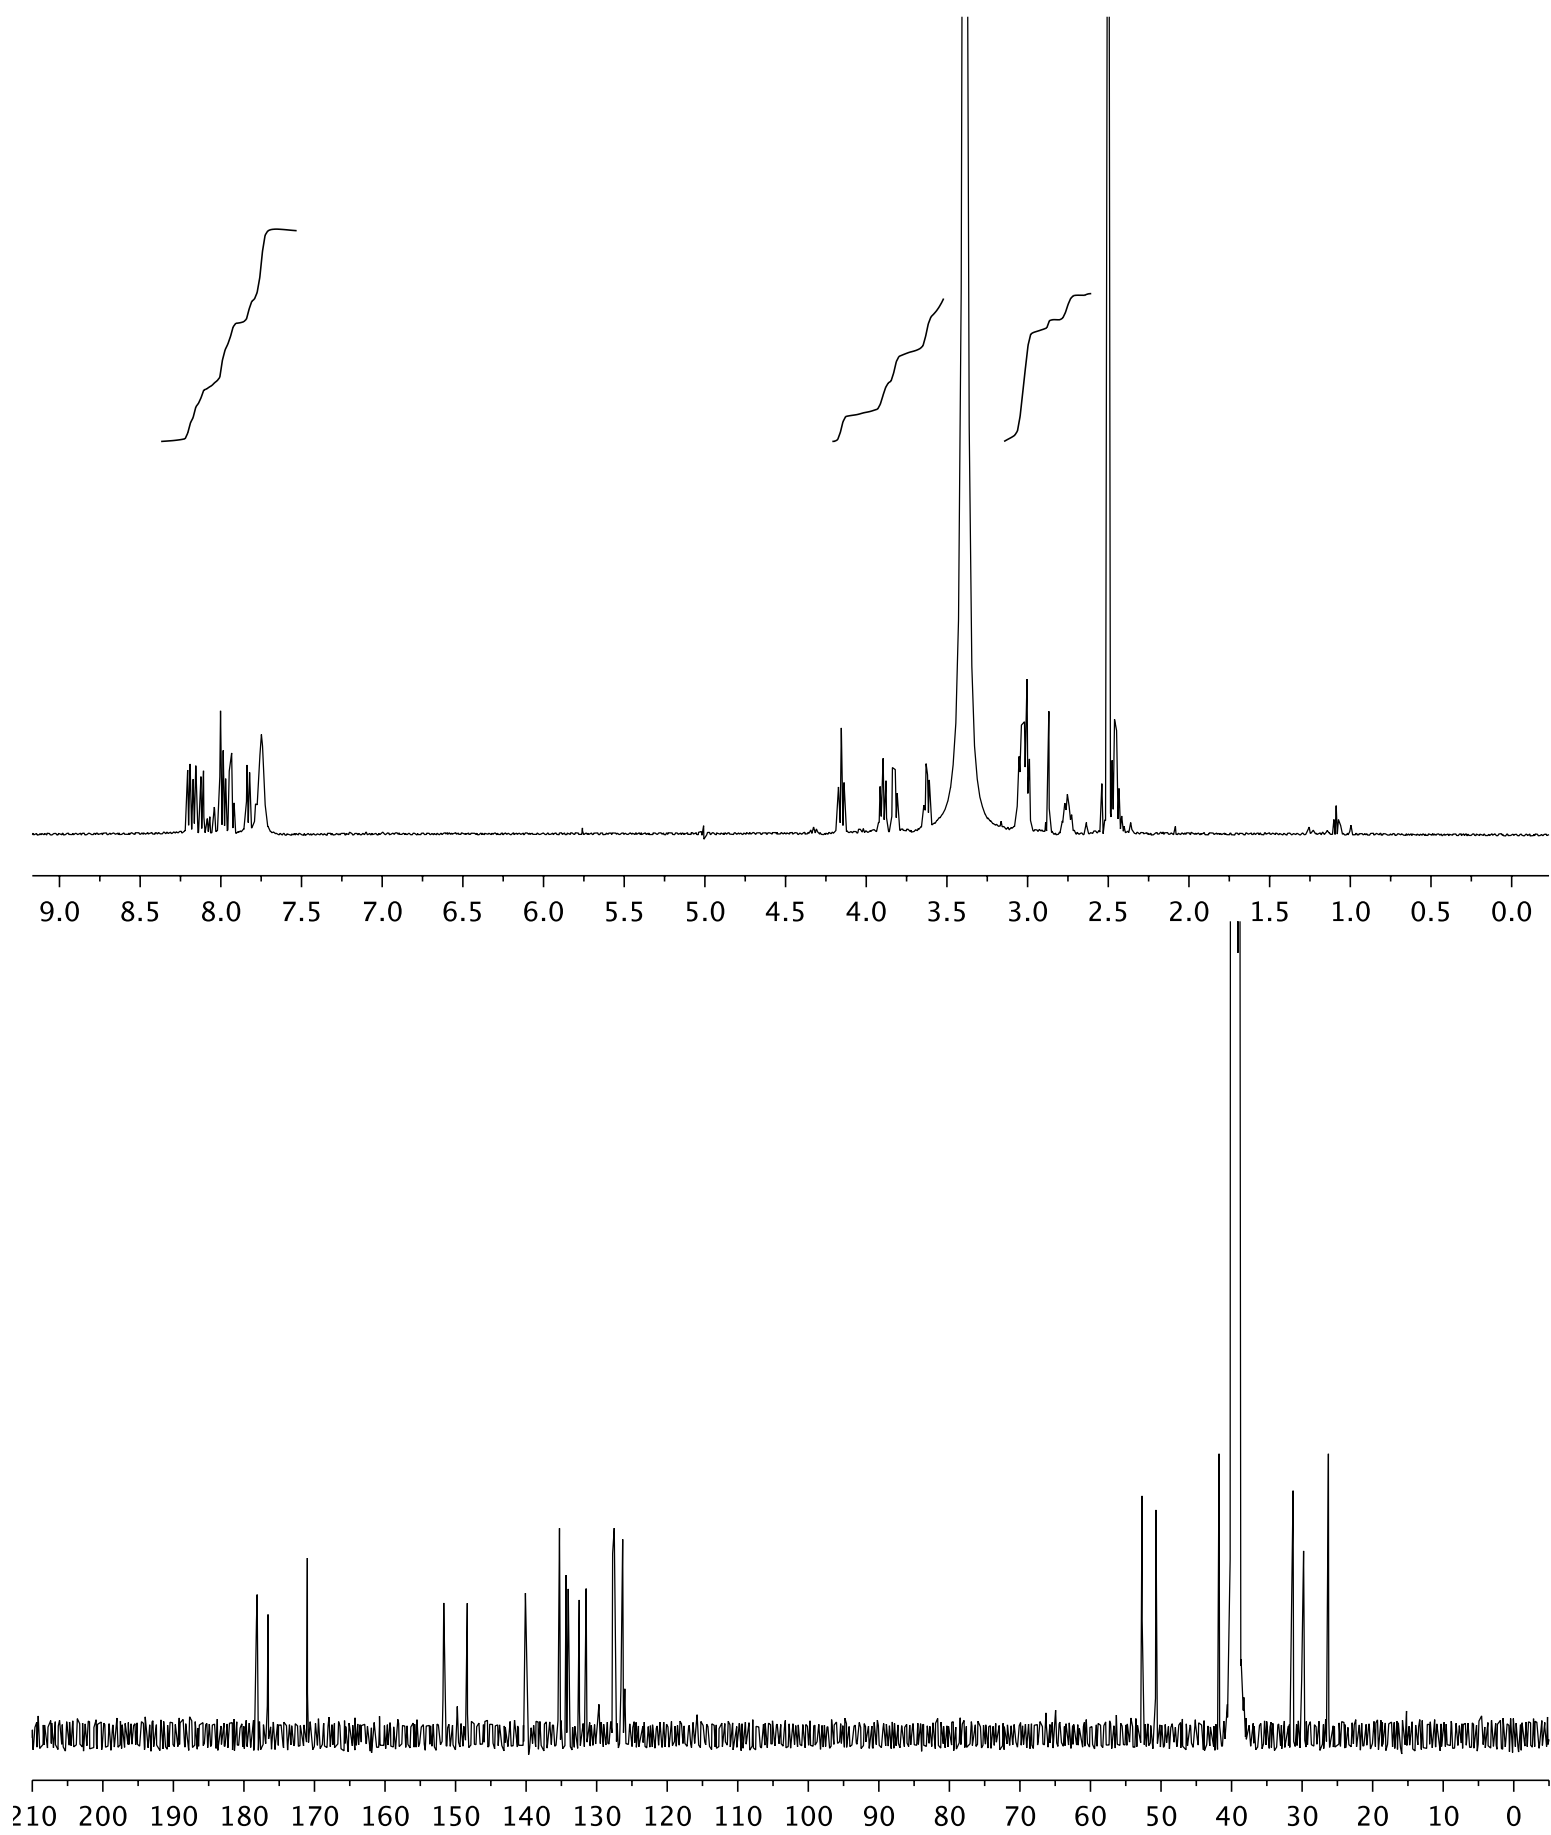

**Copies of selected NCI60 analyses.**

NCI code numbers are provided for data sets collected from compounds **1, 2, 10, 17, 18**.

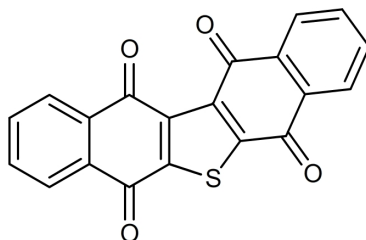

**1 S747855**

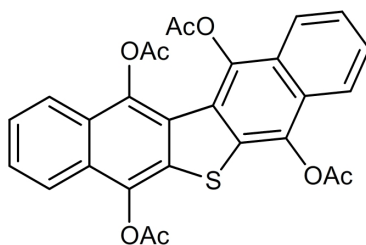

**2 S774837**

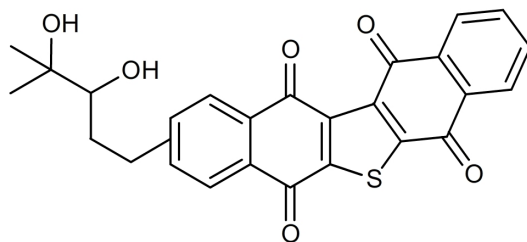

**10 D-778345**

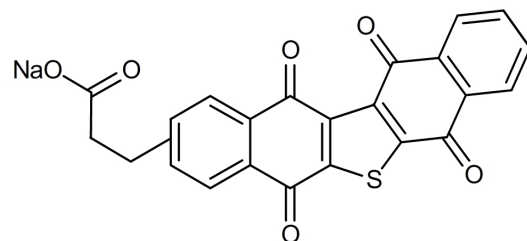

**17 S765862**

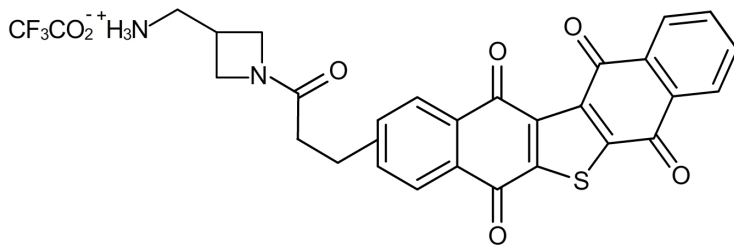

**18 S765863**

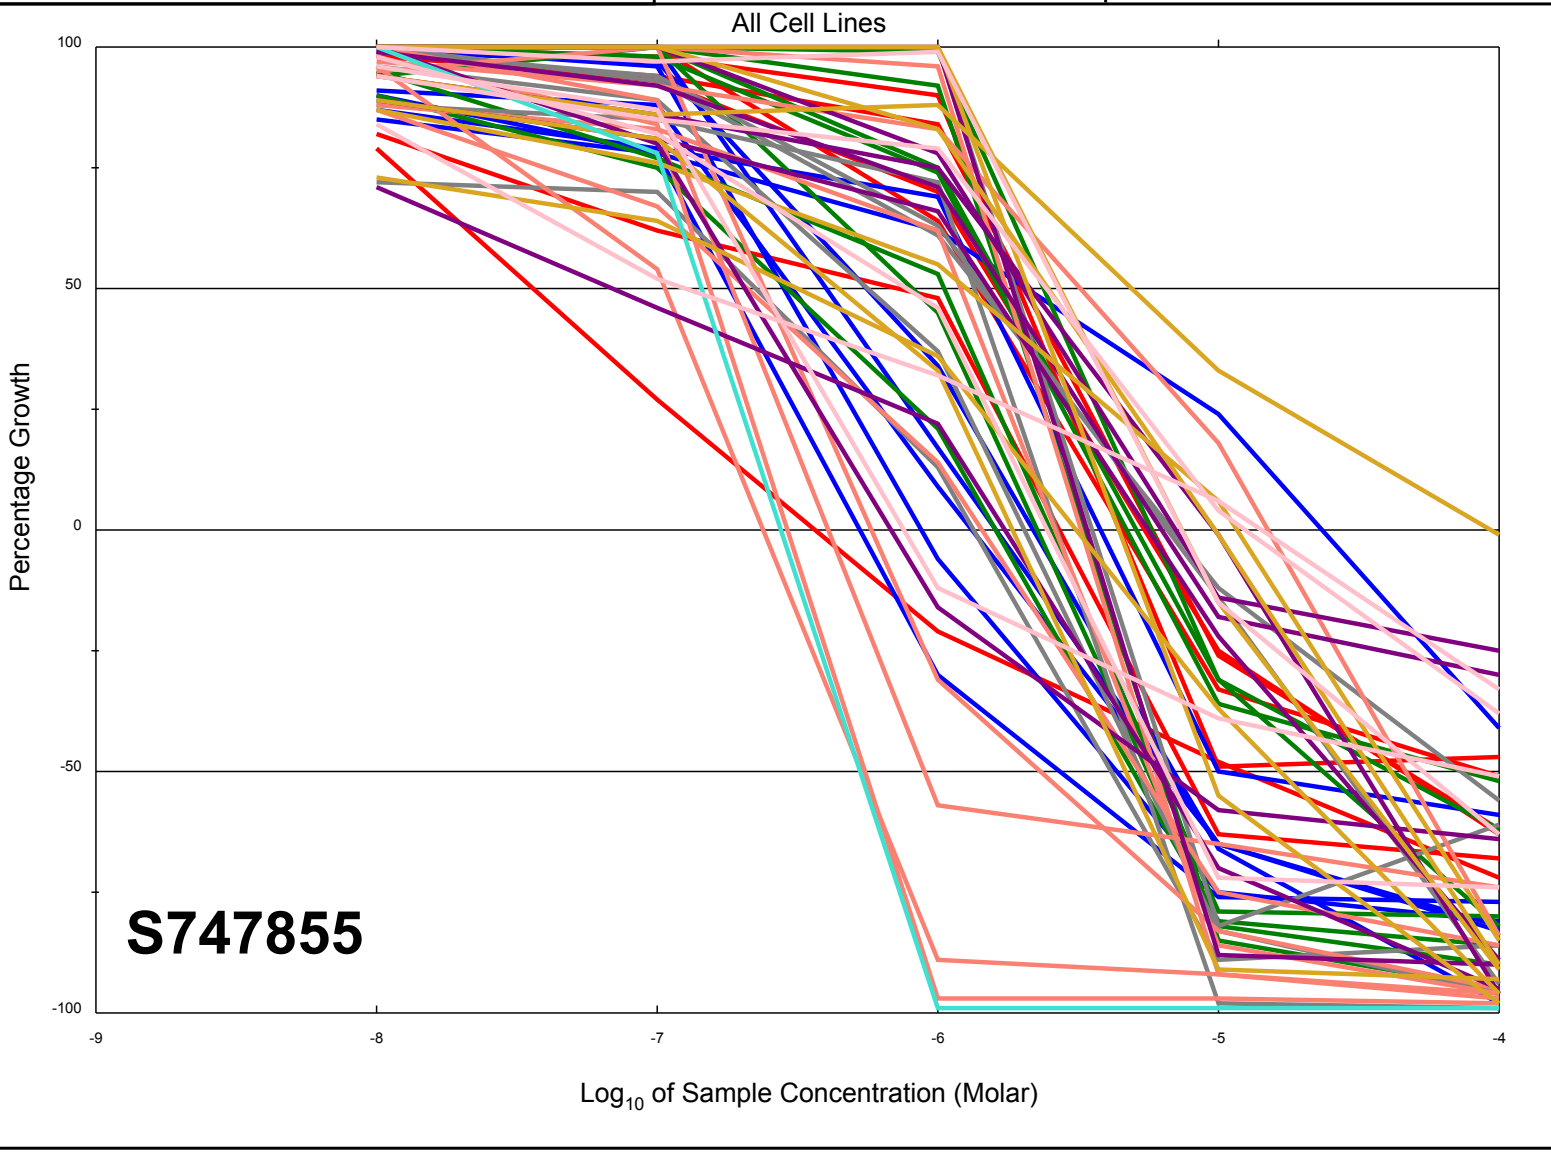

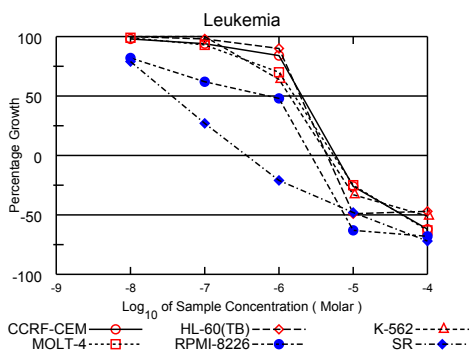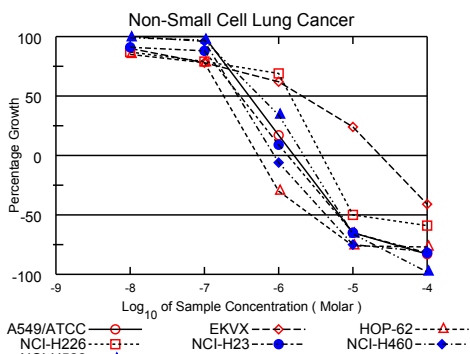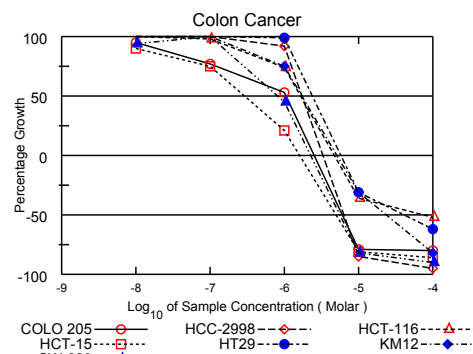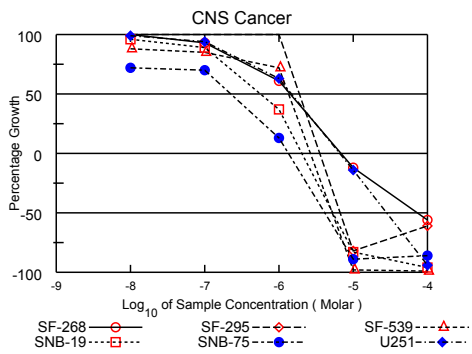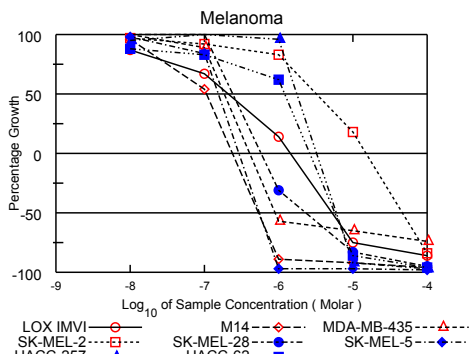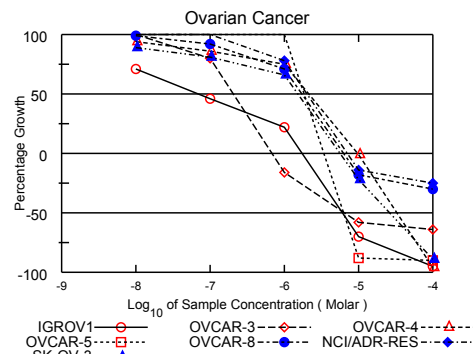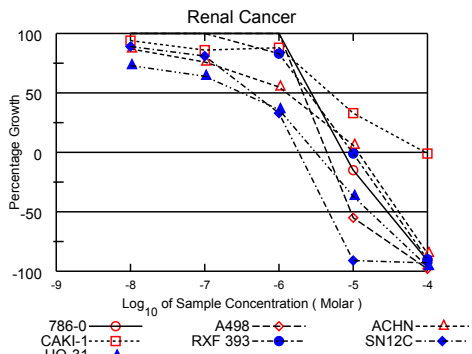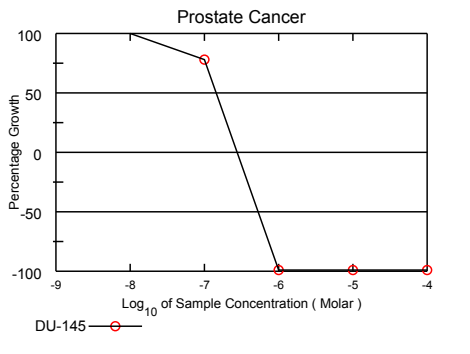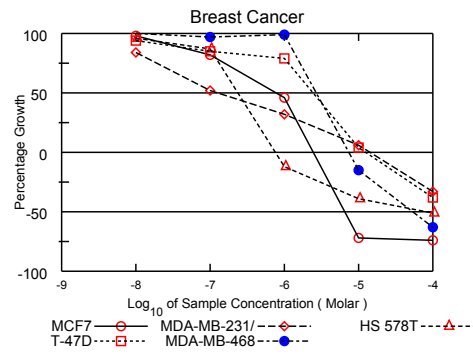



## National Cancer Institute Developmental Therapeutics Program In-Vitro Testing Results

|                                |                                       |                |               |
|--------------------------------|---------------------------------------|----------------|---------------|
| NSC : D - 747855 / 1           | Experiment ID : 0808NS89              | Test Type : 08 | Units : Molar |
| Report Date : January 23, 2014 | Test Date : August 11, 2008           | QNS :          | MC :          |
| COMI : CNJ927.344 (73141)      | Stain Reagent : SRB Dual-Pass Related | SSPL : 075T    |               |

| Panel/Cell Line                   | Log10 Concentration |       |                        |       |       |       |       |      |                |      |      |      |         |         |           |     |      |
|-----------------------------------|---------------------|-------|------------------------|-------|-------|-------|-------|------|----------------|------|------|------|---------|---------|-----------|-----|------|
|                                   | Time                |       | Mean Optical Densities |       |       |       |       |      | Percent Growth |      |      |      |         |         | GI50      | TGI | LC50 |
|                                   | Zero                | Ctrl  | -8.0                   | -7.0  | -6.0  | -5.0  | -4.0  | -8.0 | -7.0           | -6.0 | -5.0 | -4.0 |         |         |           |     |      |
| <b>Leukemia</b>                   |                     |       |                        |       |       |       |       |      |                |      |      |      |         |         |           |     |      |
| CCRF-CEM                          | 0.341               | 1.192 | 1.178                  | 1.139 | 1.053 | 0.252 | 0.130 | 98   | 94             | 84   | -26  | -62  | 2.03E-6 | 5.77E-6 | 4.61E-5   |     |      |
| HL-60(TB)                         | 0.908               | 2.546 | 2.546                  | 2.521 | 2.376 | 0.467 | 0.480 | 100  | 98             | 90   | -49  | -47  | 1.93E-6 | 4.45E-6 | > 1.00E-4 |     |      |
| K-562                             | 0.330               | 1.904 | 1.940                  | 1.904 | 1.333 | 0.220 | 0.161 | 102  | 100            | 64   | -33  | -51  | 1.38E-6 | 4.52E-6 | 8.39E-5   |     |      |
| MOLT-4                            | 0.615               | 1.972 | 1.964                  | 1.873 | 1.562 | 0.462 | 0.225 | 99   | 93             | 70   | -25  | -63  | 1.62E-6 | 5.45E-6 | 4.46E-5   |     |      |
| RPMI-8226                         | 0.553               | 1.335 | 1.197                  | 1.041 | 0.928 | 0.206 | 0.177 | 82   | 62             | 48   | -63  | -68  | 7.22E-7 | 2.71E-6 | 7.67E-6   |     |      |
| SR                                | 0.528               | 0.779 | 0.726                  | 0.597 | 0.418 | 0.275 | 0.147 | 79   | 27             | -21  | -48  | -72  | 3.62E-8 | 3.69E-7 | 1.22E-5   |     |      |
| <b>Non-Small Cell Lung Cancer</b> |                     |       |                        |       |       |       |       |      |                |      |      |      |         |         |           |     |      |
| A549/ATCC                         | 0.190               | 0.916 | 0.925                  | 0.971 | 0.311 | 0.066 | 0.032 | 101  | 108            | 17   | -65  | -83  | 4.29E-7 | 1.60E-6 | 6.51E-6   |     |      |
| EKVX                              | 1.107               | 2.497 | 2.362                  | 2.189 | 1.972 | 1.435 | 0.655 | 90   | 78             | 62   | 24   | -41  | 2.07E-6 | 2.32E-5 | > 1.00E-4 |     |      |
| HOP-62                            | 0.757               | 1.484 | 1.375                  | 1.328 | 0.529 | 0.180 | 0.176 | 85   | 78             | -30  | -76  | -77  | 1.83E-7 | 5.28E-7 | 2.70E-6   |     |      |
| NCI-H226                          | 0.785               | 1.627 | 1.519                  | 1.449 | 1.368 | 0.392 | 0.323 | 87   | 79             | 69   | -50  | -59  | 1.45E-6 | 3.80E-6 | 9.98E-6   |     |      |
| NCI-H23                           | 0.585               | 2.019 | 1.889                  | 1.851 | 0.720 | 0.206 | 0.107 | 91   | 88             | 9    | -65  | -82  | 3.06E-7 | 1.34E-6 | 6.31E-6   |     |      |
| NCI-H460                          | 0.283               | 1.899 | 1.897                  | 1.839 | 0.266 | 0.071 | 0.053 | 100  | 96             | -6   | -75  | -81  | 2.84E-7 | 8.74E-7 | 4.33E-6   |     |      |
| NCI-H522                          | 1.232               | 2.327 | 2.315                  | 2.299 | 1.603 | 0.423 | 0.020 | 99   | 97             | 34   | -66  | -98  | 5.57E-7 | 2.19E-6 | 6.95E-6   |     |      |
| <b>Colon Cancer</b>               |                     |       |                        |       |       |       |       |      |                |      |      |      |         |         |           |     |      |
| COLO 205                          | 0.277               | 0.770 | 0.743                  | 0.655 | 0.538 | 0.058 | 0.056 | 95   | 77             | 53   | -79  | -80  | 1.05E-6 | 2.51E-6 | 6.01E-6   |     |      |
| HCC-2998                          | 0.787               | 2.082 | 2.141                  | 2.129 | 1.979 | 0.115 | 0.040 | 105  | 104            | 92   | -85  | -95  | 1.72E-6 | 3.30E-6 | 6.31E-6   |     |      |
| HCT-116                           | 0.255               | 1.626 | 1.652                  | 1.599 | 1.272 | 0.163 | 0.123 | 102  | 98             | 74   | -36  | -52  | 1.66E-6 | 4.70E-6 | 7.69E-5   |     |      |
| HCT-15                            | 0.193               | 1.248 | 1.138                  | 0.981 | 0.416 | 0.036 | 0.028 | 90   | 75             | 21   | -81  | -86  | 2.88E-7 | 1.61E-6 | 4.94E-6   |     |      |
| HT29                              | 0.162               | 1.035 | 1.060                  | 1.031 | 1.024 | 0.112 | 0.062 | 103  | 100            | 99   | -31  | -62  | 2.38E-6 | 5.78E-6 | 4.11E-5   |     |      |
| KM12                              | 0.251               | 1.042 | 1.074                  | 1.045 | 0.844 | 0.173 | 0.046 | 104  | 100            | 75   | -31  | -82  | 1.72E-6 | 5.08E-6 | 2.35E-5   |     |      |
| SW-620                            | 0.199               | 1.134 | 1.082                  | 1.156 | 0.619 | 0.035 | 0.021 | 94   | 102            | 45   | -82  | -90  | 8.14E-7 | 2.25E-6 | 5.56E-6   |     |      |
| <b>CNS Cancer</b>                 |                     |       |                        |       |       |       |       |      |                |      |      |      |         |         |           |     |      |
| SF-268                            | 0.300               | 0.906 | 0.925                  | 0.866 | 0.673 | 0.266 | 0.131 | 103  | 93             | 61   | -12  | -56  | 1.44E-6 | 6.96E-6 | 7.22E-5   |     |      |
| SF-295                            | 1.032               | 2.686 | 2.796                  | 2.714 | 2.749 | 0.181 | 0.403 | 107  | 102            | 104  | -82  | -61  | 1.95E-6 | 3.61E-6 | 6.70E-6   |     |      |
| SF-539                            | 0.752               | 1.903 | 1.763                  | 1.730 | 1.580 | 0.015 | 0.008 | 88   | 85             | 72   | -98  | -99  | 1.35E-6 | 2.65E-6 | 5.22E-6   |     |      |
| SNB-19                            | 0.524               | 1.385 | 1.354                  | 1.288 | 0.845 | 0.087 | 0.021 | 96   | 89             | 37   | -83  | -96  | 5.67E-7 | 2.04E-6 | 5.29E-6   |     |      |
| SNB-75                            | 0.605               | 1.105 | 0.966                  | 0.957 | 0.669 | 0.070 | 0.083 | 72   | 70             | 13   | -89  | -86  | 2.26E-7 | 1.34E-6 | 4.17E-6   |     |      |
| U251                              | 0.248               | 1.235 | 1.226                  | 1.180 | 0.871 | 0.213 | 0.015 | 99   | 94             | 63   | -14  | -94  | 1.48E-6 | 6.56E-6 | 2.82E-5   |     |      |
| <b>Melanoma</b>                   |                     |       |                        |       |       |       |       |      |                |      |      |      |         |         |           |     |      |
| LOX IMVI                          | 0.296               | 1.831 | 1.630                  | 1.330 | 0.509 | 0.074 | 0.042 | 87   | 67             | 14   | -75  | -86  | 2.11E-7 | 1.43E-6 | 5.22E-6   |     |      |
| M14                               | 0.331               | 1.074 | 1.041                  | 0.735 | 0.036 | 0.025 | 0.012 | 96   | 54             | -89  | -92  | -96  | 1.07E-7 | 2.39E-7 | 5.33E-7   |     |      |
| MDA-MB-435                        | 0.523               | 2.014 | 2.103                  | 1.844 | 0.227 | 0.183 | 0.139 | 106  | 89             | -57  | -65  | -74  | 1.84E-7 | 4.07E-7 | 8.99E-7   |     |      |
| SK-MEL-2                          | 1.221               | 2.307 | 2.270                  | 2.224 | 2.126 | 1.413 | 0.198 | 97   | 92             | 83   | 18   | -84  | 3.22E-6 | 1.49E-5 | 4.64E-5   |     |      |
| SK-MEL-28                         | 0.345               | 0.857 | 0.922                  | 0.899 | 0.240 | 0.060 | 0.017 | 113  | 108            | -31  | -83  | -95  | 2.63E-7 | 6.02E-7 | 2.36E-6   |     |      |
| SK-MEL-5                          | 0.622               | 2.309 | 2.276                  | 2.035 | 0.017 | 0.018 | 0.011 | 98   | 84             | -97  | -97  | -98  | 1.54E-7 | 2.90E-7 | 5.48E-7   |     |      |
| UACC-257                          | 0.958               | 1.614 | 1.581                  | 1.632 | 1.585 | 0.076 | 0.028 | 95   | 103            | 96   | -92  | -97  | 1.75E-6 | 3.23E-6 | 5.97E-6   |     |      |
| UACC-62                           | 0.418               | 1.446 | 1.320                  | 1.275 | 1.052 | 0.059 | 0.017 | 88   | 83             | 62   | -86  | -96  | 1.20E-6 | 2.62E-6 | 5.71E-6   |     |      |
| <b>Ovarian Cancer</b>             |                     |       |                        |       |       |       |       |      |                |      |      |      |         |         |           |     |      |
| IGROV1                            | 0.326               | 0.912 | 0.742                  | 0.598 | 0.454 | 0.099 | 0.016 | 71   | 46             | 22   | -70  | -95  | 7.13E-8 | 1.73E-6 | 6.08E-6   |     |      |
| OVCAR-3                           | 0.359               | 0.878 | 0.890                  | 0.777 | 0.303 | 0.149 | 0.131 | 102  | 80             | -16  | -58  | -64  | 2.07E-7 | 6.88E-7 | 6.34E-6   |     |      |
| OVCAR-4                           | 0.491               | 1.373 | 1.321                  | 1.252 | 1.151 | 0.486 | 0.018 | 94   | 86             | 75   | -1   | -96  | 2.12E-6 | 9.67E-6 | 3.26E-5   |     |      |
| OVCAR-5                           | 0.492               | 1.145 | 1.160                  | 1.162 | 1.175 | 0.059 | 0.047 | 102  | 103            | 105  | -88  | -90  | 1.92E-6 | 3.49E-6 | 6.34E-6   |     |      |
| OVCAR-8                           | 0.509               | 1.808 | 1.799                  | 1.702 | 1.431 | 0.417 | 0.357 | 99   | 92             | 71   | -18  | -30  | 1.72E-6 | 6.27E-6 | > 1.00E-4 |     |      |
| NCI/ADR-RES                       | 0.588               | 1.645 | 1.663                  | 1.643 | 1.418 | 0.504 | 0.441 | 102  | 100            | 78   | -14  | -25  | 2.03E-6 | 7.01E-6 | > 1.00E-4 |     |      |
| SK-OV-3                           | 0.563               | 1.064 | 1.007                  | 0.969 | 0.892 | 0.441 | 0.064 | 89   | 81             | 66   | -22  | -89  | 1.51E-6 | 5.65E-6 | 2.65E-5   |     |      |
| <b>Renal Cancer</b>               |                     |       |                        |       |       |       |       |      |                |      |      |      |         |         |           |     |      |
| 786-0                             | 0.908               | 2.207 | 2.289                  | 2.345 | 2.235 | 0.772 | 0.082 | 106  | 111            | 102  | -15  | -91  | 2.79E-6 | 7.44E-6 | 2.89E-5   |     |      |
| A498                              | 0.948               | 1.471 | 1.506                  | 1.519 | 1.540 | 0.425 | 0.017 | 107  | 109            | 113  | -55  | -98  | 2.37E-6 | 4.70E-6 | 9.31E-6   |     |      |
| ACHN                              | 0.377               | 1.688 | 1.512                  | 1.370 | 1.102 | 0.451 | 0.056 | 87   | 76             | 55   | 6    | -85  | 1.28E-6 | 1.15E-5 | 4.09E-5   |     |      |
| CAKI-1                            | 0.991               | 2.535 | 2.449                  | 2.313 | 2.347 | 1.507 | 0.983 | 94   | 86             | 88   | 33   | -1   | 4.96E-6 | 9.44E-5 | > 1.00E-4 |     |      |
| RXF 393                           | 0.488               | 0.680 | 0.746                  | 0.698 | 0.647 | 0.484 | 0.051 | 134  | 109            | 83   | -1   | -90  | 2.46E-6 | 9.78E-6 | 3.58E-5   |     |      |
| SN12C                             | 0.397               | 1.358 | 1.257                  | 1.180 | 0.711 | 0.037 | 0.026 | 89   | 81             | 33   | -91  | -93  | 4.41E-7 | 1.84E-6 | 4.67E-6   |     |      |
| UO-31                             | 0.411               | 1.053 | 0.879                  | 0.821 | 0.641 | 0.258 | 0.016 | 73   | 64             | 36   | -37  | -96  | 3.13E-7 | 3.09E-6 | 1.64E-5   |     |      |
| <b>Prostate Cancer</b>            |                     |       |                        |       |       |       |       |      |                |      |      |      |         |         |           |     |      |
| DU-145                            | 0.243               | 0.799 | 0.843                  | 0.676 | 0.003 | 0.003 | 0.003 | 108  | 78             | -99  | -99  | -99  | 1.44E-7 | 2.76E-7 | 5.29E-7   |     |      |
| <b>Breast Cancer</b>              |                     |       |                        |       |       |       |       |      |                |      |      |      |         |         |           |     |      |
| MCF7                              | 0.216               | 1.001 | 0.988                  | 0.857 | 0.576 | 0.060 | 0.056 | 98   | 82             | 46   | -72  | -74  | 7.63E-7 | 2.44E-6 | 6.48E-6   |     |      |
| MDA-MB-231/ATCC                   | 0.493               | 1.124 | 1.025                  | 0.821 | 0.695 | 0.533 | 0.330 | 84   | 52             | 32   | 6    | -33  | 1.26E-7 | 1.44E-5 | > 1.00E-4 |     |      |
| HS 578T                           | 0.571               | 0.944 | 0.929                  | 0.896 | 0.503 | 0.351 | 0.277 | 96   | 87             | -12  | -39  | -51  | 2.37E-7 | 7.58E-7 | 7.68E-5   |     |      |
| T-47D                             | 0.512               | 1.039 | 1.007                  | 0.959 | 0.927 | 0.533 | 0.316 | 94   | 85             | 79   | 4    | -38  | 2.42E-6 | 1.24E-5 | > 1.00E-4 |     |      |
| MDA-MB-468                        | 0.446               | 0.922 | 0.949                  | 0.910 | 0.916 | 0.379 | 0.167 | 106  | 97             | 99   | -15  | -63  | 2.68E-6 | 7.38E-6 | 5.44E-5   |     |      |

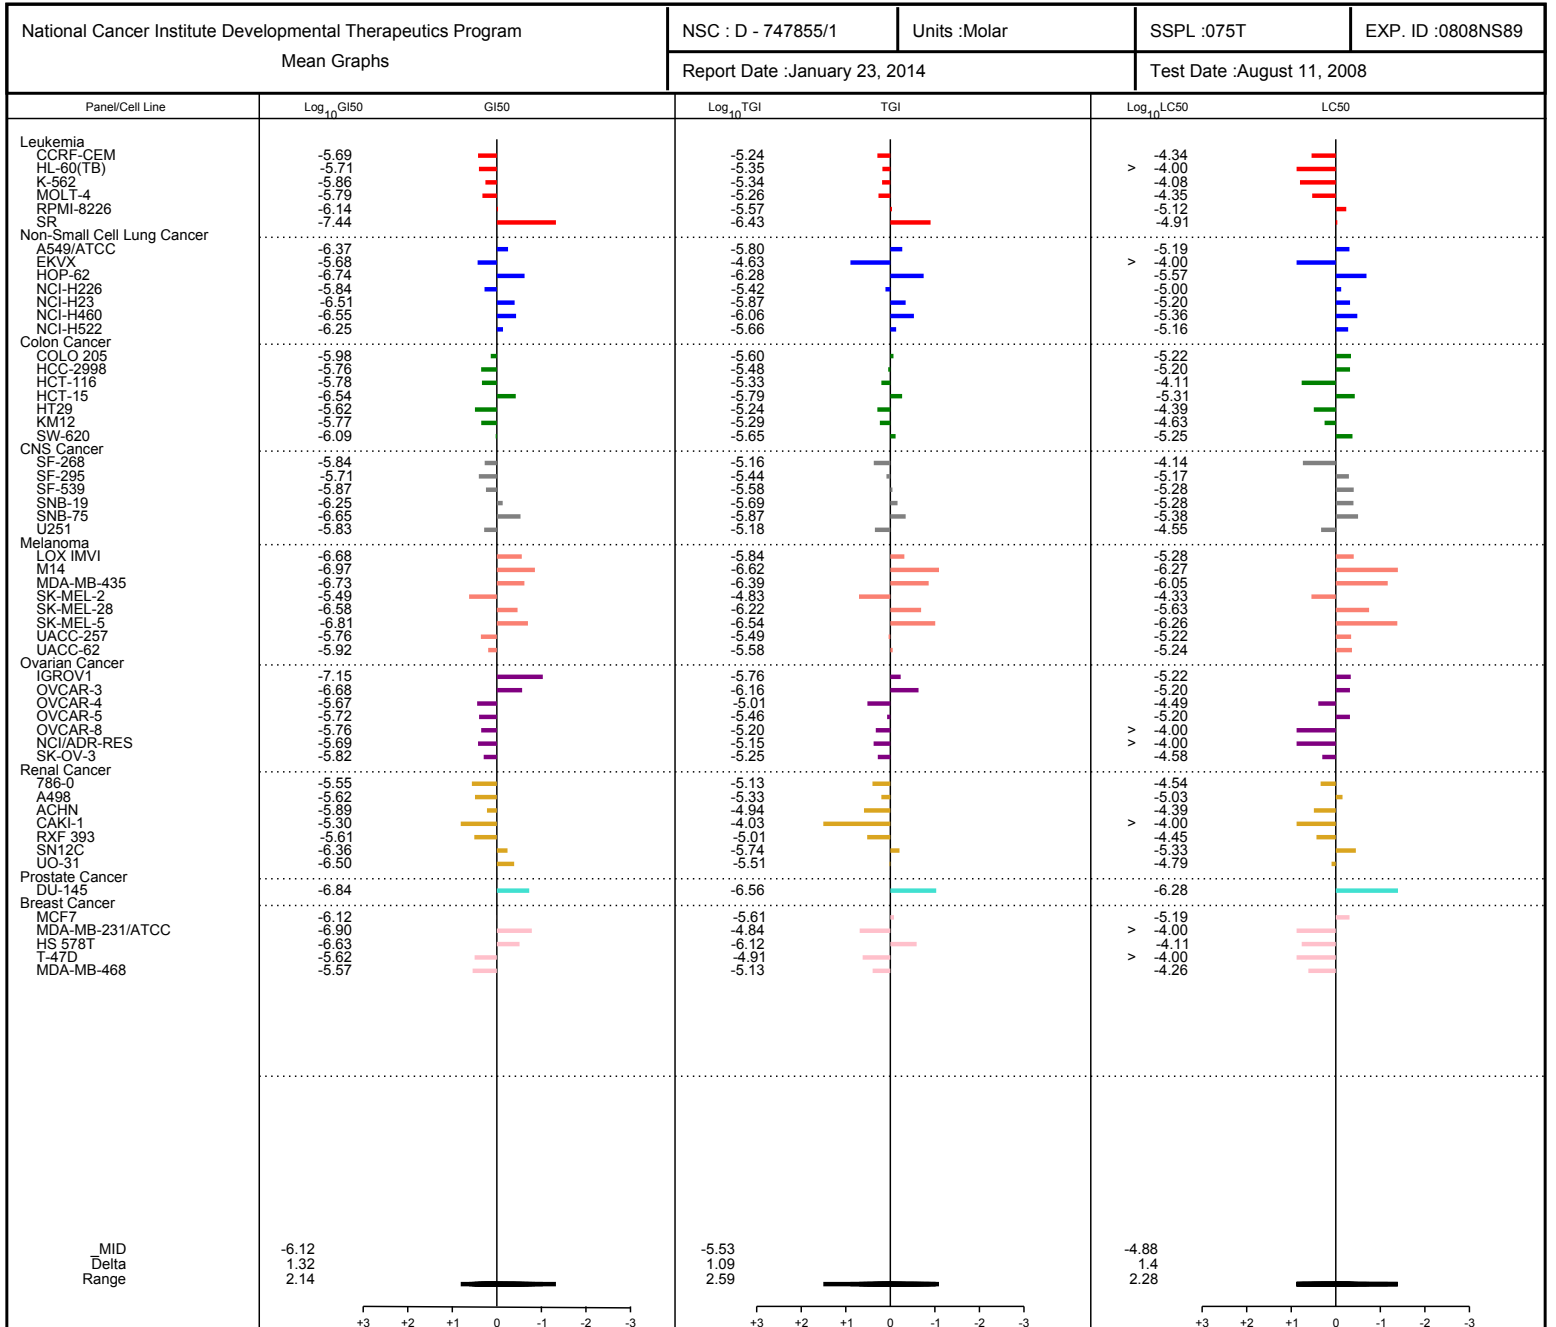

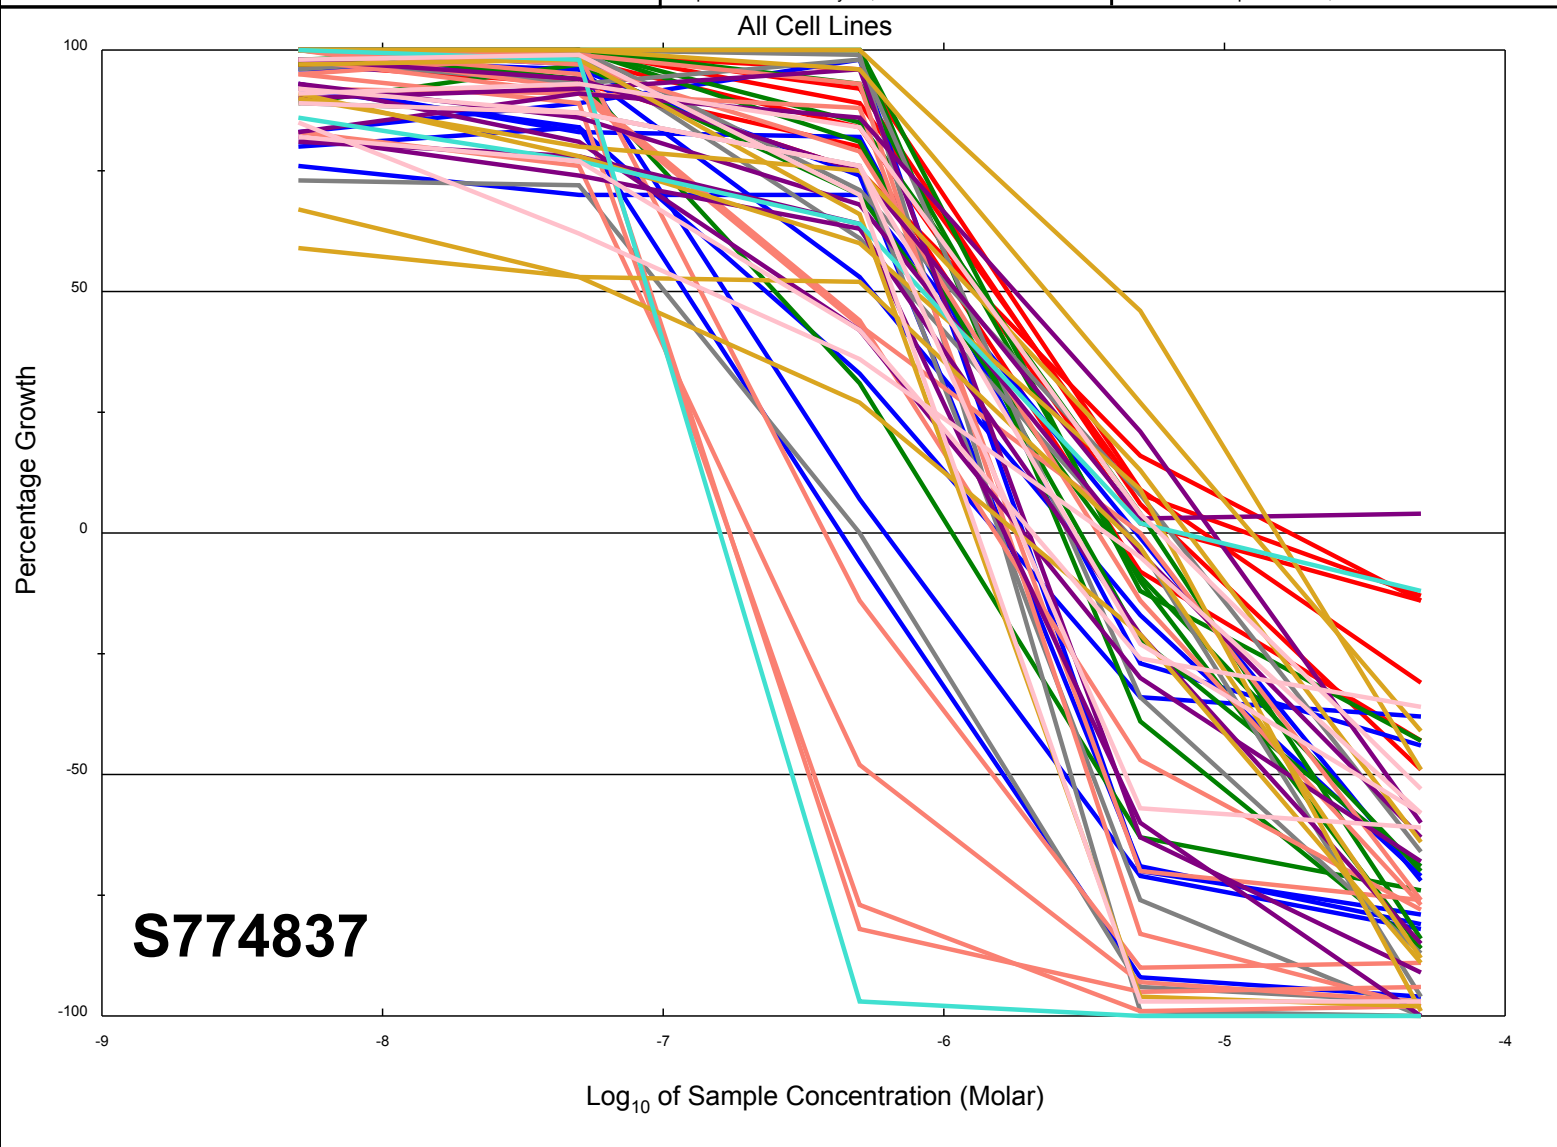

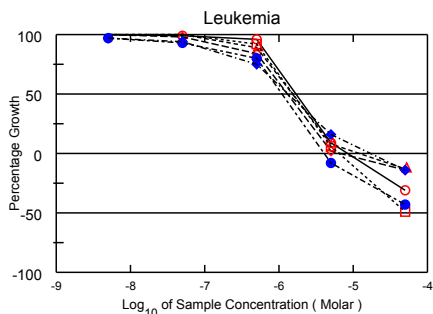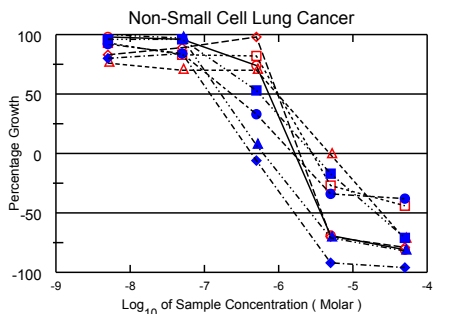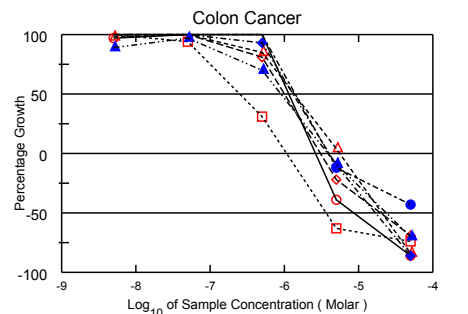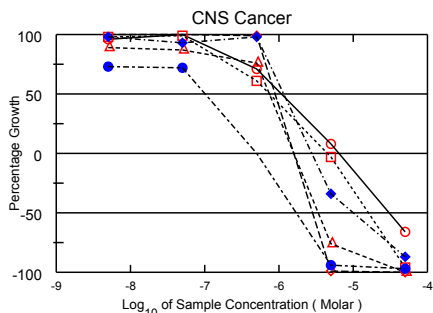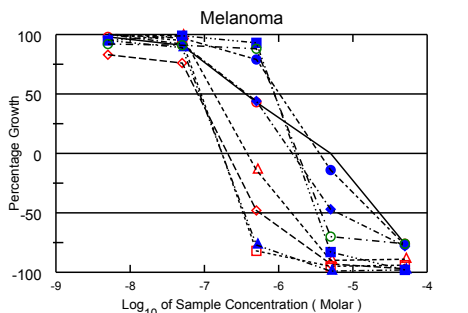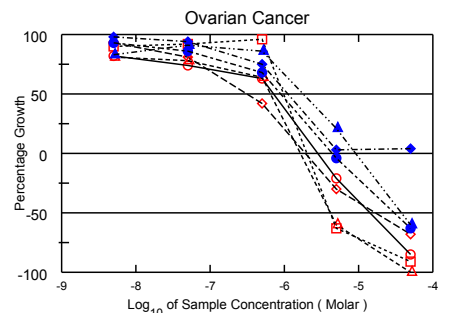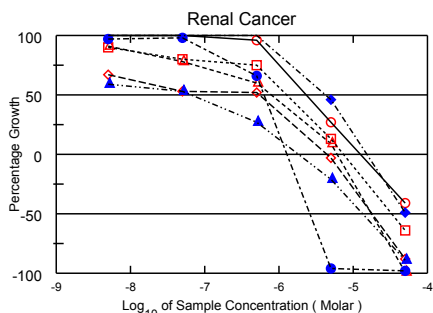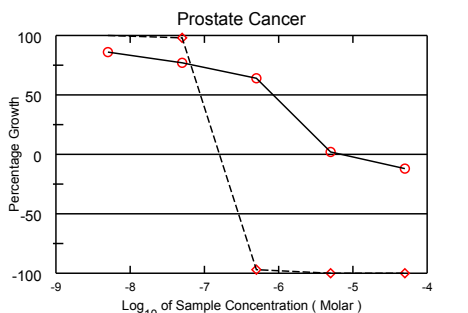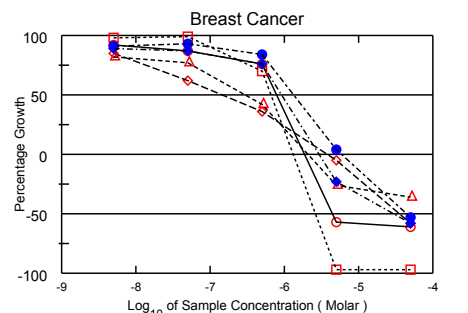

## National Cancer Institute Developmental Therapeutics Program In-Vitro Testing Results

|                                 |                                       |                |               |
|---------------------------------|---------------------------------------|----------------|---------------|
| NSC : D - 774837 / 1            | Experiment ID : 1309NS64              | Test Type : 08 | Units : Molar |
| Report Date : February 11, 2014 | Test Date : September 09, 2013        | QNS :          | MC :          |
| COMI : LT471 (130234)           | Stain Reagent : SRB Dual-Pass Related | SSPL : 075T    |               |

| Panel/Cell Line                   | Time<br>Zero | Log10 Concentration |       |                        |       |        |        |      |      |                |      |      | GI50    | TGI       | LC50      |  |  |
|-----------------------------------|--------------|---------------------|-------|------------------------|-------|--------|--------|------|------|----------------|------|------|---------|-----------|-----------|--|--|
|                                   |              | Ctrl                |       | Mean Optical Densities |       |        |        |      |      | Percent Growth |      |      |         |           |           |  |  |
|                                   |              | -8.3                | -7.3  | -6.3                   | -5.3  | -4.3   | -8.3   | -7.3 | -6.3 | -5.3           | -4.3 |      |         |           |           |  |  |
| <b>Leukemia</b>                   |              |                     |       |                        |       |        |        |      |      |                |      |      |         |           |           |  |  |
| CCRF-CEM                          | 0.719        | 3.153               | 3.205 | 3.137                  | 3.066 | 0.942  | 0.496  | 102  | 99   | 96             | 9    | -31  | 1.70E-6 | 8.45E-6   | > 5.00E-5 |  |  |
| HL-60(TB)                         | 0.687        | 2.910               | 3.041 | 2.873                  | 2.551 | 0.733  | 0.591  | 106  | 98   | 84             | 2    | -14  | 1.30E-6 | 6.70E-6   | > 5.00E-5 |  |  |
| K-562                             | 0.270        | 2.140               | 2.424 | 2.310                  | 1.929 | 0.423  | 0.236  | 115  | 109  | 89             | 8    | -13  | 1.51E-6 | 1.23E-5   | > 5.00E-5 |  |  |
| MOLT-4                            | 0.800        | 2.994               | 3.093 | 3.098                  | 2.812 | 0.941  | 0.409  | 105  | 105  | 92             | 6    | -49  | 1.54E-6 | 6.53E-6   | > 5.00E-5 |  |  |
| RPMI-8226                         | 0.897        | 2.599               | 2.547 | 2.476                  | 2.254 | 0.829  | 0.510  | 97   | 93   | 80             | -8   | -43  | 1.09E-6 | 4.09E-6   | > 5.00E-5 |  |  |
| SR                                | 0.363        | 1.609               | 1.567 | 1.532                  | 1.294 | 0.565  | 0.313  | 97   | 94   | 75             | 16   | -14  | 1.32E-6 | 1.72E-5   | > 5.00E-5 |  |  |
| <b>Non-Small Cell Lung Cancer</b> |              |                     |       |                        |       |        |        |      |      |                |      |      |         |           |           |  |  |
| A549/ATCC                         | 0.429        | 2.220               | 2.186 | 2.155                  | 1.757 | 0.132  | 0.080  | 98   | 96   | 74             | -69  | -81  | 7.37E-7 | 1.64E-6   | 3.67E-6   |  |  |
| HOP-62                            | 0.530        | 1.214               | 1.099 | 1.138                  | 1.201 | 0.158  | 0.110  | 83   | 89   | 98             | -70  | -79  | 9.65E-7 | 1.91E-6   | 3.79E-6   |  |  |
| HOP-92                            | 1.034        | 1.578               | 1.446 | 1.415                  | 1.413 | 1.027  | 0.290  | 76   | 70   | 70             | -1   | -72  | 9.50E-7 | 4.88E-6   | 2.46E-5   |  |  |
| NCI-H226                          | 1.344        | 2.942               | 2.826 | 2.669                  | 2.647 | 0.977  | 0.750  | 93   | 83   | 82             | -27  | -44  | 9.74E-7 | 2.81E-6   | > 5.00E-5 |  |  |
| NCI-H23                           | 0.703        | 2.103               | 1.989 | 1.884                  | 1.160 | 0.466  | 0.437  | 92   | 84   | 33             | -34  | -38  | 2.31E-7 | 1.55E-6   | > 5.00E-5 |  |  |
| NCI-H322M                         | 0.872        | 1.710               | 1.545 | 1.576                  | 0.822 | 0.073  | 0.031  | 80   | 84   | -6             | -92  | -96  | 1.20E-7 | 4.31E-7   | 1.64E-6   |  |  |
| NCI-H460                          | 0.156        | 1.761               | 1.764 | 1.711                  | 0.270 | 0.046  | 0.029  | 100  | 97   | 7              | -71  | -82  | 1.66E-7 | 6.17E-7   | 2.70E-6   |  |  |
| NCI-H522                          | 1.015        | 2.312               | 2.265 | 2.257                  | 1.697 | 0.845  | 0.292  | 96   | 96   | 53             | -17  | -71  | 5.44E-7 | 2.86E-6   | 2.04E-5   |  |  |
| <b>Colon Cancer</b>               |              |                     |       |                        |       |        |        |      |      |                |      |      |         |           |           |  |  |
| COLO 205                          | 0.422        | 1.814               | 1.778 | 1.844                  | 1.837 | 0.259  | 0.061  | 97   | 102  | 102            | -39  | -86  | 1.17E-6 | 2.65E-6   | 8.73E-6   |  |  |
| HCC-2998                          | 0.380        | 1.407               | 1.445 | 1.416                  | 1.214 | 0.296  | 0.120  | 104  | 101  | 81             | -22  | -69  | 1.00E-6 | 3.05E-6   | 1.99E-5   |  |  |
| HCT-116                           | 0.223        | 2.253               | 2.218 | 2.285                  | 1.948 | 0.309  | 0.037  | 98   | 102  | 85             | 4    | -84  | 1.36E-6 | 5.59E-6   | 2.07E-5   |  |  |
| HCT-15                            | 0.252        | 1.361               | 1.398 | 1.294                  | 0.601 | 0.092  | 0.066  | 103  | 94   | 31             | -63  | -74  | 2.52E-7 | 1.07E-6   | 3.60E-6   |  |  |
| HT29                              | 0.298        | 1.631               | 1.668 | 1.764                  | 1.743 | 0.262  | 0.170  | 103  | 110  | 108            | -12  | -43  | 1.53E-6 | 3.97E-6   | > 5.00E-5 |  |  |
| KM12                              | 0.339        | 1.602               | 1.639 | 1.672                  | 1.508 | 0.305  | 0.046  | 103  | 106  | 93             | -10  | -86  | 1.30E-6 | 3.99E-6   | 1.67E-5   |  |  |
| SW-620                            | 0.208        | 1.418               | 1.290 | 1.378                  | 1.058 | 0.189  | 0.063  | 89   | 97   | 70             | -9   | -70  | 9.00E-7 | 3.84E-6   | 2.35E-5   |  |  |
| <b>CNS Cancer</b>                 |              |                     |       |                        |       |        |        |      |      |                |      |      |         |           |           |  |  |
| SF-268                            | 0.630        | 1.729               | 1.685 | 1.725                  | 1.412 | 0.719  | 0.217  | 96   | 100  | 71             | 8    | -66  | 1.08E-6 | 6.44E-6   | 3.07E-5   |  |  |
| SF-295                            | 1.089        | 2.798               | 2.867 | 2.875                  | 2.788 | 0.010  | -0.003 | 104  | 104  | 99             | -99  | -100 | 8.87E-7 | 1.58E-6   | 2.83E-6   |  |  |
| SF-539                            | 0.874        | 2.572               | 2.392 | 2.356                  | 2.159 | 0.213  | 0.003  | 89   | 87   | 76             | -76  | -100 | 7.39E-7 | 1.58E-6   | 3.38E-6   |  |  |
| SNB-19                            | 0.803        | 2.143               | 2.119 | 2.129                  | 1.622 | 0.782  | 0.031  | 98   | 99   | 61             | -3   | -96  | 7.47E-7 | 4.55E-6   | 1.61E-5   |  |  |
| SNB-75                            | 0.673        | 1.360               | 1.173 | 1.165                  | 0.672 | 0.042  | 0.017  | 73   | 72   | .              | -94  | -97  | 9.99E-8 | 4.98E-7   | 1.70E-6   |  |  |
| U251                              | 0.766        | 2.604               | 2.565 | 2.469                  | 2.563 | 0.505  | 0.099  | 98   | 93   | 98             | -34  | -87  | 1.15E-6 | 2.75E-6   | 9.96E-6   |  |  |
| <b>Melanoma</b>                   |              |                     |       |                        |       |        |        |      |      |                |      |      |         |           |           |  |  |
| LOX IMVI                          | 0.427        | 2.835               | 2.778 | 2.621                  | 1.475 | 0.427  | 0.101  | 98   | 91   | 43             | .    | -76  | 3.65E-7 | 4.97E-6   | 2.25E-5   |  |  |
| MALME-3M                          | 0.698        | 1.105               | 1.035 | 1.007                  | 0.364 | 0.047  | 0.020  | 83   | 76   | -48            | -93  | -97  | 8.10E-8 | 2.05E-7   | 5.58E-7   |  |  |
| M14                               | 0.524        | 2.290               | 2.285 | 2.273                  | 0.449 | 0.055  | 0.058  | 100  | 99   | -14            | -90  | -89  | 1.35E-7 | 3.74E-7   | 1.49E-6   |  |  |
| MDA-MB-435                        | 0.503        | 2.183               | 2.227 | 2.104                  | 0.090 | 0.025  | 0.029  | 103  | 95   | -82            | -95  | -94  | 9.00E-8 | 1.72E-7   | 3.30E-7   |  |  |
| SK-MEL-2                          | 1.302        | 2.465               | 2.475 | 2.426                  | 2.223 | 1.115  | 0.295  | 101  | 97   | 79             | -14  | -77  | 1.03E-6 | 3.51E-6   | 1.84E-5   |  |  |
| SK-MEL-28                         | 0.643        | 1.867               | 1.884 | 1.773                  | 1.181 | 0.339  | 0.142  | 101  | 92   | 44             | -47  | -78  | 3.75E-7 | 1.51E-6   | 6.10E-6   |  |  |
| SK-MEL-5                          | 1.012        | 3.163               | 3.062 | 2.931                  | 0.228 | 0.009  | 0.020  | 95   | 89   | -77            | -99  | -98  | 8.59E-8 | 1.71E-7   | 3.42E-7   |  |  |
| UACC-257                          | 0.873        | 1.956               | 1.906 | 1.950                  | 1.885 | 0.146  | 0.016  | 95   | 99   | 93             | -83  | -98  | 8.81E-7 | 1.69E-6   | 3.24E-6   |  |  |
| UACC-62                           | 0.789        | 2.315               | 2.197 | 2.185                  | 2.132 | 0.234  | 0.190  | 92   | 91   | 88             | -70  | -76  | 8.69E-7 | 1.80E-6   | 3.72E-6   |  |  |
| <b>Ovarian Cancer</b>             |              |                     |       |                        |       |        |        |      |      |                |      |      |         |           |           |  |  |
| IGROV1                            | 0.738        | 1.983               | 1.763 | 1.653                  | 1.524 | 0.585  | 0.113  | 82   | 74   | 63             | -21  | -85  | 7.16E-7 | 2.83E-6   | 1.43E-5   |  |  |
| OVCAR-3                           | 0.547        | 1.546               | 1.477 | 1.360                  | 0.971 | 0.381  | 0.173  | 93   | 81   | 42             | -30  | -68  | 3.19E-7 | 1.91E-6   | 1.64E-5   |  |  |
| OVCAR-4                           | 0.704        | 1.368               | 1.239 | 1.223                  | 1.128 | 0.283  | -0.001 | 81   | 78   | 64             | -60  | -100 | 6.47E-7 | 1.64E-6   | 4.17E-6   |  |  |
| OVCAR-5                           | 0.585        | 1.723               | 1.609 | 1.632                  | 1.679 | 0.217  | 0.054  | 90   | 92   | 96             | -63  | -91  | 9.75E-7 | 2.01E-6   | 4.14E-6   |  |  |
| OVCAR-8                           | 0.562        | 2.275               | 2.159 | 2.042                  | 1.731 | 0.538  | 0.210  | 93   | 86   | 68             | -4   | -63  | 8.93E-7 | 4.37E-6   | 3.03E-5   |  |  |
| NCI/ADR-RES                       | 0.595        | 1.999               | 1.973 | 1.911                  | 1.645 | 0.640  | 0.649  | 98   | 94   | 75             | 3    | 4    | 1.11E-6 | > 5.00E-5 | > 5.00E-5 |  |  |
| SK-OV-3                           | 0.550        | 1.468               | 1.312 | 1.386                  | 1.339 | 0.740  | 0.219  | 83   | 91   | 86             | 21   | -60  | 1.78E-6 | 9.00E-6   | 3.73E-5   |  |  |
| <b>Renal Cancer</b>               |              |                     |       |                        |       |        |        |      |      |                |      |      |         |           |           |  |  |
| 786-0                             | 0.453        | 2.015               | 2.100 | 2.094                  | 1.947 | 0.869  | 0.267  | 105  | 105  | 96             | 27   | -41  | 2.29E-6 | 1.23E-5   | > 5.00E-5 |  |  |
| A498                              | 1.817        | 2.467               | 2.252 | 2.161                  | 2.154 | 1.761  | 0.219  | 67   | 53   | 52             | -3   | -88  | 5.39E-7 | 4.39E-6   | 1.79E-5   |  |  |
| ACHN                              | 0.389        | 1.943               | 1.795 | 1.603                  | 1.326 | 0.529  | 0.006  | 91   | 78   | 60             | 9    | -99  | 7.94E-7 | 6.06E-6   | 1.77E-5   |  |  |
| RXF 393                           | 0.937        | 1.977               | 1.870 | 1.770                  | 1.719 | 1.068  | 0.342  | 90   | 80   | 75             | 13   | -64  | 1.26E-6 | 7.32E-6   | 3.32E-5   |  |  |
| SN12C                             | 0.639        | 2.031               | 1.985 | 1.998                  | 1.564 | 0.024  | 0.011  | 97   | 98   | 66             | -96  | -98  | 6.31E-7 | 1.28E-6   | 2.60E-6   |  |  |
| TK-10                             | 0.884        | 1.663               | 1.962 | 2.016                  | 2.073 | 1.242  | 0.450  | 138  | 145  | 153            | 46   | -49  | 4.58E-6 | 1.52E-5   | > 5.00E-5 |  |  |
| UO-31                             | 0.668        | 1.777               | 1.321 | 1.256                  | 0.967 | 0.531  | 0.073  | 59   | 53   | 27             | -21  | -89  | 6.54E-8 | 1.84E-6   | 1.34E-5   |  |  |
| <b>Prostate Cancer</b>            |              |                     |       |                        |       |        |        |      |      |                |      |      |         |           |           |  |  |
| PC-3                              | 0.538        | 2.040               | 1.832 | 1.694                  | 1.506 | 0.565  | 0.476  | 86   | 77   | 64             | 2    | -12  | 8.49E-7 | 6.77E-6   | > 5.00E-5 |  |  |
| DU-145                            | 0.350        | 1.182               | 1.250 | 1.162                  | 0.011 | -0.008 | -0.006 | 108  | 98   | -97            | -100 | -100 | 8.78E-8 | 1.59E-7   | 2.87E-7   |  |  |
| <b>Breast Cancer</b>              |              |                     |       |                        |       |        |        |      |      |                |      |      |         |           |           |  |  |
| MCF7                              | 0.578        | 2.213               | 2.088 | 2.005                  | 1.816 | 0.251  | 0.227  | 92   | 87   | 76             | -57  | -61  | 7.82E-7 | 1.87E-6   | 4.45E-6   |  |  |
| MDA-MB-231/ATCC                   | 0.584        | 1.350               | 1.234 | 1.057                  | 0.861 | 0.555  | 0.244  | 85   | 62   | 36             | -5   | -58  | 1.43E-7 | 3.78E-6   | 3.50E-5   |  |  |
| HS 578T                           | 0.614        | 1.382               | 1.242 | 1.204                  | 0.933 | 0.452  | 0.396  | 82   | 77   | 42             | -26  | -36  | 2.88E-7 | 2.04E-6   | > 5.00E-5 |  |  |
| BT-549                            | 1.051        | 1.963               | 1.941 | 1.955                  | 1.686 | 0.029  | 0.032  | 98   | 99   | 70             | -97  | -97  | 6.55E-7 | 1.31E-6   | 2.60E-6   |  |  |
| T-47D                             | 0.480        | 1.043               | 0.991 | 1.003                  | 0.955 | 0.500  | 0.226  | 91   | 93   | 84             | 4    | -53  | 1.33E-6 | 5.78E-6   | 4.42E-5   |  |  |
| MDA-MB-468                        | 0.805        | 1.796               | 1.689 | 1.664                  | 1.557 | 0.618  | 0.340  | 89   | 87   | 76             | -23  | -58  | 9.12E-7 | 2.91E-6   | 2.97E-5   |  |  |

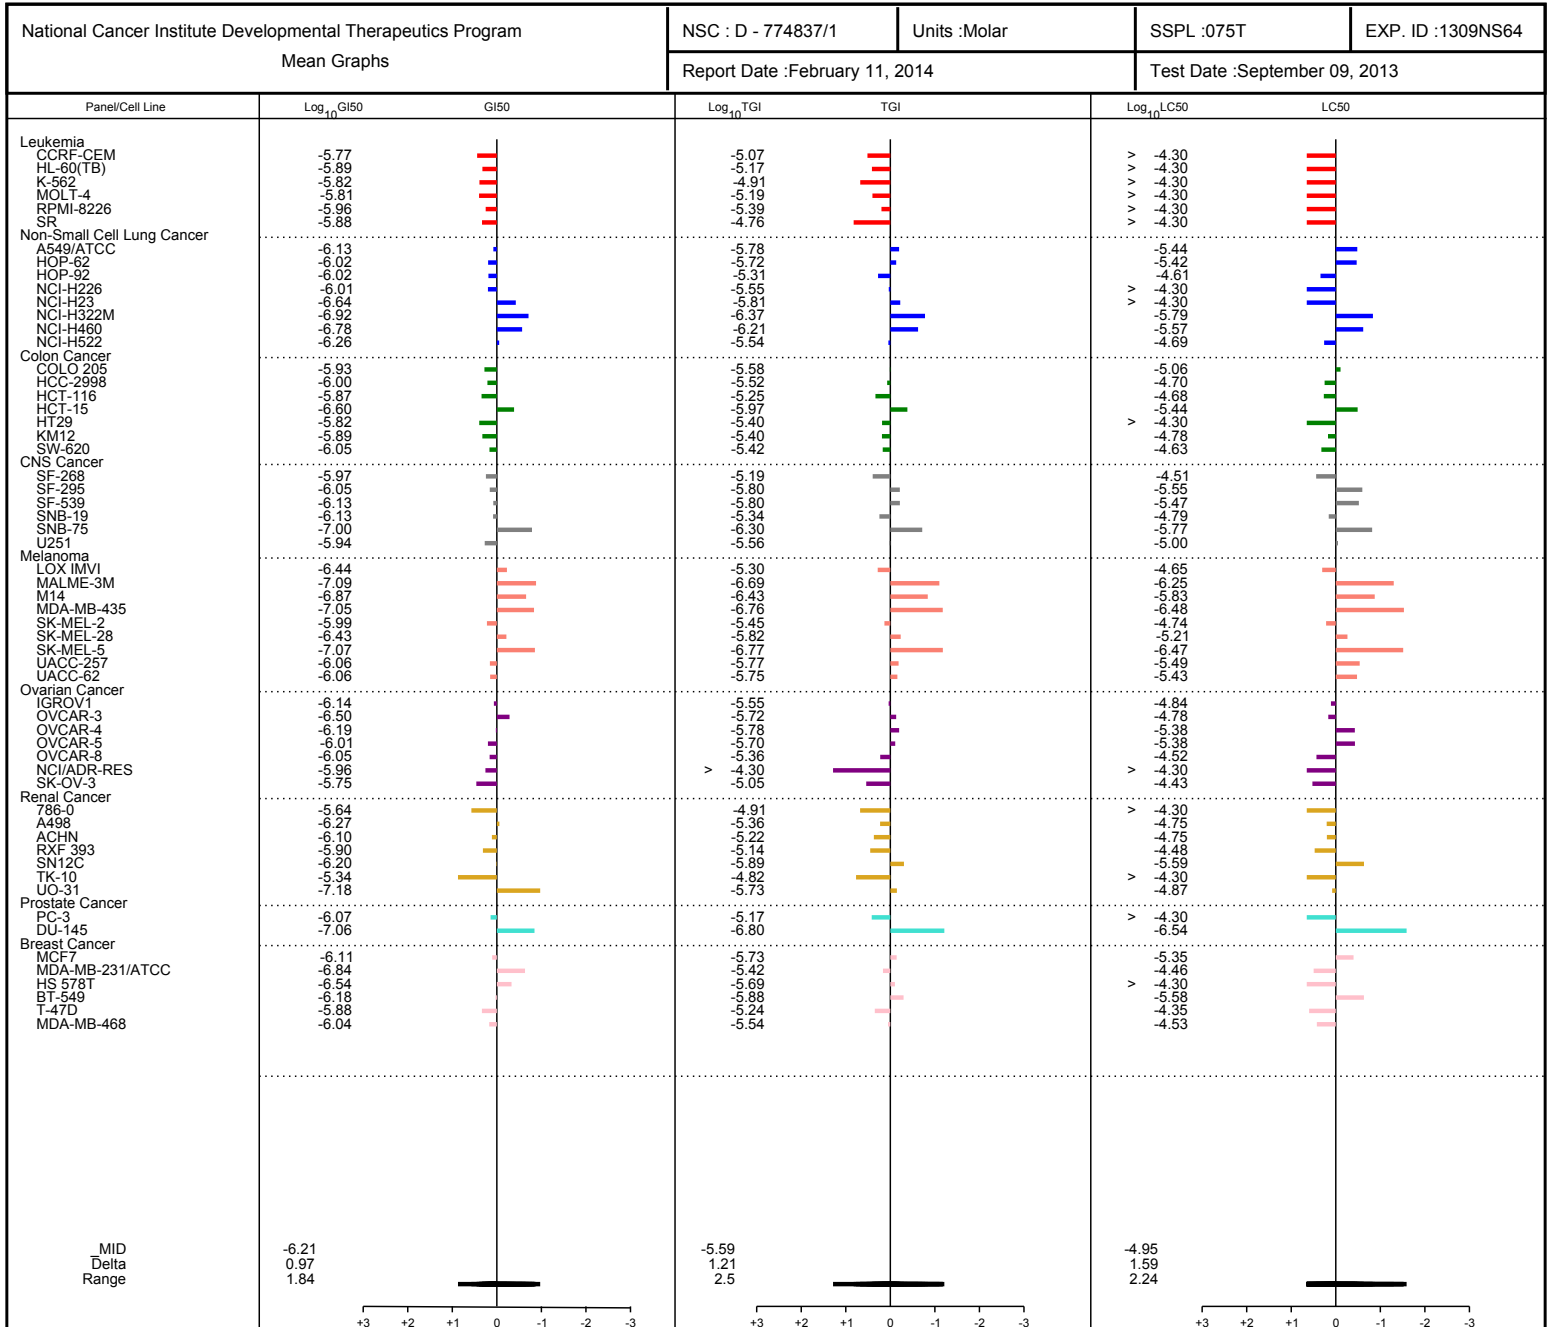

**One Dose Mean Graph**

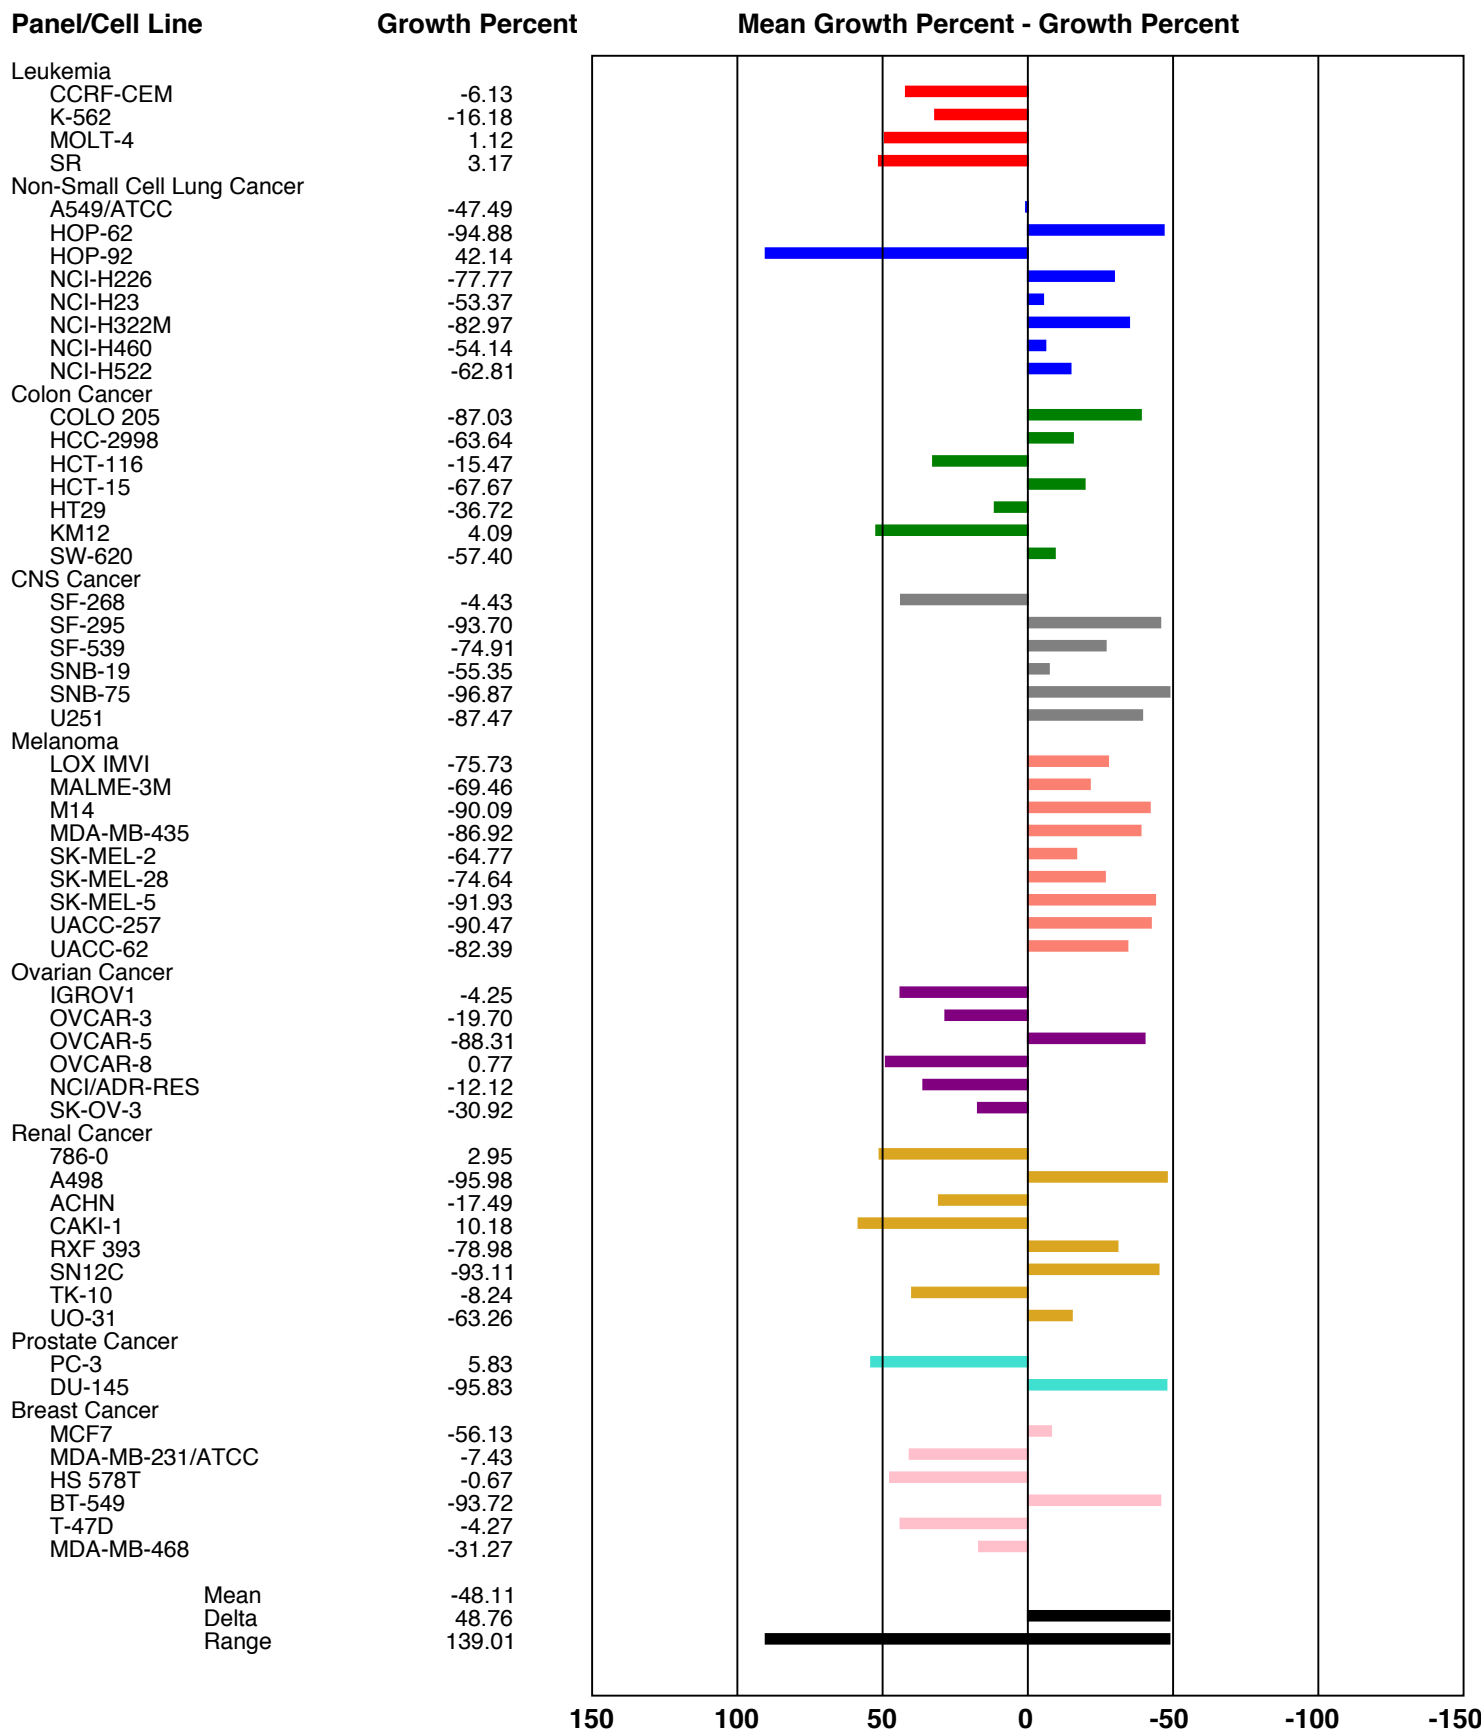

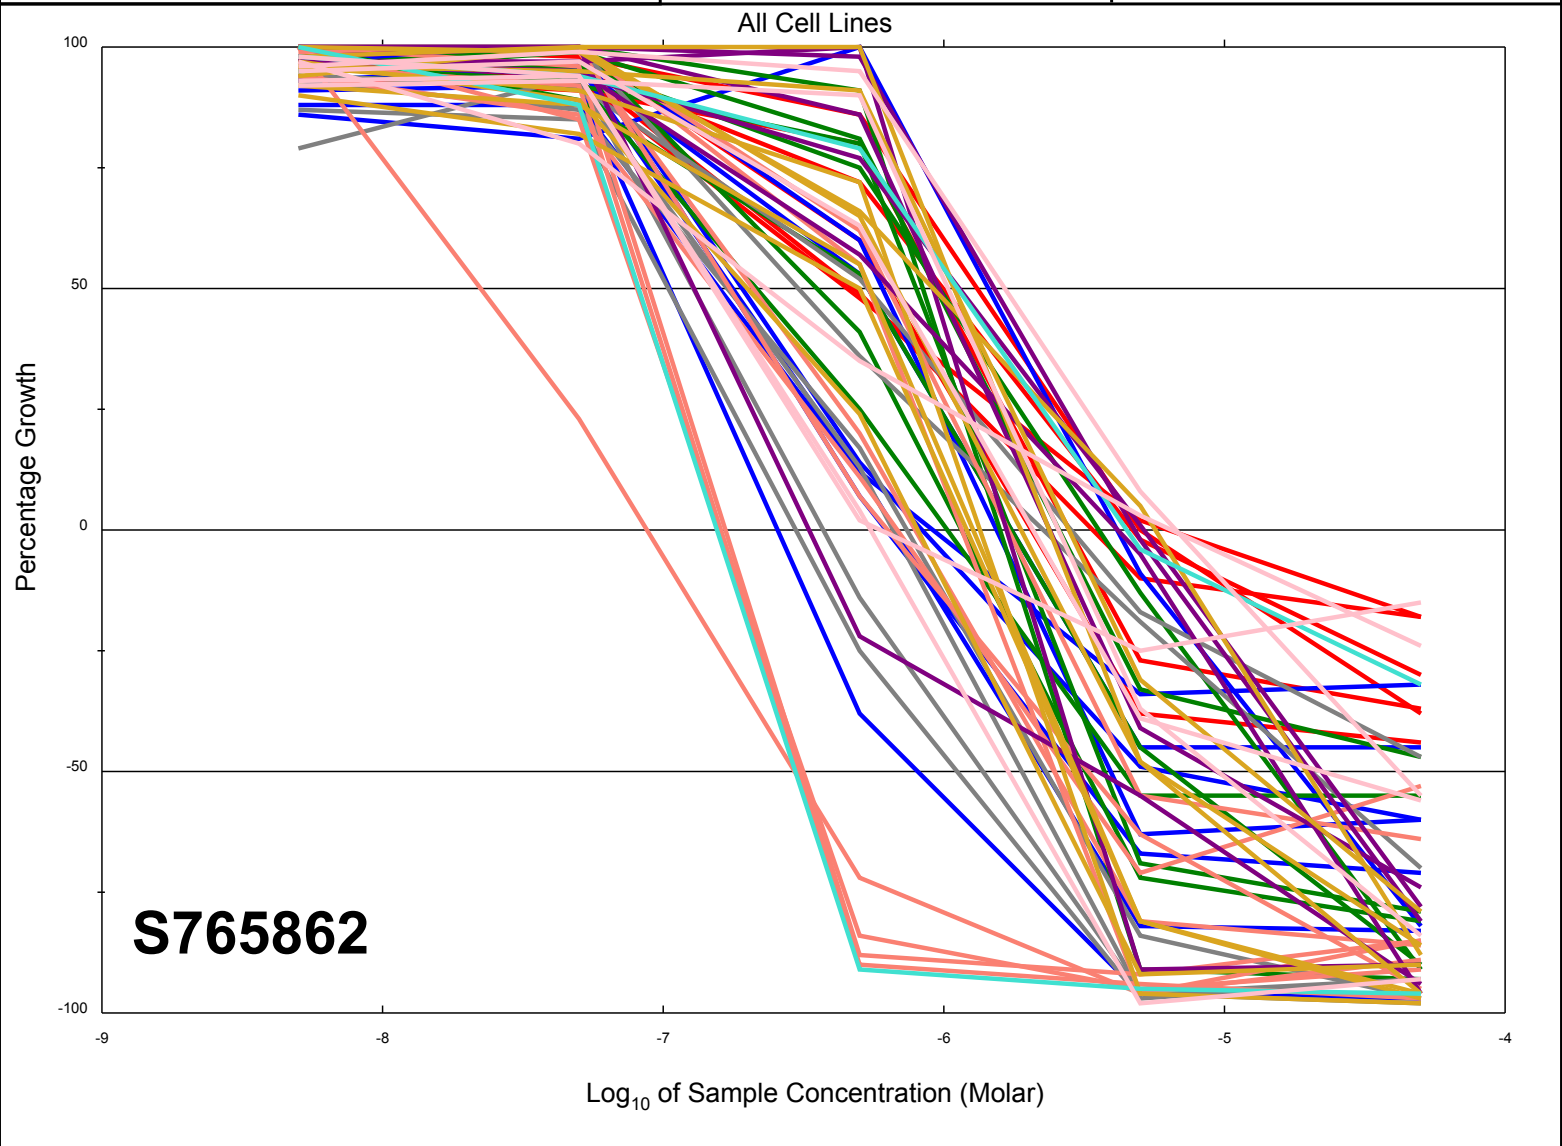



National Cancer Institute Developmental Therapeutics Program  
Dose Response Curves

NSC: D - 765862 / 1  
Report Date: January 23, 2014

SSPL: 075T  
Test Date: August 06, 2012

EXP. ID: 1208NS22

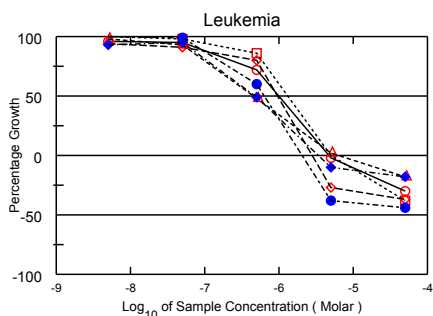

CCRF-CEM —○—  
MOLT-4 —□—  
HL-60(TB) —◇—  
RPMI-8226 —●—  
K-562 —△—  
SR —◆—

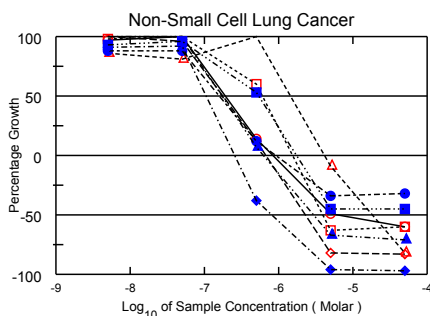

A549/ATCC —○—  
NCI-H226 —□—  
NCI-H460 —△—  
HOP-62 —◇—  
NCI-H23 —●—  
NCI-H522 —◆—  
HOP-92 —△—  
NCI-H322M —◆—

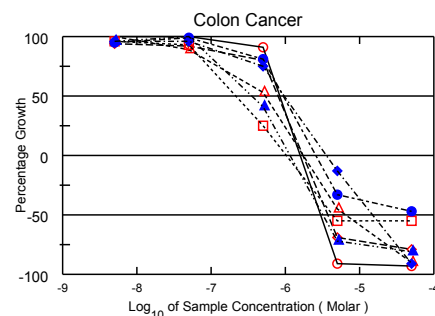

COLO 205 —○—  
HCT-15 —□—  
SW-620 —△—  
HCC-2998 —◇—  
HT29 —●—  
HCT-116 —△—  
KM12 —◆—

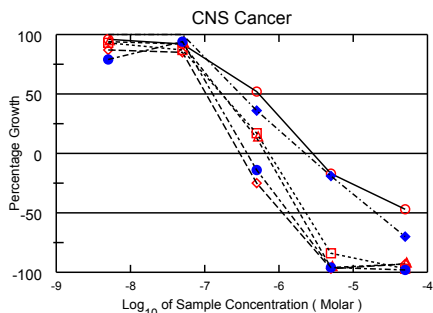

SF-268 —○—  
SNB-19 —□—  
SF-295 —◇—  
SNB-75 —●—  
SF-539 —△—  
U251 —◆—

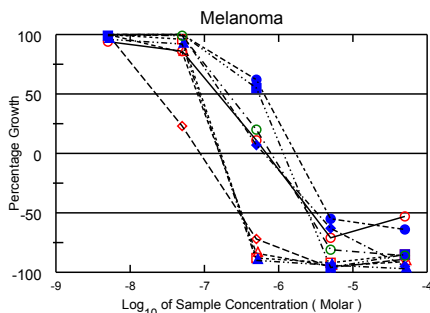

LOX IMVI —○—  
MDA-MB-435 —□—  
SK-MEL-5 —△—  
MALME-3M —◇—  
SK-MEL-2 —●—  
UACC-257 —◆—  
M14 —△—  
SK-MEL-28 —◆—  
UACC-62 —○—

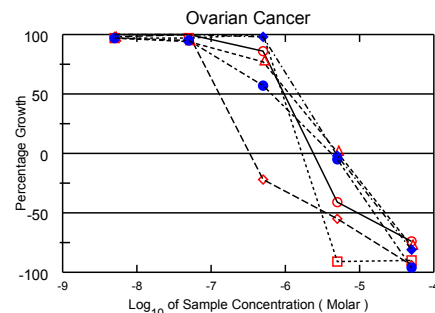

IGROV1 —○—  
OV5 —□—  
OV5 —◇—  
OV3 —●—  
OV8 —◆—  
OV4 —△—  
SK-OV-3 —◆—

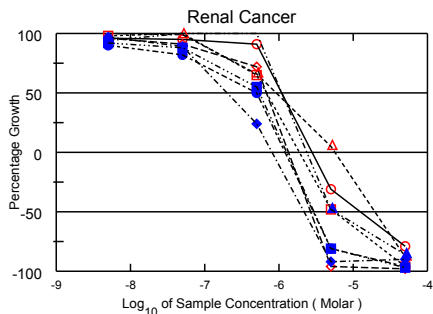

786-0 —○—  
CAKI-1 —□—  
TK-10 —△—  
A498 —◇—  
RXF 393 —●—  
UO-31 —◆—  
ACHN —△—  
SN12C —◆—

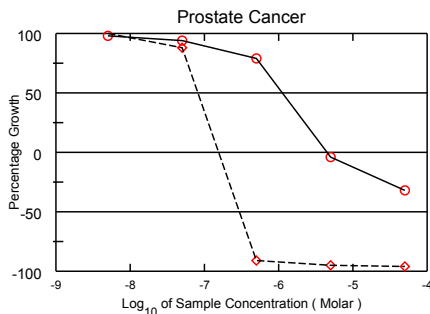

PC-3 —○—  
DU-145 —◇—

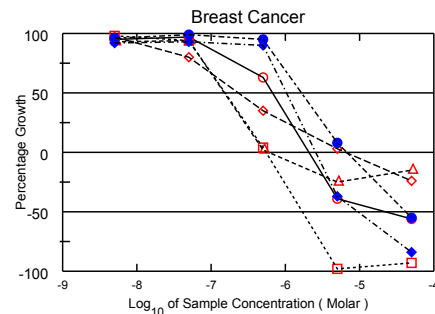

MCF7 —○—  
BT-549 —□—  
MDA-MB-231/ —◇—  
T-47D —●—  
MDA-MB-468 —◆—  
HS 578T —△—

## National Cancer Institute Developmental Therapeutics Program In-Vitro Testing Results

|                                |                                       |                |               |
|--------------------------------|---------------------------------------|----------------|---------------|
| NSC : D - 765862 / 1           | Experiment ID : 1208NS22              | Test Type : 08 | Units : Molar |
| Report Date : January 23, 2014 | Test Date : August 06, 2012           | QNS :          | MC :          |
| COMI : LT415 (119558)          | Stain Reagent : SRB Dual-Pass Related | SSPL : 075T    |               |

| Panel/Cell Line                   | Time<br>Zero | Log10 Concentration |       |                        |       |       |       |      |                |      |      |     | GI50    | TGI     | LC50      |  |
|-----------------------------------|--------------|---------------------|-------|------------------------|-------|-------|-------|------|----------------|------|------|-----|---------|---------|-----------|--|
|                                   |              | Ctrl                |       | Mean Optical Densities |       |       |       |      | Percent Growth |      |      |     |         |         |           |  |
|                                   |              | -8.3                | -7.3  | -6.3                   | -5.3  | -4.3  | -8.3  | -7.3 | -6.3           | -5.3 | -4.3 |     |         |         |           |  |
| <b>Leukemia</b>                   |              |                     |       |                        |       |       |       |      |                |      |      |     |         |         |           |  |
| CCRF-CEM                          | 0.433        | 2.334               | 2.257 | 2.244                  | 1.805 | 0.425 | 0.302 | 96   | 95             | 72   | -2   | -30 | 9.96E-7 | 4.70E-6 | > 5.00E-5 |  |
| HL-60(TB)                         | 0.656        | 2.554               | 2.441 | 2.380                  | 2.178 | 0.480 | 0.414 | 94   | 91             | 80   | -27  | -37 | 9.57E-7 | 2.81E-6 | > 5.00E-5 |  |
| K-562                             | 0.193        | 1.820               | 1.783 | 1.700                  | 0.980 | 0.226 | 0.158 | 98   | 93             | 48   | 2    | -18 | 4.59E-7 | 6.28E-6 | > 5.00E-5 |  |
| MOLT-4                            | 0.504        | 2.124               | 2.130 | 2.091                  | 1.900 | 0.503 | 0.312 | 100  | 98             | 86   | .    | -38 | 1.31E-6 | 4.96E-6 | > 5.00E-5 |  |
| RPMI-8226                         | 0.821        | 2.477               | 2.538 | 2.453                  | 1.819 | 0.513 | 0.462 | 104  | 99             | 60   | -38  | -44 | 6.37E-7 | 2.07E-6 | > 5.00E-5 |  |
| SR                                | 0.542        | 2.606               | 2.453 | 2.508                  | 1.549 | 0.487 | 0.445 | 93   | 95             | 49   | -10  | -18 | 4.71E-7 | 3.36E-6 | > 5.00E-5 |  |
| <b>Non-Small Cell Lung Cancer</b> |              |                     |       |                        |       |       |       |      |                |      |      |     |         |         |           |  |
| A549/ATCC                         | 0.324        | 1.856               | 1.817 | 1.952                  | 0.541 | 0.167 | 0.130 | 97   | 106            | 14   | -49  | -60 | 2.04E-7 | 8.40E-7 | 6.64E-6   |  |
| HOP-62                            | 0.404        | 1.313               | 1.358 | 1.276                  | 0.511 | 0.073 | 0.068 | 105  | 96             | 12   | -82  | -83 | 1.75E-7 | 6.67E-7 | 2.28E-6   |  |
| HOP-92                            | 1.325        | 1.681               | 1.631 | 1.614                  | 1.721 | 1.203 | 0.244 | 86   | 81             | 111  | -9   | -82 | 1.61E-6 | 4.19E-6 | 1.83E-5   |  |
| NCI-H226                          | 0.687        | 1.154               | 1.144 | 1.160                  | 0.968 | 0.251 | 0.273 | 98   | 101            | 60   | -63  | -60 | 6.05E-7 | 1.53E-6 | 3.89E-6   |  |
| NCI-H23                           | 1.103        | 3.185               | 2.943 | 2.934                  | 1.344 | 0.726 | 0.750 | 88   | 88             | 12   | -34  | -32 | 1.57E-7 | 8.95E-7 | > 5.00E-5 |  |
| NCI-H322M                         | 0.838        | 1.634               | 1.561 | 1.573                  | 0.521 | 0.035 | 0.025 | 91   | 92             | -38  | -96  | -97 | 1.06E-7 | 2.56E-7 | 8.10E-7   |  |
| NCI-H460                          | 0.324        | 3.036               | 3.090 | 3.088                  | 0.507 | 0.108 | 0.094 | 102  | 102            | 7    | -67  | -71 | 1.76E-7 | 6.18E-7 | 2.96E-6   |  |
| NCI-H522                          | 0.930        | 2.333               | 2.233 | 2.272                  | 1.679 | 0.514 | 0.511 | 93   | 96             | 53   | -45  | -45 | 5.41E-7 | 1.75E-6 | > 5.00E-5 |  |
| <b>Colon Cancer</b>               |              |                     |       |                        |       |       |       |      |                |      |      |     |         |         |           |  |
| COLO 205                          | 0.345        | 1.441               | 1.446 | 1.443                  | 1.338 | 0.030 | 0.023 | 100  | 100            | 91   | -91  | -93 | 8.36E-7 | 1.57E-6 | 2.96E-6   |  |
| HCC-2998                          | 0.722        | 2.379               | 2.274 | 2.251                  | 2.045 | 0.226 | 0.150 | 94   | 92             | 80   | -69  | -79 | 7.94E-7 | 1.72E-6 | 3.74E-6   |  |
| HCT-116                           | 0.111        | 1.520               | 1.514 | 1.370                  | 0.862 | 0.061 | 0.012 | 100  | 89             | 53   | -45  | -90 | 5.40E-7 | 1.74E-6 | 6.46E-6   |  |
| HCT-15                            | 0.152        | 2.054               | 1.978 | 1.916                  | 0.633 | 0.068 | 0.069 | 96   | 93             | 25   | -55  | -55 | 2.15E-7 | 1.03E-6 | 4.30E-6   |  |
| HT29                              | 0.243        | 1.603               | 1.538 | 1.595                  | 1.343 | 0.162 | 0.130 | 95   | 99             | 81   | -33  | -47 | 9.31E-7 | 2.55E-6 | > 5.00E-5 |  |
| KM12                              | 0.557        | 2.932               | 2.845 | 2.836                  | 2.344 | 0.485 | 0.053 | 96   | 96             | 75   | -13  | -91 | 9.66E-7 | 3.56E-6 | 1.50E-5   |  |
| SW-620                            | 0.278        | 2.263               | 2.192 | 2.266                  | 1.094 | 0.079 | 0.054 | 96   | 100            | 41   | -72  | -81 | 3.53E-7 | 1.16E-6 | 3.21E-6   |  |
| <b>CNS Cancer</b>                 |              |                     |       |                        |       |       |       |      |                |      |      |     |         |         |           |  |
| SF-268                            | 0.730        | 2.208               | 2.142 | 2.085                  | 1.504 | 0.603 | 0.384 | 96   | 92             | 52   | -17  | -47 | 5.40E-7 | 2.81E-6 | > 5.00E-5 |  |
| SF-295                            | 1.109        | 2.216               | 2.073 | 2.051                  | 0.828 | 0.034 | 0.076 | 87   | 85             | -25  | -97  | -93 | 1.04E-7 | 2.95E-7 | 1.10E-6   |  |
| SF-539                            | 0.534        | 2.548               | 2.425 | 2.379                  | 0.806 | 0.023 | 0.037 | 94   | 92             | 13   | -96  | -93 | 1.70E-7 | 6.64E-7 | 1.91E-6   |  |
| SNB-19                            | 0.851        | 2.302               | 2.198 | 2.107                  | 1.095 | 0.133 | 0.025 | 93   | 87             | 17   | -84  | -97 | 1.67E-7 | 7.32E-7 | 2.28E-6   |  |
| SNB-75                            | 0.807        | 1.465               | 1.330 | 1.427                  | 0.692 | 0.030 | 0.016 | 79   | 94             | -14  | -96  | -98 | 1.28E-7 | 3.69E-7 | 1.36E-6   |  |
| U251                              | 0.360        | 1.980               | 2.002 | 2.133                  | 0.945 | 0.291 | 0.109 | 101  | 109            | 36   | -19  | -70 | 3.23E-7 | 2.25E-6 | 2.04E-5   |  |
| <b>Melanoma</b>                   |              |                     |       |                        |       |       |       |      |                |      |      |     |         |         |           |  |
| LOX IMVI                          | 0.395        | 2.343               | 2.222 | 2.062                  | 0.612 | 0.117 | 0.185 | 94   | 86             | 11   | -71  | -53 | 1.50E-7 | 6.85E-7 | 2.80E-6   |  |
| MALME-3M                          | 0.636        | 1.136               | 1.149 | 0.749                  | 0.180 | 0.025 | 0.073 | 103  | 23             | -72  | -96  | -89 | 2.27E-8 | 8.67E-8 | 2.94E-7   |  |
| M14                               | 0.438        | 1.778               | 1.862 | 1.582                  | 0.069 | 0.024 | 0.039 | 106  | 85             | -84  | -95  | -91 | 8.08E-8 | 1.59E-7 | 3.14E-7   |  |
| MDA-MB-435                        | 0.462        | 1.840               | 1.847 | 1.791                  | 0.057 | 0.039 | 0.069 | 100  | 96             | -88  | -92  | -85 | 8.94E-8 | 1.67E-7 | 3.12E-7   |  |
| SK-MEL-2                          | 1.158        | 2.455               | 2.470 | 2.449                  | 1.959 | 0.526 | 0.414 | 101  | 100            | 62   | -55  | -64 | 6.31E-7 | 1.70E-6 | 4.56E-6   |  |
| SK-MEL-28                         | 0.530        | 1.600               | 1.685 | 1.777                  | 0.605 | 0.197 | 0.025 | 108  | 117            | 7    | -63  | -95 | 2.03E-7 | 6.30E-7 | 3.27E-6   |  |
| SK-MEL-5                          | 0.564        | 2.858               | 2.762 | 2.670                  | 0.058 | 0.034 | 0.020 | 96   | 92             | -90  | -94  | -97 | 8.49E-8 | 1.60E-7 | 3.02E-7   |  |
| UACC-257                          | 0.755        | 1.683               | 1.673 | 1.686                  | 1.270 | 0.032 | 0.112 | 99   | 100            | 55   | -96  | -85 | 5.43E-7 | 1.16E-6 | 2.49E-6   |  |
| UACC-62                           | 0.927        | 3.011               | 3.024 | 2.997                  | 1.348 | 0.177 | 0.132 | 101  | 99             | 20   | -81  | -86 | 2.10E-7 | 7.92E-7 | 2.47E-6   |  |
| <b>Ovarian Cancer</b>             |              |                     |       |                        |       |       |       |      |                |      |      |     |         |         |           |  |
| IGROV1                            | 0.700        | 1.685               | 1.710 | 1.727                  | 1.550 | 0.415 | 0.185 | 102  | 104            | 86   | -41  | -74 | 9.65E-7 | 2.39E-6 | 9.54E-6   |  |
| OVCAR-3                           | 0.684        | 2.037               | 2.009 | 2.070                  | 0.536 | 0.310 | 0.039 | 98   | 102            | -22  | -55  | -94 | 1.32E-7 | 3.34E-7 | 3.61E-6   |  |
| OVCAR-4                           | 0.481        | 1.120               | 1.101 | 1.079                  | 0.971 | 0.488 | 0.106 | 97   | 94             | 77   | 1    | -78 | 1.13E-6 | 5.16E-6 | 2.21E-5   |  |
| OVCAR-5                           | 0.410        | 1.356               | 1.327 | 1.327                  | 1.384 | 0.035 | 0.041 | 97   | 97             | 103  | -91  | -90 | 9.36E-7 | 1.69E-6 | 3.06E-6   |  |
| OVCAR-8                           | 0.415        | 2.045               | 1.990 | 1.962                  | 1.347 | 0.394 | 0.018 | 97   | 95             | 57   | -5   | -96 | 6.51E-7 | 4.13E-6 | 1.56E-5   |  |
| SK-OV-3                           | 0.694        | 1.654               | 1.682 | 1.777                  | 1.630 | 0.679 | 0.134 | 103  | 113            | 98   | -2   | -81 | 1.50E-6 | 4.76E-6 | 2.03E-5   |  |
| <b>Renal Cancer</b>               |              |                     |       |                        |       |       |       |      |                |      |      |     |         |         |           |  |
| 786-0                             | 0.680        | 2.552               | 2.481 | 2.454                  | 2.385 | 0.470 | 0.143 | 96   | 95             | 91   | -31  | -79 | 1.09E-6 | 2.79E-6 | 1.25E-5   |  |
| A498                              | 1.422        | 2.354               | 2.315 | 2.266                  | 2.089 | 0.063 | 0.026 | 96   | 91             | 72   | -96  | -98 | 6.73E-7 | 1.34E-6 | 2.67E-6   |  |
| ACHN                              | 0.242        | 1.822               | 1.864 | 1.806                  | 1.287 | 0.318 | 0.030 | 103  | 99             | 66   | 5    | -88 | 9.16E-7 | 5.63E-6 | 1.95E-5   |  |
| CAKI-1                            | 0.449        | 1.535               | 1.510 | 1.585                  | 1.150 | 0.234 | 0.020 | 98   | 105            | 65   | -48  | -96 | 6.74E-7 | 1.88E-6 | 5.54E-6   |  |
| RXF 393                           | 0.783        | 1.216               | 1.173 | 1.139                  | 1.000 | 0.151 | 0.031 | 90   | 82             | 50   | -81  | -96 | 5.00E-7 | 1.21E-6 | 2.91E-6   |  |
| SN12C                             | 0.724        | 2.713               | 2.662 | 2.492                  | 1.194 | 0.061 | 0.072 | 97   | 89             | 24   | -92  | -90 | 1.97E-7 | 8.01E-7 | 2.18E-6   |  |
| TK-10                             | 0.721        | 1.542               | 1.492 | 1.585                  | 1.656 | 0.374 | 0.098 | 94   | 105            | 114  | -48  | -86 | 1.24E-6 | 2.52E-6 | 5.60E-6   |  |
| UO-31                             | 0.842        | 2.114               | 2.009 | 1.966                  | 1.540 | 0.161 | 0.025 | 92   | 88             | 55   | -81  | -97 | 5.43E-7 | 1.27E-6 | 2.96E-6   |  |
| <b>Prostate Cancer</b>            |              |                     |       |                        |       |       |       |      |                |      |      |     |         |         |           |  |
| PC-3                              | 0.431        | 1.236               | 1.219 | 1.188                  | 1.063 | 0.414 | 0.293 | 98   | 94             | 79   | -4   | -32 | 1.11E-6 | 4.48E-6 | > 5.00E-5 |  |
| DU-145                            | 0.327        | 1.611               | 1.614 | 1.454                  | 0.028 | 0.015 | 0.013 | 100  | 88             | -91  | -95  | -96 | 8.12E-8 | 1.54E-7 | 2.94E-7   |  |
| <b>Breast Cancer</b>              |              |                     |       |                        |       |       |       |      |                |      |      |     |         |         |           |  |
| MCF7                              | 0.625        | 2.807               | 2.695 | 2.736                  | 1.995 | 0.380 | 0.274 | 95   | 97             | 63   | -39  | -56 | 6.67E-7 | 2.06E-6 | 2.15E-5   |  |
| MDA-MB-231/ATCC                   | 0.670        | 1.512               | 1.488 | 1.341                  | 0.964 | 0.693 | 0.509 | 97   | 80             | 35   | 3    | -24 | 2.30E-7 | 6.29E-6 | > 5.00E-5 |  |
| HS 578T                           | 1.036        | 2.074               | 2.006 | 2.013                  | 1.060 | 0.777 | 0.886 | 93   | 94             | 2    | -25  | -15 | 1.51E-7 | 6.05E-7 | > 5.00E-5 |  |
| BT-549                            | 0.920        | 1.957               | 1.937 | 1.892                  | 0.961 | 0.019 | 0.069 | 98   | 94             | 4    | -98  | -93 | 1.53E-7 | 5.47E-7 | 1.69E-6   |  |
| T-47D                             | 0.709        | 1.739               | 1.698 | 1.728                  | 1.692 | 0.787 | 0.316 | 96   | 99             | 95   | 8    | -55 | 1.64E-6 | 6.59E-6 | 4.10E-5   |  |
| MDA-MB-468                        | 0.713        | 1.511               | 1.446 | 1.457                  | 1.432 | 0.446 | 0.114 | 92   | 93             | 90   | -37  | -84 | 1.03E-6 | 2.54E-6 | 9.30E-6   |  |

| National Cancer Institute Developmental Therapeutics Program |                        | NSC : D - 765862/1            |                       | Units :Molar |                        | SSPL :075T                 |  | EXP. ID :1208NS22 |  |
|--------------------------------------------------------------|------------------------|-------------------------------|-----------------------|--------------|------------------------|----------------------------|--|-------------------|--|
| Mean Graphs                                                  |                        | Report Date :January 23, 2014 |                       |              |                        | Test Date :August 06, 2012 |  |                   |  |
| Panel/Cell Line                                              | Log <sub>10</sub> G150 | G150                          | Log <sub>10</sub> TGI | TGI          | Log <sub>10</sub> LC50 | LC50                       |  |                   |  |
| Leukemia                                                     |                        |                               |                       |              |                        |                            |  |                   |  |
| CCRF-CEM                                                     | -6.00                  |                               | -5.33                 |              | >>> -4.30              |                            |  |                   |  |
| HL-60(TB)                                                    | -6.02                  |                               | -5.55                 |              | >>> -4.30              |                            |  |                   |  |
| K-562                                                        | -6.34                  |                               | -5.20                 |              | >>> -4.30              |                            |  |                   |  |
| MOLT-4                                                       | -5.88                  |                               | -5.30                 |              | >>> -4.30              |                            |  |                   |  |
| RPMI-8226                                                    | -6.20                  |                               | -5.68                 |              | >>> -4.30              |                            |  |                   |  |
| SR                                                           | -6.33                  |                               | -5.47                 |              | >>> -4.30              |                            |  |                   |  |
| Non-Small Cell Lung Cancer                                   |                        |                               |                       |              |                        |                            |  |                   |  |
| A549/ATCC                                                    | -6.69                  |                               | -6.08                 |              | >>> -5.18              |                            |  |                   |  |
| HOP-62                                                       | -6.76                  |                               | -6.18                 |              | >>> -5.64              |                            |  |                   |  |
| HOP-92                                                       | -5.79                  |                               | -5.38                 |              | >>> -4.74              |                            |  |                   |  |
| NCI-H226                                                     | -6.22                  |                               | -5.81                 |              | >>> -5.41              |                            |  |                   |  |
| NCI-H23                                                      | -6.80                  |                               | -6.05                 |              | >>> -4.30              |                            |  |                   |  |
| NCI-H322M                                                    | -6.98                  |                               | -6.59                 |              | >>> -6.09              |                            |  |                   |  |
| NCI-H460                                                     | -6.76                  |                               | -6.21                 |              | >>> -5.53              |                            |  |                   |  |
| NCI-H522                                                     | -6.27                  |                               | -5.76                 |              | >>> -4.30              |                            |  |                   |  |
| Colon Cancer                                                 |                        |                               |                       |              |                        |                            |  |                   |  |
| COLO 205                                                     | -6.08                  |                               | -5.80                 |              | >>> -5.53              |                            |  |                   |  |
| HCC-2998                                                     | -6.10                  |                               | -5.76                 |              | >>> -5.43              |                            |  |                   |  |
| HCT-116                                                      | -6.27                  |                               | -5.76                 |              | >>> -5.19              |                            |  |                   |  |
| HCT-15                                                       | -6.67                  |                               | -5.99                 |              | >>> -5.37              |                            |  |                   |  |
| HT29                                                         | -6.03                  |                               | -5.59                 |              | >>> -4.30              |                            |  |                   |  |
| KM12                                                         | -6.01                  |                               | -5.45                 |              | >>> -4.82              |                            |  |                   |  |
| SW-620                                                       | -6.45                  |                               | -5.94                 |              | >>> -5.49              |                            |  |                   |  |
| CNS Cancer                                                   |                        |                               |                       |              |                        |                            |  |                   |  |
| SF-268                                                       | -6.27                  |                               | -5.55                 |              | >>> -4.30              |                            |  |                   |  |
| SF-295                                                       | -6.98                  |                               | -6.53                 |              | >>> -5.96              |                            |  |                   |  |
| SF-539                                                       | -6.77                  |                               | -6.18                 |              | >>> -5.72              |                            |  |                   |  |
| SNB-19                                                       | -6.78                  |                               | -6.14                 |              | >>> -5.84              |                            |  |                   |  |
| SNB-75                                                       | -6.89                  |                               | -6.43                 |              | >>> -5.87              |                            |  |                   |  |
| U251                                                         | -6.49                  |                               | -5.65                 |              | >>> -4.69              |                            |  |                   |  |
| Melanoma                                                     |                        |                               |                       |              |                        |                            |  |                   |  |
| LOX IMVI                                                     | -6.82                  |                               | -6.16                 |              | >>> -5.55              |                            |  |                   |  |
| MALME-3M                                                     | -7.64                  |                               | -7.06                 |              | >>> -6.53              |                            |  |                   |  |
| M14                                                          | -7.09                  |                               | -6.80                 |              | >>> -6.50              |                            |  |                   |  |
| MDA-MB-435                                                   | -7.05                  |                               | -6.78                 |              | >>> -6.51              |                            |  |                   |  |
| SK-MEL-2                                                     | -6.20                  |                               | -5.77                 |              | >>> -5.34              |                            |  |                   |  |
| SK-MEL-28                                                    | -6.69                  |                               | -6.20                 |              | >>> -5.49              |                            |  |                   |  |
| SK-MEL-5                                                     | -7.07                  |                               | -6.80                 |              | >>> -6.52              |                            |  |                   |  |
| UACC-267                                                     | -6.26                  |                               | -5.93                 |              | >>> -5.60              |                            |  |                   |  |
| UACC-62                                                      | -6.68                  |                               | -6.10                 |              | >>> -5.81              |                            |  |                   |  |
| Ovarian Cancer                                               |                        |                               |                       |              |                        |                            |  |                   |  |
| IGROV1                                                       | -6.02                  |                               | -5.62                 |              | >>> -5.02              |                            |  |                   |  |
| OVCAR-3                                                      | -6.88                  |                               | -6.48                 |              | >>> -5.44              |                            |  |                   |  |
| OVCAR-4                                                      | -5.95                  |                               | -5.29                 |              | >>> -4.65              |                            |  |                   |  |
| OVCAR-5                                                      | -6.03                  |                               | -5.77                 |              | >>> -5.51              |                            |  |                   |  |
| OVCAR-8                                                      | -6.19                  |                               | -5.38                 |              | >>> -4.81              |                            |  |                   |  |
| SK-OV-3                                                      | -5.82                  |                               | -5.32                 |              | >>> -4.69              |                            |  |                   |  |
| Renal Cancer                                                 |                        |                               |                       |              |                        |                            |  |                   |  |
| 786-0                                                        | -5.96                  |                               | -5.55                 |              | >>> -4.90              |                            |  |                   |  |
| A498                                                         | -6.17                  |                               | -5.87                 |              | >>> -5.57              |                            |  |                   |  |
| ACHN                                                         | -6.04                  |                               | -5.25                 |              | >>> -4.71              |                            |  |                   |  |
| CAKI-1                                                       | -6.17                  |                               | -5.73                 |              | >>> -5.26              |                            |  |                   |  |
| RXF 393                                                      | -6.30                  |                               | -5.92                 |              | >>> -5.54              |                            |  |                   |  |
| SN12C                                                        | -6.71                  |                               | -6.10                 |              | >>> -5.66              |                            |  |                   |  |
| TK-10                                                        | -5.91                  |                               | -5.60                 |              | >>> -5.25              |                            |  |                   |  |
| UO-31                                                        | -6.27                  |                               | -5.90                 |              | >>> -5.53              |                            |  |                   |  |
| Prostate Cancer                                              |                        |                               |                       |              |                        |                            |  |                   |  |
| PC-3                                                         | -5.96                  |                               | -5.35                 |              | >>> -4.30              |                            |  |                   |  |
| DU-145                                                       | -7.09                  |                               | -6.81                 |              | >>> -6.53              |                            |  |                   |  |
| Breast Cancer                                                |                        |                               |                       |              |                        |                            |  |                   |  |
| MCF7                                                         | -6.18                  |                               | -5.69                 |              | >>> -4.67              |                            |  |                   |  |
| MDA-MB-231/ATCC                                              | -6.64                  |                               | -5.20                 |              | >>> -4.30              |                            |  |                   |  |
| HS 578T                                                      | -6.82                  |                               | -6.22                 |              | >>> -4.30              |                            |  |                   |  |
| BT-549                                                       | -6.81                  |                               | -6.26                 |              | >>> -5.77              |                            |  |                   |  |
| T-47D                                                        | -5.78                  |                               | -5.18                 |              | >>> -4.39              |                            |  |                   |  |
| MDA-MB-468                                                   | -5.99                  |                               | -5.59                 |              | >>> -5.03              |                            |  |                   |  |
| MID Delta Range                                              |                        |                               |                       |              |                        |                            |  |                   |  |
| MID                                                          | -6.41                  |                               | -5.88                 |              | -5.19                  |                            |  |                   |  |
| Delta                                                        | 1.23                   |                               | 1.18                  |              | 1.34                   |                            |  |                   |  |
| Range                                                        | 1.86                   |                               | 1.88                  |              | 2.23                   |                            |  |                   |  |

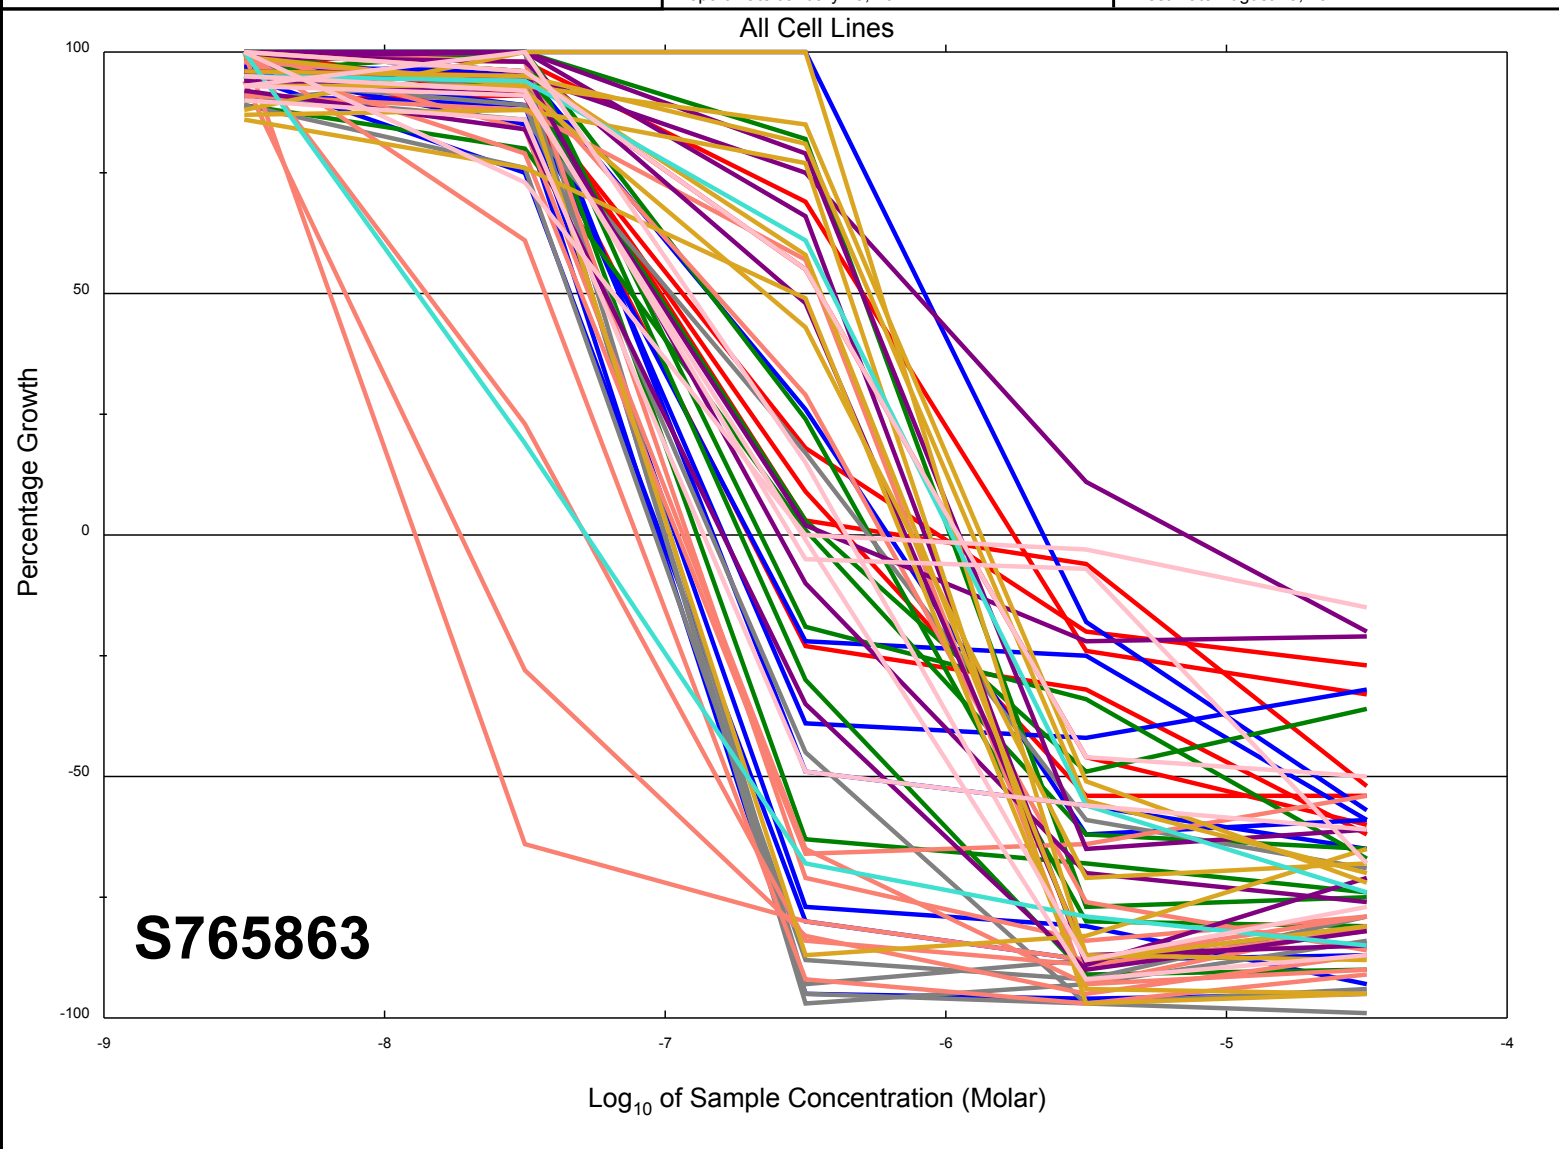

National Cancer Institute Developmental Therapeutics Program  
Dose Response Curves

NSC: D - 765863 / 1  
Report Date: January 23, 2014

SSPL: 075T  
Test Date: August 13, 2012

EXP. ID: 1208NS28

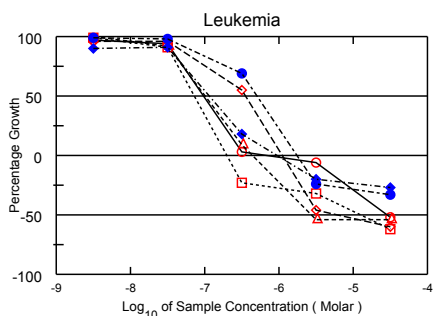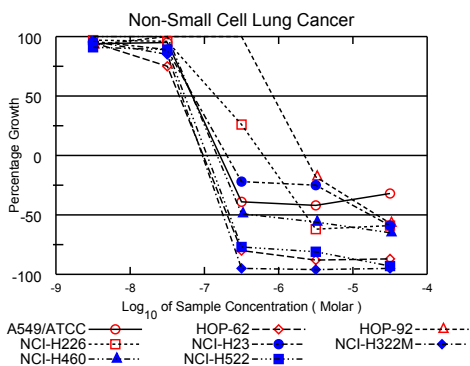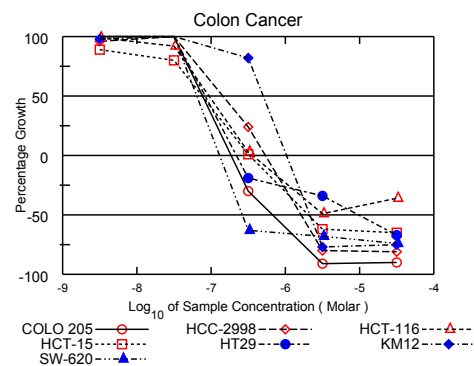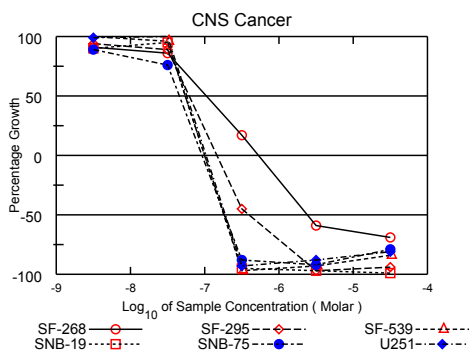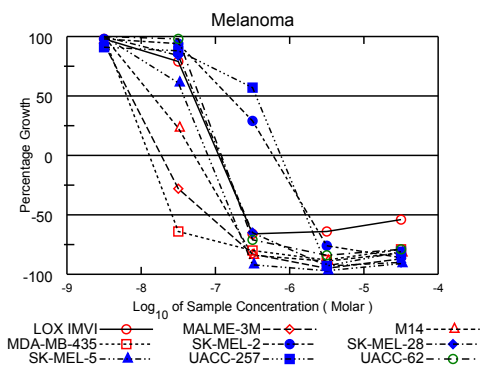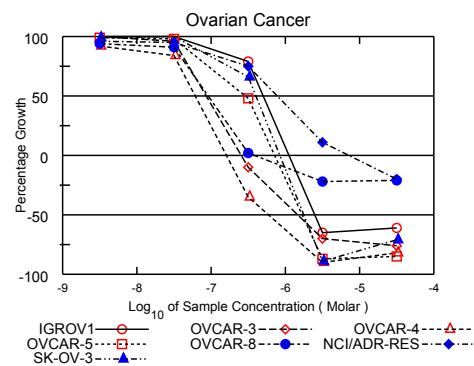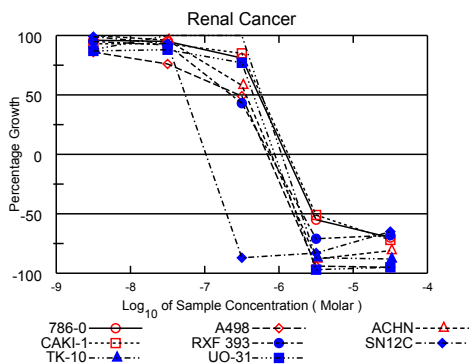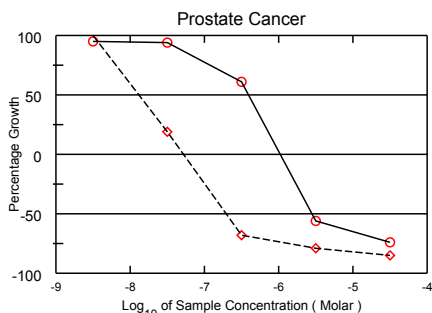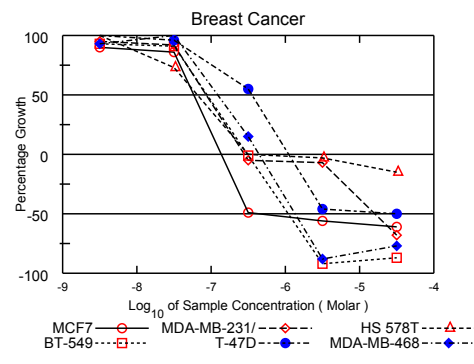

## National Cancer Institute Developmental Therapeutics Program In-Vitro Testing Results

|                                |                                       |                |               |
|--------------------------------|---------------------------------------|----------------|---------------|
| NSC : D - 765863 / 1           | Experiment ID : 1208NS28              | Test Type : 08 | Units : Molar |
| Report Date : January 23, 2014 | Test Date : August 13, 2012           | QNS :          | MC :          |
| COMI : LT417 (119559)          | Stain Reagent : SRB Dual-Pass Related | SSPL : 075T    |               |

| Panel/Cell Line                   | Time  | Log10 Concentration |       |                        |       |       |       |      |      |                |      |      | GI50    | TGI     | LC50      |  |  |
|-----------------------------------|-------|---------------------|-------|------------------------|-------|-------|-------|------|------|----------------|------|------|---------|---------|-----------|--|--|
|                                   |       | Zero                |       | Mean Optical Densities |       |       |       |      |      | Percent Growth |      |      |         |         |           |  |  |
|                                   |       | Ctrl                | -8.5  | -7.5                   | -6.5  | -5.5  | -4.5  | -8.5 | -7.5 | -6.5           | -5.5 | -4.5 |         |         |           |  |  |
| <b>Leukemia</b>                   |       |                     |       |                        |       |       |       |      |      |                |      |      |         |         |           |  |  |
| CCRF-CEM                          | 0.332 | 2.015               | 1.963 | 1.920                  | 0.389 | 0.313 | 0.158 | 97   | 94   | 3              | -6   | -52  | 9.98E-8 | 7.51E-7 | 2.88E-5   |  |  |
| HL-60(TB)                         | 0.659 | 2.606               | 2.527 | 2.533                  | 1.730 | 0.358 | 0.266 | 96   | 96   | 55             | -46  | -60  | 3.64E-7 | 1.14E-6 | 6.55E-6   |  |  |
| K-562                             | 0.247 | 2.089               | 2.103 | 1.941                  | 0.413 | 0.115 | 0.113 | 101  | 92   | 9              | -54  | -54  | 1.04E-7 | 4.53E-7 | 2.84E-6   |  |  |
| MOLT-4                            | 0.544 | 2.308               | 2.283 | 2.151                  | 0.417 | 0.369 | 0.209 | 99   | 91   | -23            | -32  | -62  | 7.42E-8 | 2.03E-7 | 1.31E-5   |  |  |
| RPMI-8226                         | 0.901 | 2.755               | 2.745 | 2.724                  | 2.178 | 0.681 | 0.604 | 99   | 98   | 69             | -24  | -33  | 5.18E-7 | 1.78E-6 | > 3.25E-5 |  |  |
| SR                                | 0.440 | 2.175               | 2.006 | 2.026                  | 0.751 | 0.352 | 0.320 | 90   | 91   | 18             | -20  | -27  | 1.19E-7 | 9.65E-7 | > 3.25E-5 |  |  |
| <b>Non-Small Cell Lung Cancer</b> |       |                     |       |                        |       |       |       |      |      |                |      |      |         |         |           |  |  |
| A549/ATCC                         | 0.365 | 2.023               | 1.923 | 1.942                  | 0.224 | 0.213 | 0.248 | 94   | 95   | -39            | -42  | -32  | 7.06E-8 | 1.67E-7 | > 3.25E-5 |  |  |
| HOP-62                            | 0.342 | 1.059               | 1.022 | 0.878                  | 0.070 | 0.042 | 0.045 | 95   | 75   | -80            | -88  | -87  | 4.70E-8 | 9.92E-8 | 2.09E-7   |  |  |
| HOP-92                            | 1.641 | 2.073               | 2.041 | 2.139                  | 2.210 | 1.343 | 0.708 | 93   | 115  | 132            | -18  | -57  | 1.14E-6 | 2.46E-6 | 2.16E-5   |  |  |
| NCI-H226                          | 0.670 | 1.227               | 1.209 | 1.202                  | 0.813 | 0.254 | 0.277 | 97   | 96   | 26             | -62  | -59  | 1.46E-7 | 6.36E-7 | 2.36E-6   |  |  |
| NCI-H23                           | 1.152 | 3.173               | 3.084 | 2.943                  | 0.898 | 0.863 | 0.469 | 96   | 89   | -22            | -25  | -59  | 7.26E-8 | 2.05E-7 | 1.74E-5   |  |  |
| NCI-H322M                         | 0.838 | 2.028               | 1.976 | 1.854                  | 0.046 | 0.035 | 0.046 | 96   | 85   | -95            | -96  | -95  | 5.11E-8 | 9.69E-8 | 1.84E-7   |  |  |
| NCI-H460                          | 0.375 | 3.146               | 3.213 | 3.232                  | 0.192 | 0.165 | 0.131 | 102  | 103  | -49            | -56  | -65  | 7.26E-8 | 1.55E-7 | 4.57E-7   |  |  |
| NCI-H522                          | 0.936 | 2.277               | 2.153 | 2.127                  | 0.220 | 0.178 | 0.061 | 91   | 89   | -77            | -81  | -93  | 5.58E-8 | 1.12E-7 | 2.25E-7   |  |  |
| <b>Colon Cancer</b>               |       |                     |       |                        |       |       |       |      |      |                |      |      |         |         |           |  |  |
| COLO 205                          | 0.473 | 1.918               | 1.967 | 1.995                  | 0.329 | 0.041 | 0.048 | 103  | 105  | -30            | -91  | -90  | 8.30E-8 | 1.94E-7 | 6.81E-7   |  |  |
| HCC-2998                          | 0.929 | 2.718               | 2.639 | 2.832                  | 1.366 | 0.184 | 0.178 | 96   | 106  | 24             | -80  | -81  | 1.58E-7 | 5.56E-7 | 1.67E-6   |  |  |
| HCT-116                           | 0.193 | 2.068               | 2.054 | 1.926                  | 0.255 | 0.099 | 0.123 | 99   | 92   | 3              | -49  | -36  | 9.73E-8 | 3.76E-7 | > 3.25E-5 |  |  |
| HCT-15                            | 0.173 | 1.547               | 1.391 | 1.274                  | 0.181 | 0.065 | 0.061 | 89   | 80   | 1              | -62  | -65  | 7.77E-8 | 3.32E-7 | 2.06E-6   |  |  |
| HT29                              | 0.237 | 1.492               | 1.530 | 1.579                  | 0.192 | 0.157 | 0.079 | 103  | 107  | -19            | -34  | -67  | 9.20E-8 | 2.30E-7 | 9.98E-6   |  |  |
| KM12                              | 0.462 | 2.321               | 2.275 | 2.349                  | 1.987 | 0.104 | 0.114 | 98   | 101  | 82             | -77  | -75  | 5.16E-7 | 1.06E-6 | 2.19E-6   |  |  |
| SW-620                            | 0.281 | 2.316               | 2.365 | 2.387                  | 0.105 | 0.090 | 0.074 | 102  | 103  | -63            | -68  | -74  | 6.82E-8 | 1.36E-7 | 2.73E-7   |  |  |
| <b>CNS Cancer</b>                 |       |                     |       |                        |       |       |       |      |      |                |      |      |         |         |           |  |  |
| SF-268                            | 0.667 | 2.312               | 2.171 | 2.085                  | 0.954 | 0.277 | 0.206 | 91   | 86   | 17             | -59  | -69  | 1.09E-7 | 5.51E-7 | 2.51E-6   |  |  |
| SF-295                            | 0.988 | 3.074               | 2.944 | 2.853                  | 0.540 | 0.032 | 0.057 | 94   | 89   | -45            | -97  | -94  | 6.37E-8 | 1.50E-7 | 4.00E-7   |  |  |
| SF-539                            | 0.547 | 1.907               | 1.939 | 1.851                  | 0.019 | 0.040 | 0.085 | 102  | 96   | -97            | -93  | -84  | 5.63E-8 | 1.02E-7 | 1.86E-7   |  |  |
| SNB-19                            | 0.894 | 2.421               | 2.276 | 2.350                  | 0.049 | 0.025 | 0.005 | 90   | 95   | -95            | -97  | -99  | 5.63E-8 | 1.03E-7 | 1.89E-7   |  |  |
| SNB-75                            | 0.738 | 1.574               | 1.486 | 1.377                  | 0.087 | 0.062 | 0.157 | 89   | 76   | -88            | -92  | -79  | 4.71E-8 | 9.46E-8 | 1.90E-7   |  |  |
| U251                              | 0.530 | 2.399               | 2.386 | 2.463                  | 0.037 | 0.063 | 0.101 | 99   | 103  | -93            | -88  | -81  | 6.08E-8 | 1.09E-7 | 1.96E-7   |  |  |
| <b>Melanoma</b>                   |       |                     |       |                        |       |       |       |      |      |                |      |      |         |         |           |  |  |
| LOX IMVI                          | 0.629 | 3.078               | 3.017 | 2.558                  | 0.212 | 0.226 | 0.288 | 98   | 79   | -66            | -64  | -54  | 5.13E-8 | 1.13E-7 | 2.51E-7   |  |  |
| MALME-3M                          | 0.684 | 1.567               | 1.513 | 0.493                  | 0.117 | 0.032 | 0.092 | 94   | -28  | -83            | -95  | -87  | 7.45E-9 | 1.92E-8 | 8.18E-8   |  |  |
| M14                               | 0.534 | 2.124               | 2.152 | 0.893                  | 0.084 | 0.057 | 0.094 | 102  | 23   | -84            | -89  | -82  | 1.46E-8 | 5.28E-8 | 1.55E-7   |  |  |
| MDA-MB-435                        | 0.421 | 2.002               | 2.048 | 0.150                  | 0.086 | 0.050 | 0.088 | 103  | -64  | -80            | -88  | -79  | 6.73E-9 | 1.34E-8 | 2.66E-8   |  |  |
| SK-MEL-2                          | 1.186 | 2.307               | 2.289 | 2.245                  | 1.513 | 0.279 | 0.169 | 98   | 94   | 29             | -76  | -86  | 1.56E-7 | 6.13E-7 | 1.82E-6   |  |  |
| SK-MEL-28                         | 0.443 | 1.282               | 1.345 | 1.148                  | 0.156 | 0.029 | 0.045 | 107  | 84   | -65            | -93  | -90  | 5.50E-8 | 1.19E-7 | 2.58E-7   |  |  |
| SK-MEL-5                          | 0.574 | 2.612               | 2.634 | 1.819                  | 0.044 | 0.019 | 0.051 | 101  | 61   | -92            | -97  | -91  | 3.84E-8 | 8.13E-8 | 1.72E-7   |  |  |
| UACC-257                          | 0.809 | 1.852               | 1.760 | 1.726                  | 1.399 | 0.058 | 0.157 | 91   | 88   | 57             | -93  | -81  | 3.59E-7 | 7.77E-7 | 1.68E-6   |  |  |
| UACC-62                           | 0.678 | 2.653               | 2.655 | 2.607                  | 0.198 | 0.109 | 0.141 | 100  | 98   | -71            | -84  | -79  | 6.24E-8 | 1.24E-7 | 2.45E-7   |  |  |
| <b>Ovarian Cancer</b>             |       |                     |       |                        |       |       |       |      |      |                |      |      |         |         |           |  |  |
| IGROV1                            | 0.570 | 1.943               | 1.951 | 1.937                  | 1.656 | 0.198 | 0.225 | 101  | 100  | 79             | -65  | -61  | 5.17E-7 | 1.15E-6 | 2.54E-6   |  |  |
| OVCAR-3                           | 0.593 | 1.842               | 1.883 | 1.795                  | 0.535 | 0.176 | 0.141 | 103  | 96   | -10            | -70  | -76  | 8.86E-8 | 2.62E-7 | 1.50E-6   |  |  |
| OVCAR-4                           | 0.822 | 1.698               | 1.632 | 1.562                  | 0.531 | 0.085 | 0.149 | 92   | 84   | -35            | -90  | -82  | 6.30E-8 | 1.65E-7 | 6.04E-7   |  |  |
| OVCAR-5                           | 0.545 | 1.562               | 1.552 | 1.538                  | 1.037 | 0.073 | 0.083 | 99   | 98   | 48             | -87  | -85  | 3.01E-7 | 7.42E-7 | 1.74E-6   |  |  |
| OVCAR-8                           | 0.467 | 2.146               | 2.046 | 1.988                  | 0.501 | 0.366 | 0.368 | 94   | 91   | 2              | -22  | -21  | 9.33E-8 | 3.94E-7 | > 3.25E-5 |  |  |
| NCI/ADR-RES                       | 0.625 | 2.313               | 2.252 | 2.236                  | 1.893 | 0.816 | 0.502 | 96   | 95   | 75             | 11   | -20  | 8.04E-7 | 7.52E-6 | > 3.25E-5 |  |  |
| SK-OV-3                           | 0.407 | 1.056               | 1.048 | 1.096                  | 0.836 | 0.044 | 0.118 | 99   | 106  | 66             | -89  | -71  | 4.13E-7 | 8.66E-7 | 1.82E-6   |  |  |
| <b>Renal Cancer</b>               |       |                     |       |                        |       |       |       |      |      |                |      |      |         |         |           |  |  |
| 786-0                             | 0.678 | 2.481               | 2.401 | 2.400                  | 2.147 | 0.305 | 0.202 | 96   | 95   | 81             | -55  | -70  | 5.53E-7 | 1.28E-6 | 2.99E-6   |  |  |
| A498                              | 1.458 | 2.326               | 2.205 | 2.114                  | 1.888 | 0.093 | 0.077 | 86   | 76   | 49             | -94  | -95  | 3.10E-7 | 7.21E-7 | 1.61E-6   |  |  |
| ACHN                              | 0.290 | 1.528               | 1.540 | 1.484                  | 1.012 | 0.035 | 0.055 | 101  | 96   | 58             | -88  | -81  | 3.71E-7 | 8.13E-7 | 1.79E-6   |  |  |
| CAKI-1                            | 0.912 | 3.064               | 2.922 | 2.912                  | 2.736 | 0.449 | 0.255 | 93   | 93   | 85             | -51  | -72  | 5.87E-7 | 1.37E-6 | 3.21E-6   |  |  |
| RXF 393                           | 0.614 | 1.130               | 1.104 | 1.087                  | 0.838 | 0.181 | 0.197 | 95   | 92   | 43             | -71  | -68  | 2.38E-7 | 7.81E-7 | 2.14E-6   |  |  |
| SN12C                             | 0.908 | 3.035               | 3.022 | 2.884                  | 0.120 | 0.158 | 0.315 | 99   | 93   | -87            | -83  | -65  | 5.63E-8 | 1.07E-7 | 2.03E-7   |  |  |
| TK-10                             | 0.831 | 1.691               | 1.586 | 1.688                  | 1.751 | 0.106 | 0.099 | 88   | 100  | 107            | -87  | -88  | 6.39E-7 | 1.15E-6 | 2.09E-6   |  |  |
| UO-31                             | 0.820 | 2.396               | 2.189 | 2.212                  | 2.032 | 0.025 | 0.040 | 87   | 88   | 77             | -97  | -95  | 4.64E-7 | 9.00E-7 | 1.74E-6   |  |  |
| <b>Prostate Cancer</b>            |       |                     |       |                        |       |       |       |      |      |                |      |      |         |         |           |  |  |
| PC-3                              | 0.582 | 1.840               | 1.774 | 1.768                  | 1.347 | 0.255 | 0.151 | 95   | 94   | 61             | -56  | -74  | 4.02E-7 | 1.08E-6 | 2.88E-6   |  |  |
| DU-145                            | 0.350 | 1.620               | 1.673 | 0.591                  | 0.114 | 0.074 | 0.054 | 104  | 19   | -68            | -79  | -85  | 1.40E-8 | 5.38E-8 | 2.04E-7   |  |  |
| <b>Breast Cancer</b>              |       |                     |       |                        |       |       |       |      |      |                |      |      |         |         |           |  |  |
| MCF7                              | 0.395 | 2.250               | 2.065 | 1.984                  | 0.200 | 0.173 | 0.154 | 90   | 86   | -49            | -56  | -61  | 5.97E-8 | 1.40E-7 | 4.01E-7   |  |  |
| MDA-MB-231/ATCC                   | 0.595 | 1.470               | 1.430 | 1.399                  | 0.564 | 0.554 | 0.190 | 95   | 92   | -5             | -7   | -68  | 8.77E-8 | 2.87E-7 | 1.64E-5   |  |  |
| HS 578T                           | 1.007 | 2.087               | 2.114 | 1.799                  | 1.004 | 0.975 | 0.854 | 103  | 73   | .              | -3   | -15  | 6.74E-8 | 3.21E-7 | > 3.25E-5 |  |  |
| BT-549                            | 0.935 | 1.859               | 1.793 | 1.777                  | 0.927 | 0.074 | 0.119 | 93   | 91   | -1             | -92  | -87  | 9.09E-8 | 3.18E-7 | 1.12E-6   |  |  |
| T-47D                             | 0.592 | 1.360               | 1.385 | 1.331                  | 1.015 | 0.319 | 0.297 | 103  | 96   | 55             | -46  | -50  | 3.65E-7 | 1.14E-6 | > 3.25E-5 |  |  |
| MDA-MB-468                        | 0.637 | 1.406               | 1.351 | 1.486                  | 0.752 | 0.076 | 0.149 | 93   | 110  | 15             | -88  | -77  | 1.39E-7 | 4.54E-7 | 1.39E-6   |  |  |

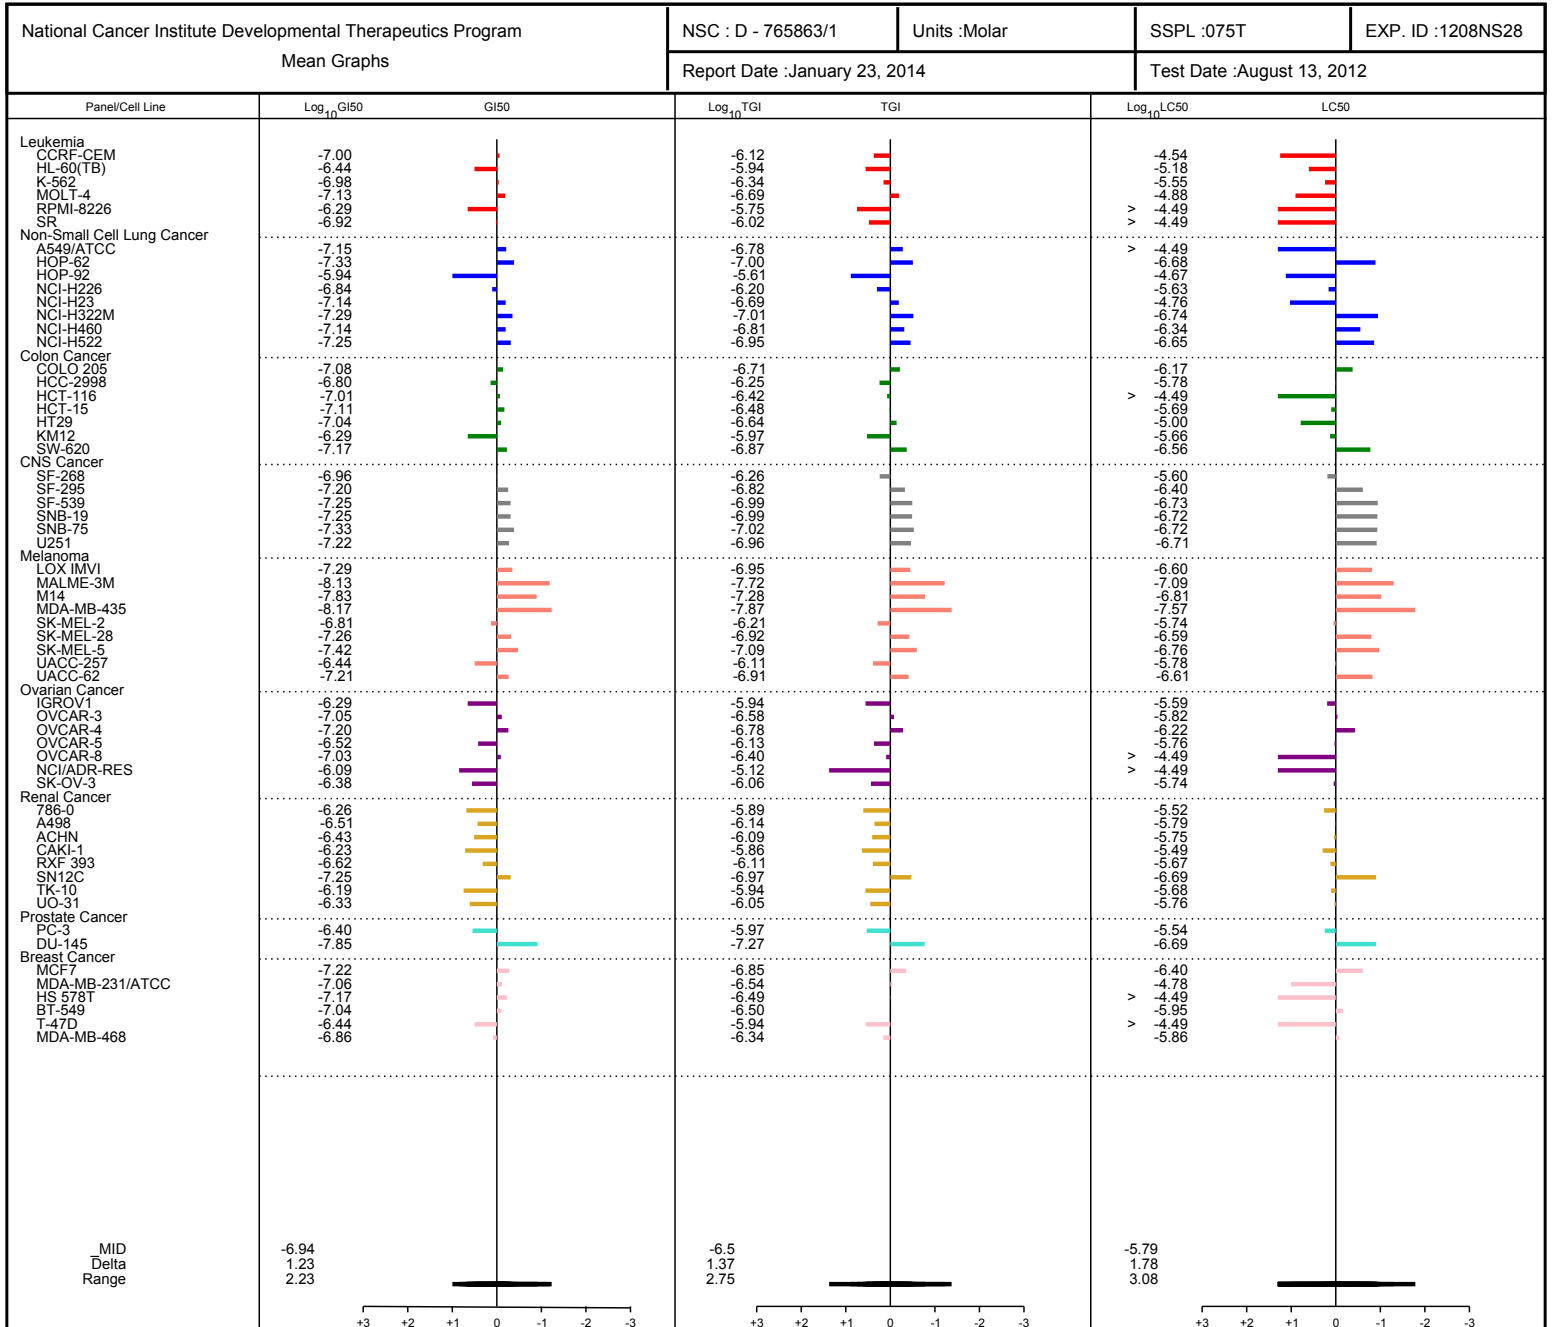



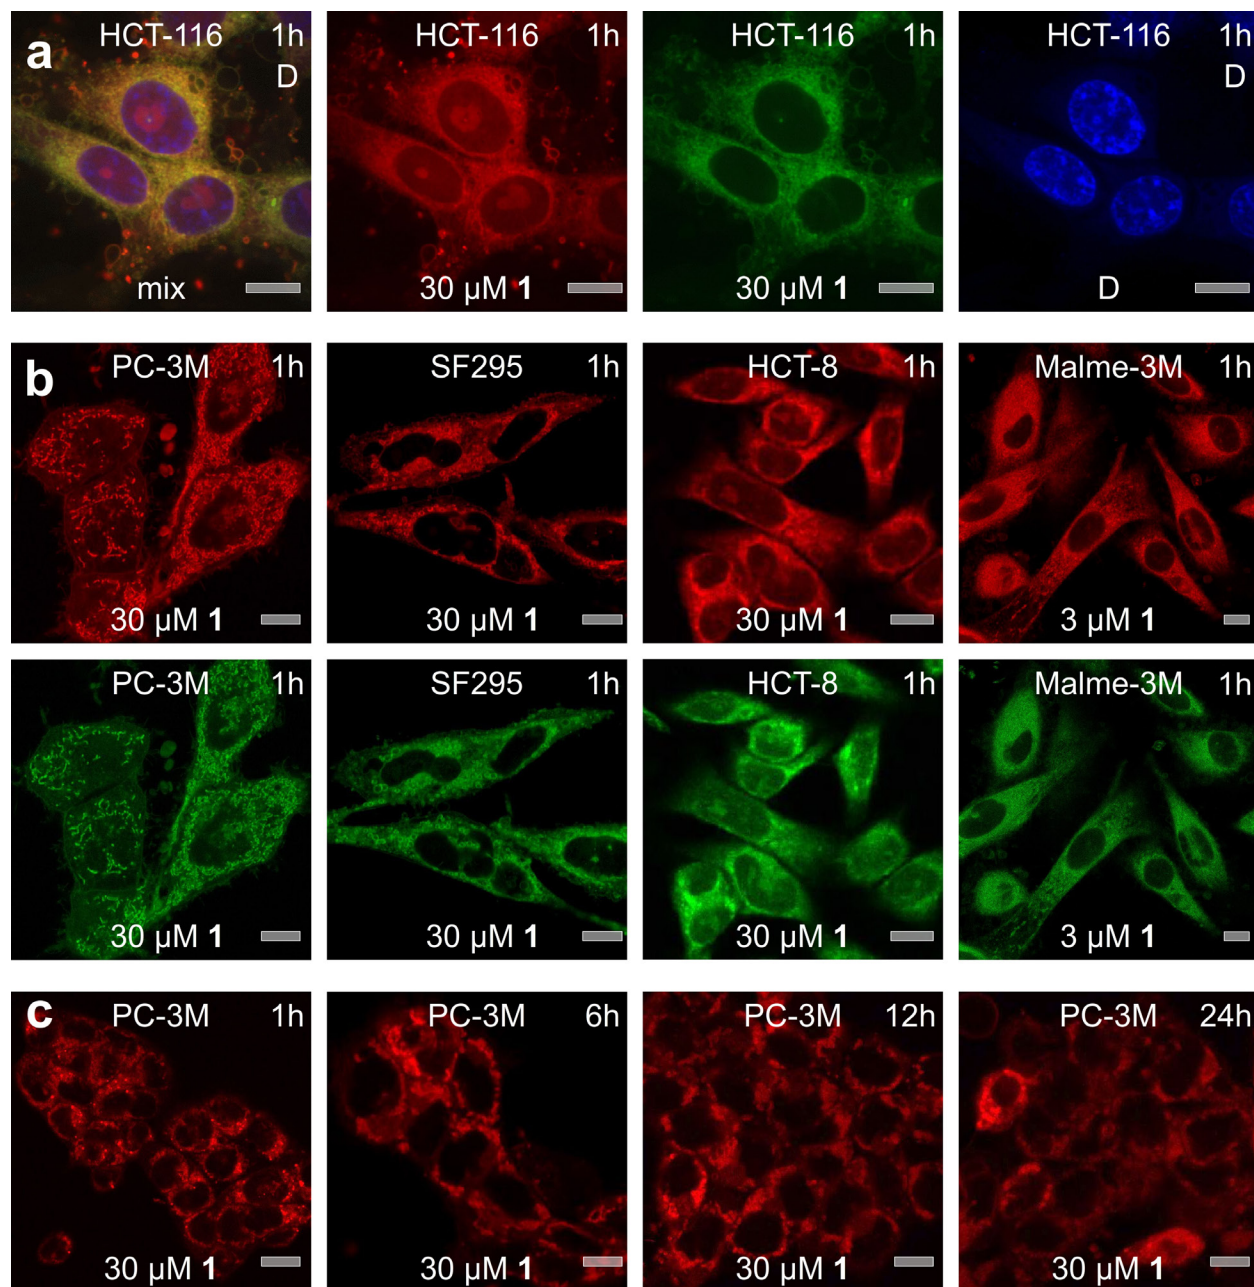

An expansion of panels a-c from Figure 2



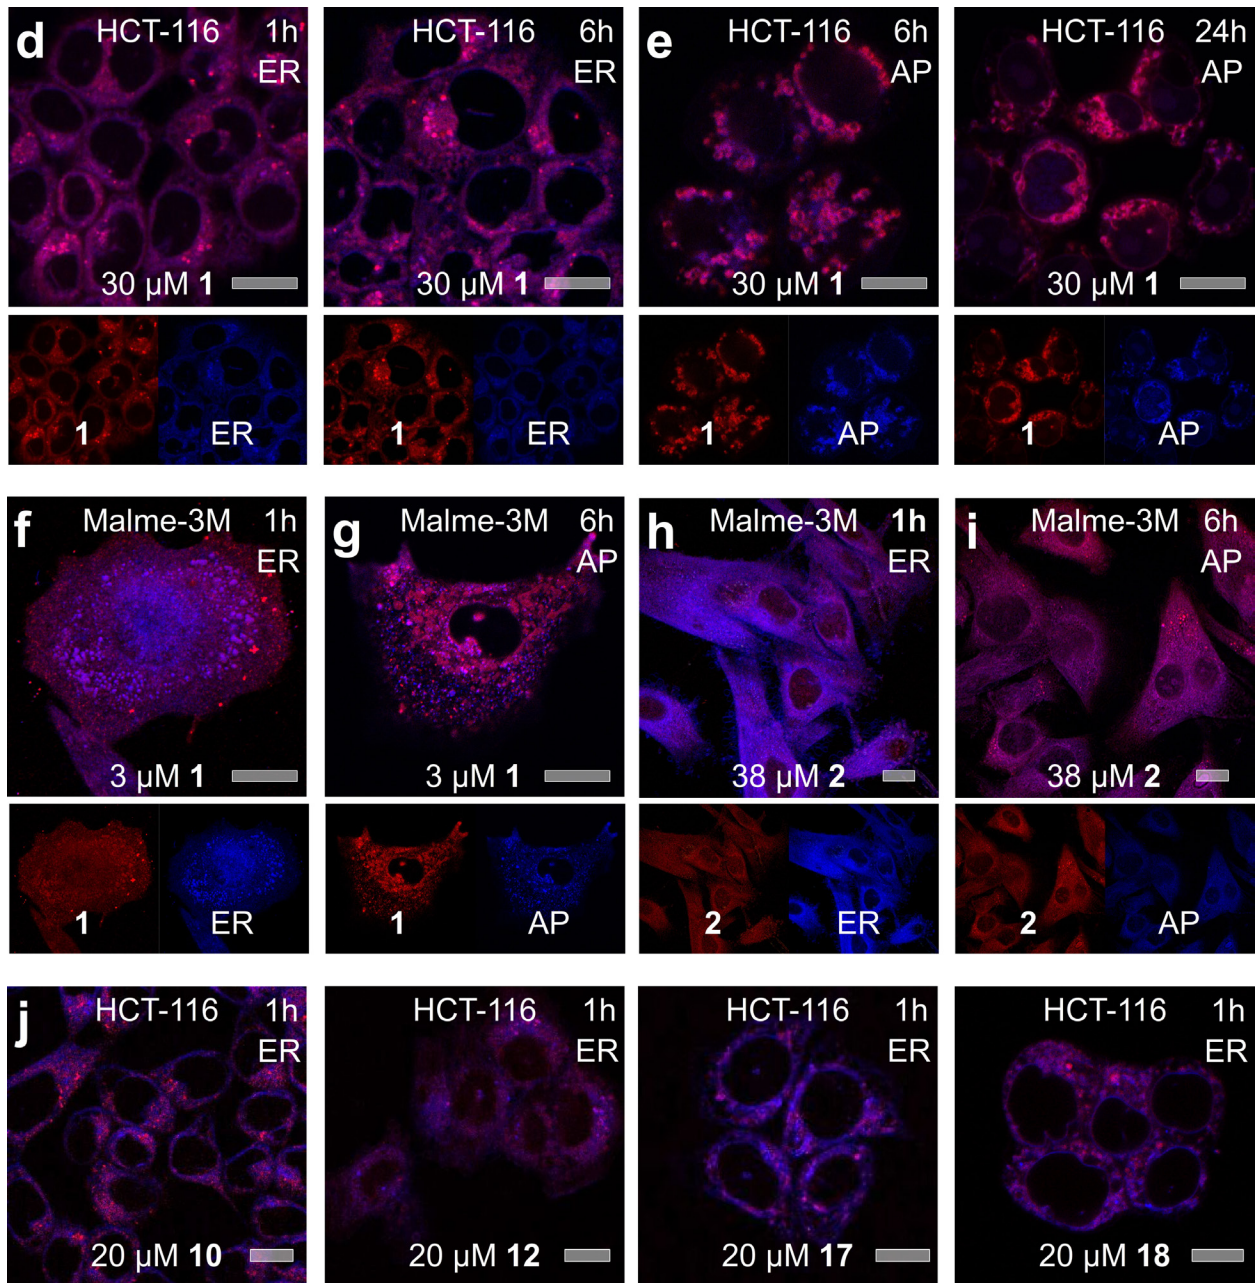

An expansion of the panel d-j from Figure 2
